# Supplementary material for: Copper-catalyzed cross-coupling and sequential allene-mediated cyclization for the synthesis of 1,2,3-triazolo[1,5-a]quinolines
Source: Royal Society of Chemistry journal article supplement (doi:10.1039/d0ob00435a), 2020-01-01

## Supplementary Information

### Copper-Catalyzed Cross-Coupling and Sequential Allene-Mediated Cyclization For 1,2,3-Triazolo[1,5-*a*]quinolines

*Jianhua Yang, Shaoqi Xiong, Yongsheng Ren, Tiebo Xiao, \* Yubo Jiang\**

*Faculty of Science, Kunming University of Science and Technology, Kunming, 650500,  
China.*

#### Table of Contents

|                                                                                                                   |     |
|-------------------------------------------------------------------------------------------------------------------|-----|
| 1. General Information.....                                                                                       | S2  |
| 2. General Procedure for the synthesis of 1-(2-ethynylaryl)-1,4-<br>Disubstituted-1,2,3-triazoles <b>1</b> .....  | S2  |
| 3. General Procedure for the synthesis of <i>N</i> -tosylhydrazones <b>2</b> .....                                | S2  |
| 4. General Procedure for the synthesis of 1,2,3-Triazolo[1,5- <i>a</i> ]quinolines<br><b>3</b> and <b>4</b> ..... | S3  |
| 5. Spectral Data of the Compounds .....                                                                           | S4  |
| 6. X-ray Data of <b>3a</b> .....                                                                                  | S16 |
| 7. <sup>1</sup> H and <sup>13</sup> C NMR Spectra of the Compounds.....                                           | S17 |

## 1. General Information

$^1\text{H}$  and  $^{13}\text{C}$  NMR spectra were recorded with a Bruker ACF600 spectrometer (600 MHz) in  $\text{CDCl}_3$  with TMS as an internal standard. All reactions were monitored by TLC with Huanghai GF 254 silica gel coated plates. Column chromatography was carried out using 200–300 mesh silica gel at medium pressure. Infrared spectra were taken on a Bruker Vertex Series FTIR (KBr) and are reported in reciprocal centimeters ( $\text{cm}^{-1}$ ). Melting points were obtained using a Büchi melting point apparatus and are uncorrected. HRMS spectra were recorded on Waters Micromass Premier Q-TOF spectrometer.

## 2. General Procedure for the synthesis of 1-(2-ethynylaryl)-1,4-disubstituted-1,2,3-triazoles **1**

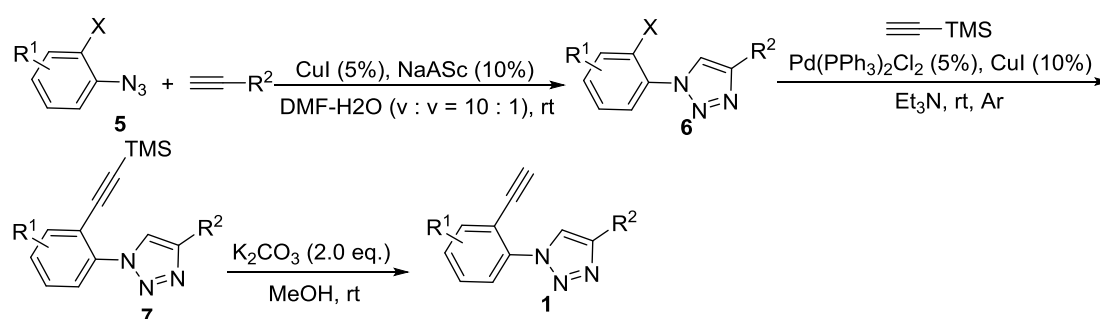

To a 100 mL round-bottomed flask was added aryl azide **5** (5.0 mmol), alkyne,  $\text{CuI}$  (0.25 mmol),  $\text{NaASc}$  (0.5) and  $\text{DMF-H}_2\text{O}$  ( $v:v = 10:1$ ) (40 mL). The system was then stirred at room temperature for overnight. After consumption of the aryl azide and alkyne monitored by TLC analysis, the mixture was added with  $\text{H}_2\text{O}$  (40 mL) and extracted with  $\text{EtOAc}$  ( $3 \times 20$  mL), and the combined organic layer was washed with brine ( $3 \times 10$  mL), dried over  $\text{Na}_2\text{SO}_4$  and concentrated under reduced pressure to afford a crude product. Purification by column chromatography on silica gel afforded the desired substrates **6**. Next, to a 100 mL round-bottomed flask was **6**, trimethylsilylacetylene (1.5 eq.),  $\text{Pd}(\text{PPh}_3)_2\text{Cl}_2$  (5%),  $\text{CuI}$  (10%),  $\text{Et}_3\text{N}$  (15 mL). The system was then stirred at room temperature for overnight in an argon atmosphere. Intermediate **7** was obtained with the same post-treatment steps. Finally, To a 100 mL round-bottomed flask was added **7**,  $\text{K}_2\text{CO}_3$  (2.0 eq.),  $\text{MeOH}$  (15 mL). The system was then stirred at room temperature for overnight. Desired product **1** was obtained with the same post-treatment steps.

## 3. General Procedure for the synthesis of *N*-tosylhydrazones **2**

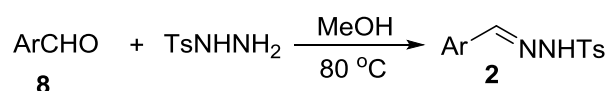

To a 50 mL pressure tube was added aromatic **8** (5.0 mmol), and  $\text{TsNHNH}_2$  (5.5 mmol),  $\text{MeOH}$  (15 mL). The system was then stirred at  $80^\circ\text{C}$  for overnight. The

mixture was concentrated under reduced pressure to precipitate crystals, filtered and washed with a small amount of MeOH (2-3 mL) to obtain compound **2**.

#### 4. General Procedure for the synthesis of 1,2,3-Triazolo[1,5-*a*]quinolines **3** and **4**

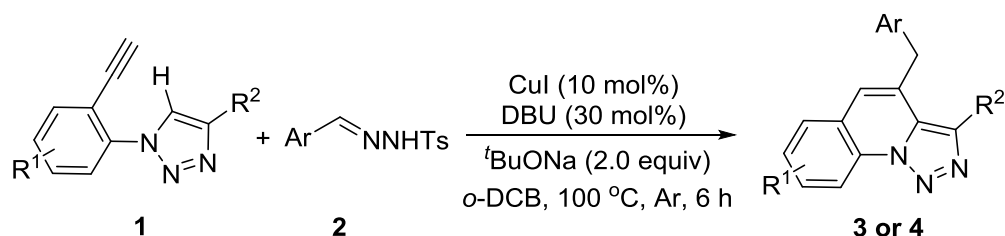

To a 50 mL pressure tube was added 1,4-disubstitued 1,2,3-triazoles **1** (0.3 mmol), CuI (5.3 mg, 0.03 mmol, 10%), 1,8-diazabicyclo[5.4.0]undec-7-ene (DBU) (13.7 mg, 0.09 mmol, 30%), <sup>t</sup>BuONa (57.6 mg, 0.60 mmol, 2.0 equiv), and 1,2-dichlorobenzene (*o*-DCB) (3.0 mL) under Ar atmosphere. The system was then stirred at 100 °C for 6 hours. After consumption of the 1,4-disubstitued 1,2,3-triazoles and *N*-tosylhydrazones monitored by TLC analysis, the mixture was added with H<sub>2</sub>O (15 mL) and extracted with EtOAc (3 × 15 mL), and the combined organic layer was washed with brine (3 × 5 mL), dried over Na<sub>2</sub>SO<sub>4</sub> and concentrated under reduced pressure to afford a crude product. Purification by column chromatography on silica gel afforded the desired products **3** or **4**.

## 5. Spectral Data of the Compounds

### 1-(2-Ethynylphenyl)-4-(*p*-tolyl)-1*H*-1,2,3-triazole (1a)

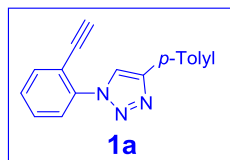

Yield: 932.79 mg (72%); yellow solid;  $^1\text{H}$  NMR (600 MHz,  $\text{CDCl}_3$ )  $\delta$  8.45 (s, 1H), 7.80 (d,  $J = 8.1$  Hz, 2H), 7.78 (d,  $J = 8.1$  Hz, 1H), 7.69 (dd,  $J = 7.8, 1.3$  Hz, 1H), 7.54 (t,  $J = 7.9, 1.4$  Hz, 1H), 7.45 (t,  $J = 7.6, 1.1$  Hz, 1H), 7.27 (d,  $J = 7.9$  Hz, 2H), 3.29 (s, 1H), 2.40 (s, 3H);  $^{13}\text{C}$  NMR (150 MHz,  $\text{CDCl}_3$ )  $\delta$  147.64, 138.50, 138.32, 134.54, 130.31, 129.70, 129.07, 127.65, 125.90, 125.29, 120.68, 116.26, 83.93, 79.27, 77.37, 77.16, 76.95, 21.45; HRMS (ESI) calcd for  $\text{C}_{17}\text{H}_{14}\text{N}_3$  [(M + H) $^+$ ]: 260.1182, found 260.1180.

### 1-(2-Ethynylphenyl)-4-(*o*-tolyl)-1*H*-1,2,3-triazole (1b)

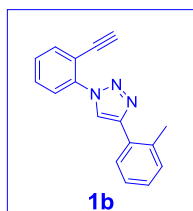

Yield: 1063.2 mg (82%); white solid;  $^1\text{H}$  NMR (600 MHz,  $\text{CDCl}_3$ )  $\delta$  8.32 (s, 1H), 7.79 (d,  $J = 6.9$  Hz, 1H), 7.71 (d,  $J = 8.1$  Hz, 1H), 7.56 (dd,  $J = 7.8, 1.1$  Hz, 1H), 7.42 (dd,  $J = 11.1, 4.5$  Hz, 1H), 7.32 (td,  $J = 7.7, 1.1$  Hz, 1H), 7.18 (t,  $J = 3.7$  Hz, 2H), 3.20 (s, 1H), 2.41 (s, 3H);  $^{13}\text{C}$  NMR (151 MHz,  $\text{CDCl}_3$ )  $\delta$  146.45, 138.17, 135.48, 134.42, 130.92, 130.24, 129.63, 128.90, 128.29, 126.18, 125.00, 123.14, 115.89, 83.88, 79.28, 21.39; HRMS (ESI) calcd for  $\text{C}_{17}\text{H}_{14}\text{N}_3$  [(M + H) $^+$ ]: 260.1182, found 260.1184.

### 1-(2-Ethynylphenyl)-4-(*m*-tolyl)-1*H*-1,2,3-triazole (1c)

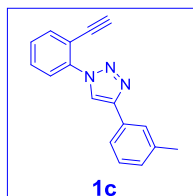

Yield: 1011.3 mg (78%); white solid;  $^1\text{H}$  NMR (600 MHz,  $\text{CDCl}_3$ )  $\delta$  8.36 (s, 1H), 7.68 – 7.62 (m, 2H), 7.57 (t,  $J = 7.6$  Hz, 2H), 7.41 (dd,  $J = 11.3, 4.3$  Hz, 1H), 7.32 (dd,  $J = 11.1, 4.2$  Hz, 1H), 7.23 (t,  $J = 7.6$  Hz, 1H), 7.06 (d,  $J = 7.6$  Hz, 1H), 3.19 (s, 1H), 2.31 (s, 3H);  $^{13}\text{C}$  NMR (151 MHz,  $\text{CDCl}_3$ )  $\delta$  146.48, 137.57, 137.26, 133.39, 129.17 (d,  $J = 6.1$  Hz), 128.04 (d,  $J = 14.3$  Hz), 127.79, 125.49, 124.11, 121.95, 119.91, 115.15, 82.92, 78.08, 20.46; HRMS (ESI) calcd for  $\text{C}_{17}\text{H}_{14}\text{N}_3$  [(M + H) $^+$ ]: 260.1182, found 260.1182.

### 1-(2-Ethynylphenyl)-4-(4-methoxyphenyl)-1*H*-1,2,3-triazole (1d)

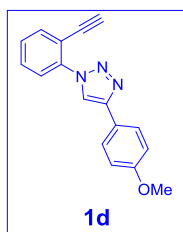

Yield: 1087.5 mg (79%); white solid;  $^1\text{H}$  NMR (600 MHz,  $\text{CDCl}_3$ )  $\delta$  8.33 (s, 1H), 7.78 – 7.73 (m, 2H), 7.69 (dd,  $J = 8.1, 0.8$  Hz, 1H), 7.61 (dd,  $J = 7.8, 1.3$  Hz, 1H), 7.46 (td,  $J = 7.9, 1.4$  Hz, 1H), 7.37 (td,  $J = 7.7, 1.2$  Hz, 1H), 6.94 – 6.88 (m, 2H), 3.77 (s, 3H), 3.22 (s, 1H);  $^{13}\text{C}$  NMR (151 MHz,  $\text{CDCl}_3$ )  $\delta$  159.79, 147.40, 138.47, 134.53, 130.29, 129.04, 127.28, 125.24, 123.12, 120.20, 116.22, 114.38, 83.92, 79.26, 55.44; HRMS (ESI) calcd for  $\text{C}_{17}\text{H}_{14}\text{N}_3\text{O}$  [(M + H) $^+$ ]: 276.1131, found 276.1138.

### 4-(2-Chlorophenyl)-1-(2-ethynylphenyl)-1*H*-1,2,3-triazole (1e)

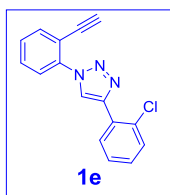

Yield: 979.0 mg (79%); white solid;  $^1\text{H}$  NMR (600 MHz,  $\text{CDCl}_3$ )  $\delta$  8.85 (s, 1H), 8.22 (dd,  $J = 7.8, 1.5$  Hz, 1H), 7.70 (d,  $J = 8.0$  Hz, 1H), 7.58 (d,  $J = 7.7$  Hz, 1H), 7.44 (dd,  $J = 11.4, 4.1$  Hz, 1H), 7.38 – 7.31 (m, 2H), 7.31 – 7.27 (m, 1H), 7.21 – 7.16 (m, 1H), 3.23 (s, 1H);  $^{13}\text{C}$  NMR (151 MHz,  $\text{CDCl}_3$ )  $\delta$  143.61, 138.15, 134.43, 131.32, 130.27 (d,  $J = 11.1$  Hz), 129.90, 129.21, 129.04 (d,  $J = 4.1$  Hz), 127.25, 125.08, 124.53, 116.15, 84.20, 79.03; HRMS (ESI) calcd for  $\text{C}_{16}\text{H}_{11}\text{ClN}_3$  [(M + H) $^+$ ]: 280.0636, found 280.0632.

#### 4-(3-Chlorophenyl)-1-(2-ethynylphenyl)-1H-1,2,3-triazole (1f)

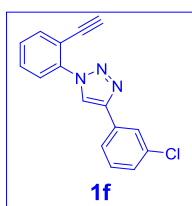

Yield: 951.2mg (68%); white solid;  $^1\text{H}$  NMR (600 MHz,  $\text{CDCl}_3$ )  $\delta$  8.50 (s, 1H), 7.90 (t,  $J = 1.7$  Hz, 1H), 7.79 (dd,  $J = 7.7, 1.0$  Hz, 1H), 7.75 (dd,  $J = 8.1, 0.6$  Hz, 1H), 7.69 (dd,  $J = 7.8, 1.1$  Hz, 1H), 7.54 (td,  $J = 7.8, 1.3$  Hz, 1H), 7.45 (td,  $J = 7.7, 1.1$  Hz, 1H), 7.37 (t,  $J = 7.8$  Hz, 1H), 7.34 – 7.30 (m, 1H), 3.32 (s, 1H);  $^{13}\text{C}$  NMR (151 MHz,  $\text{CDCl}_3$ )  $\delta$  146.14, 138.09, 134.83, 134.50, 132.14, 130.28 (t,  $J = 7.9$  Hz), 129.21, 128.33 (d,  $J = 9.4$  Hz), 125.87, 125.13, 123.96, 121.39 (d,  $J = 9.0$  Hz), 116.18, 84.09, 79.04; HRMS (ESI) calcd for  $\text{C}_{16}\text{H}_{11}\text{ClN}_3$  [(M + H) $^+$ ]: 280.0636, found 280.0635.

#### 1-(2-Ethynylphenyl)-4-(4-fluorophenyl)-1H-1,2,3-triazole (1g)

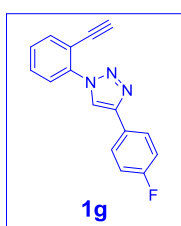

Yield: 961.0 mg (73%); red solid;  $^1\text{H}$  NMR (600 MHz,  $\text{CDCl}_3$ )  $\delta$  8.48 – 8.43 (m, 1H), 7.86 (ddd,  $J = 11.2, 7.2, 4.0$  Hz, 2H), 7.69 (dd,  $J = 11.7, 8.3$  Hz, 1H), 7.63 (t,  $J = 9.4$  Hz, 1H), 7.51 – 7.44 (m, 1H), 7.43 – 7.37 (m, 1H), 7.12 – 7.05 (m, 2H), 3.32 (s, 1H);  $^{13}\text{C}$  NMR (151 MHz,  $\text{CDCl}_3$ )  $\delta$  162.58 (d,  $J = 247.4$  Hz), 146.41, 138.04, 134.36, 130.09, 129.01, 127.50 (d,  $J = 8.1$  Hz), 126.50 (d,  $J = 3.3$  Hz), 124.98, 120.71, 115.77 (d,  $J = 21.7$  Hz), 116.08, 83.98, 78.97; HRMS (ESI) calcd for  $\text{C}_{16}\text{H}_{11}\text{FN}_3$  [(M + H) $^+$ ]: 264.0932, found 264.0930.

#### 4-(4-Chlorophenyl)-1-(2-ethynylphenyl)-1H-1,2,3-triazole (1h)

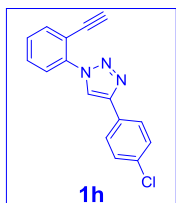

Yield: 993.0mg (80%); white solid;  $^1\text{H}$  NMR (600 MHz,  $\text{CDCl}_3$ )  $\delta$  8.49 (s, 1H), 7.84 (dd,  $J = 8.7, 2.0$  Hz, 2H), 7.76 (d,  $J = 8.0$  Hz, 1H), 7.70 (dd,  $J = 7.7, 1.0$  Hz, 1H), 7.54 (dd,  $J = 7.8, 1.0$  Hz, 1H), 7.47 (dd,  $J = 7.7, 0.8$  Hz, 1H), 7.42 (d,  $J = 8.4$  Hz, 2H), 3.31 (s, 1H).;  $^{13}\text{C}$  NMR (151 MHz,  $\text{CDCl}_3$ )  $\delta$  146.49, 138.25, 134.58, 134.14, 130.34, 129.38 – 129.14 (m), 128.96, 127.19, 125.24, 121.07, 116.25, 84.05, 79.15; HRMS (ESI) calcd for  $\text{C}_{16}\text{H}_{11}\text{ClN}_3$  [(M + H) $^+$ ]: 280.0636, found 280.0634.

#### 4-(4-Bromophenyl)-1-(2-ethynylphenyl)-1H-1,2,3-triazole (1i)

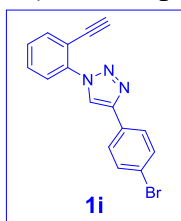

Yield: 1118.4mg (80%); white solid;  $^1\text{H}$  NMR (600 MHz,  $\text{CDCl}_3$ )  $\delta$  8.49 (s, 1H), 7.77 (d,  $J = 8.5$  Hz, 2H), 7.74 (d,  $J = 8.1$  Hz, 1H), 7.68 (d,  $J = 7.7$  Hz, 1H), 7.57 – 7.51 (m, 3H), 7.47 – 7.42 (m, 1H), 3.31 (s, 1H).;  $^{13}\text{C}$  NMR (151 MHz,  $\text{CDCl}_3$ )  $\delta$  146.41, 138.13, 134.51, 132.07,

130.27, 129.34, 129.19, 127.40, 125.14, 122.22, 121.07, 116.17, 84.06, 79.08; HRMS (ESI) calcd for C<sub>16</sub>H<sub>11</sub>BrN<sub>3</sub> [(M + H)<sup>+</sup>]: 324.0131, found 324.0133.

### 2-(1-(2-Ethynylphenyl)-1H-1,2,3-triazol-4-yl)pyridine (1j)

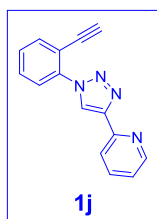

Yield: 923.5 mg (75%); white solid; <sup>1</sup>H NMR (600 MHz, CDCl<sub>3</sub>) δ 8.93 – 8.79 (m, 1H), 8.61 (d, *J* = 4.8 Hz, 1H), 8.25 (dd, *J* = 11.1, 4.1 Hz, 1H), 7.82 – 7.74 (m, 2H), 7.69 (dd, *J* = 11.8, 4.6 Hz, 1H), 7.53 (dd, *J* = 15.9, 8.2 Hz, 1H), 7.48 – 7.41 (m, 1H), 7.23 (dd, *J* = 8.0, 4.3 Hz, 1H), 3.38 (s, 1H); <sup>13</sup>C NMR (151 MHz, CDCl<sub>3</sub>) δ 149.96 (d, *J* = 2.0 Hz), 149.46, 147.98, 138.12, 136.84, 134.35, 130.04, 129.09, 125.09, 123.27, 122.92, 120.32, 116.35 (d, *J* = 1.9 Hz), 84.25, 78.76; HRMS (ESI) calcd for C<sub>15</sub>H<sub>11</sub>N<sub>4</sub> [(M + H)<sup>+</sup>]: 247.0978, found 247.0983.

### 1-(2-Ethynylphenyl)-4-(thiophen-2-yl)-1H-1,2,3-triazole (1k)

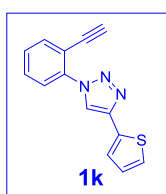

<sup>1</sup>H NMR (600 MHz, CDCl<sub>3</sub>) δ 8.39 (s, 1H), 7.79 (d, *J* = 8.1 Hz, 2H), 7.61 (d, *J* = 8.2 Hz, 1H), 7.46 (d, *J* = 0.9 Hz, 1H), 7.30 (dd, *J* = 8.2, 1.3 Hz, 1H), 7.24 (d, *J* = 7.9 Hz, 2H), 3.24 (s, 1H), 2.38 (s, 3H), 2.38 (s, 3H); <sup>13</sup>C NMR (151 MHz, CDCl<sub>3</sub>) δ 142.64, 138.16, 134.51, 132.64, 130.29, 129.24, 127.79, 125.38, 125.29, 124.55, 120.43, 116.32, 84.10, 79.03; HRMS (ESI) calcd for C<sub>14</sub>H<sub>10</sub>N<sub>3</sub>S [(M + H)<sup>+</sup>]: 252.0590, found 252.0582.

### 4-Cyclopropyl-1-(2-ethynylphenyl)-1H-1,2,3-triazole (1l)

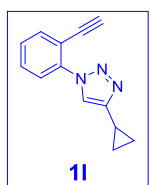

Yield: 680.1 mg (80%); red liquid; <sup>1</sup>H NMR (600 MHz, CDCl<sub>3</sub>) δ 7.98 (dd, *J* = 2.9, 2.2 Hz, 1H), 7.70 – 7.59 (m, 2H), 7.51 – 7.44 (m, 1H), 7.42 – 7.35 (m, 1H), 3.32 (d, *J* = 1.4 Hz, 1H), 2.03 (ddd, *J* = 8.1, 6.4, 3.3 Hz, 1H), 1.02 – 0.96 (m, 2H), 0.93 (d, *J* = 1.6 Hz, 2H); <sup>13</sup>C NMR (151 MHz, CDCl<sub>3</sub>) δ 149.63, 138.28, 134.24, 129.96, 128.59, 124.91, 121.07, 115.85, 83.66, 79.06, 7.76, 6.58; HRMS (ESI) calcd for C<sub>13</sub>H<sub>12</sub>N<sub>3</sub> [(M + H)<sup>+</sup>]: 210.1026, found 210.1020.

### 1-(2-Ethynylphenyl)-1H-1,2,3-triazole (1m)

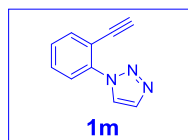

Yield: 507.6 mg (60%); white solid; <sup>1</sup>H NMR (600 MHz, CDCl<sub>3</sub>) δ 8.31 (s, 1H), 7.83 (d, *J* = 3.3 Hz, 1H), 7.74 – 7.69 (m, 1H), 7.67 (d, *J* = 7.7 Hz, 1H), 7.52 (dt, *J* = 7.2, 6.4 Hz, 1H), 7.46 – 7.42 (m, 1H), 3.30 (s, 1H); <sup>13</sup>C NMR (151 MHz, CDCl<sub>3</sub>) δ 138.15, 134.47, 134.29, 134.08, 133.36, 130.08, 129.09, 128.96, 125.17, 124.99, 116.21, 83.78, 78.89; HRMS (ESI) calcd for C<sub>10</sub>H<sub>8</sub>N<sub>3</sub> [(M + H)<sup>+</sup>]: 170.0713, found 170.0709.

### 1-(2-Ethynyl-4-methylphenyl)-4-(*p*-tolyl)-1H-1,2,3-triazole (1n)

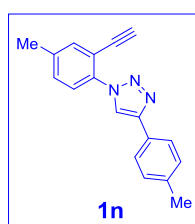

<sup>1</sup>H NMR (600 MHz, CDCl<sub>3</sub>) δ 8.39 (s, 1H), 7.79 (d, *J* = 8.1 Hz, 2H), 7.61 (d, *J* = 8.2 Hz, 1H), 7.46 (d, *J* = 0.9 Hz, 1H), 7.30 (dd, *J* = 8.2, 1.3 Hz, 1H), 7.24 (d, *J* = 7.9 Hz, 2H), 3.24 (s, 1H), 2.38 (s, 3H), 2.38 (s, 3H); <sup>13</sup>C NMR (151 MHz, CDCl<sub>3</sub>) δ 147.40, 139.25, 138.12,

136.07, 134.68, 130.98, 129.59, 127.64, 125.77, 124.97, 120.64, 115.88, 83.37, 79.32, 21.37, 20.94; HRMS (ESI) calcd for C<sub>18</sub>H<sub>16</sub>N<sub>3</sub> [(M + H)<sup>+</sup>]: 274.1339, found 274.1341.

#### 1-(4-Chloro-2-ethynylphenyl)-4-(*p*-tolyl)-1*H*-1,2,3-triazole (1o)

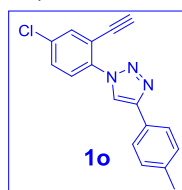

Yield: 851.9 mg (58%); white solid; <sup>1</sup>H NMR (600 MHz, CDCl<sub>3</sub>) δ 8.34 (s, 1H), 7.68 (d, *J* = 8.1 Hz, 2H), 7.61 (dd, *J* = 8.6, 3.2 Hz, 1H), 7.55 (d, *J* = 2.3 Hz, 1H), 7.39 (dd, *J* = 8.6, 2.3 Hz, 1H), 7.16 (d, *J* = 7.9 Hz, 2H), 3.26 (s, 1H), 2.29 (s, 3H); <sup>13</sup>C NMR (151 MHz, CDCl<sub>3</sub>) δ 147.75, 138.40, 136.89, 134.75, 134.02, 130.50, 129.67, 127.35, 126.32, 125.84, 120.43, 117.46, 85.16, 78.04, 21.41; HRMS (ESI) calcd for C<sub>17</sub>H<sub>13</sub>ClN<sub>3</sub> [(M + H)<sup>+</sup>]: 294.0793, found 294.0787.

#### 1-(2-Ethynylphenyl)-4-phenyl-1*H*-1,2,3-triazole (1p)

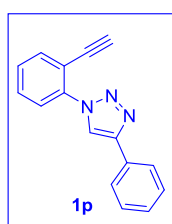

Yield: 981.1 mg (80%); white solid; <sup>1</sup>H NMR (600 MHz, CDCl<sub>3</sub>) δ 8.38 (s, 1H), 7.81 (dd, *J* = 8.2, 1.1 Hz, 2H), 7.64 (d, *J* = 8.0 Hz, 1H), 7.57 (dd, *J* = 7.7, 1.2 Hz, 1H), 7.41 (td, *J* = 7.9, 1.4 Hz, 1H), 7.37 – 7.30 (m, 3H), 7.27 – 7.22 (m, 1H), 3.19 (s, 1H); <sup>13</sup>C NMR (151 MHz, CDCl<sub>3</sub>) δ 147.38, 138.24, 134.41, 130.33, 130.18, 128.97 (d, *J* = 18.7 Hz), 128.32, 125.84, 125.11, 120.96, 116.15, 83.95, 79.08; HRMS (ESI) calcd for C<sub>16</sub>H<sub>12</sub>N<sub>3</sub> [(M + H)<sup>+</sup>]: 246.1026, found 246.1031.

#### 4-Benzyl-3-(*p*-tolyl)-[1,2,3]triazolo[1,5-*a*]quinoline (3a)

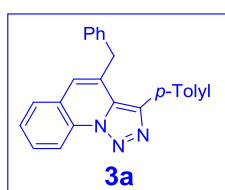

Yield: 62.9 mg (60%); Light yellow solid; Mp. 188.8-189.7 °C; <sup>1</sup>H NMR (600 MHz, CDCl<sub>3</sub>) δ 8.72 (d, *J* = 8.6 Hz, 1H), 7.62 (t, *J* = 7.1 Hz, 2H), 7.46 (t, *J* = 7.6 Hz, 1H), 7.30 (d, *J* = 8.0 Hz, 2H), 7.14 (d, *J* = 7.8 Hz, 2H), 7.12 – 7.08 (m, 3H), 6.97 (s, 1H), 6.80 (dd, *J* = 7.1, 2.3 Hz, 2H), 3.94 (s, 2H), 2.35 (s, 3H); <sup>13</sup>C NMR (150 MHz, CDCl<sub>3</sub>) δ 141.67, 138.42, 137.86, 131.17, 130.57, 129.53, 129.43, 129.24, 129.20, 129.09, 128.93, 128.55, 128.02, 127.16, 126.65, 125.75, 124.24, 116.31, 77.37, 77.16, 76.95, 38.17, 21.50; IR (KBr): 2919, 1544, 1457, 1255, 1214, 1163, 1030, 995, 824, 750, 703, 558, 513 cm<sup>-1</sup>; HRMS (ESI) calcd for C<sub>24</sub>H<sub>20</sub>N<sub>3</sub> [(M + H)<sup>+</sup>]: 350.1652, found 350.1650.

#### 4-(2-Methylbenzyl)-3-(*p*-tolyl)-[1,2,3]triazolo[1,5-*a*]quinoline (3b)

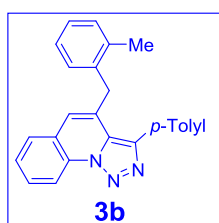

Yield: 83.9 mg (77%); Light yellow solid; Mp. 182.8-183.6 °C; <sup>1</sup>H NMR (600 MHz, CDCl<sub>3</sub>) δ 8.81 (d, *J* = 8.4 Hz, 1H), 7.69 (t, *J* = 8.4, 7.3, 1.3 Hz, 1H), 7.65 – 7.61 (m, 1H), 7.55 – 7.49 (m, 1H), 7.44 – 7.36 (m, 2H), 7.21 (d, *J* = 7.8 Hz, 2H), 7.18 (dd, *J* = 4.6, 2.8 Hz, 1H), 7.16 – 7.11 (m, 2H), 6.99 (d, *J* = 7.5 Hz, 1H), 6.83 (s, 1H), 3.90 (s, 2H), 2.40 (s, 3H), 2.00 (s, 3H); <sup>13</sup>C NMR (150 MHz, CDCl<sub>3</sub>) δ 141.66, 138.43, 136.85, 136.16, 131.09, 130.43, 130.42, 129.85, 129.38, 129.33, 129.16, 128.94, 128.89, 128.02, 127.15, 127.11, 126.26, 124.81, 124.29, 116.26, 77.37, 77.16, 76.95, 36.02, 21.44, 19.34; IR (KBr): 2955, 2911, 1558, 1462, 1430, 1388, 1329, 1242, 1209, 1155, 1112, 1022, 993, 950, 897, 851, 818, 747, 624,

561, 509  $\text{cm}^{-1}$ ; HRMS (ESI) calcd for  $\text{C}_{25}\text{H}_{22}\text{N}_3$   $[(\text{M} + \text{H})^+]$ : 364.1808, found 364.1810.

#### 4-(3-Methylbenzyl)-3-(*p*-tolyl)-[1,2,3]triazolo[1,5-*a*]quinoline (3c)

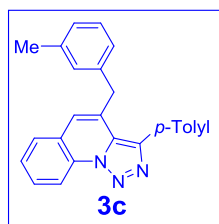

Yield: 82.9 mg (76%); Light yellow solid; Mp. 149.6-150.7  $^{\circ}\text{C}$ ;  $^1\text{H}$  NMR (600 MHz,  $\text{CDCl}_3$ )  $\delta$  8.82 (d,  $J = 8.3$  Hz, 1H), 7.72 (dd,  $J = 15.8, 7.5$  Hz, 2H), 7.59 – 7.54 (m, 1H), 7.37 (d,  $J = 8.0$  Hz, 2H), 7.24 (d,  $J = 7.8$  Hz, 2H), 7.10 (s, 1H), 7.07 (t,  $J = 7.6$  Hz, 1H), 6.98 (d,  $J = 7.6$  Hz, 1H), 6.68 (d,  $J = 7.6$  Hz, 1H), 6.60 (s, 1H), 3.99 (s, 2H), 2.44 (s, 3H), 2.22 (s, 3H);  $^{13}\text{C}$  NMR (150 MHz,  $\text{CDCl}_3$ )  $\delta$  141.69, 138.38, 138.15, 137.77, 131.22, 130.64, 129.90, 129.66, 129.42, 129.29, 129.26, 128.92, 128.38, 128.05, 127.35, 127.17, 125.97, 125.75, 124.30, 116.36, 77.37, 77.16, 76.95, 38.20, 21.52, 21.47; IR (KBr): 2910, 2860, 1463, 1243, 1160, 1110, 1029, 990, 948, 902, 858, 817, 756, 693, 560, 509  $\text{cm}^{-1}$ ; HRMS (ESI) calcd for  $\text{C}_{25}\text{H}_{22}\text{N}_3$   $[(\text{M} + \text{H})^+]$ : 364.1808, found 364.1806.

#### 4-(4-Methylbenzyl)-3-(*p*-tolyl)-[1,2,3]triazolo[1,5-*a*]quinoline (3d)

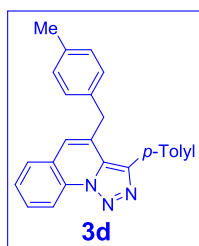

Yield: 85.1 mg (78%); Light yellow solid; Mp. 162.5-163.4  $^{\circ}\text{C}$ ;  $^1\text{H}$  NMR (600 MHz,  $\text{CDCl}_3$ )  $\delta$  8.81 (d,  $J = 8.6$  Hz, 1H), 7.73 – 7.67 (m, 2H), 7.57 – 7.52 (m, 1H), 7.41 (d,  $J = 8.0$  Hz, 2H), 7.24 (d,  $J = 7.8$  Hz, 2H), 7.05 (s, 1H), 7.02 (d,  $J = 7.8$  Hz, 2H), 6.80 (d,  $J = 7.9$  Hz, 2H), 3.98 (s, 2H), 2.43 (s, 3H), 2.30 (s, 3H);  $^{13}\text{C}$  NMR (150 MHz,  $\text{CDCl}_3$ )  $\delta$  141.66, 138.42, 136.25, 134.75, 132.19, 131.14, 130.62, 129.95, 129.36, 129.27, 129.06, 128.94, 128.02, 127.51, 127.13, 125.55, 124.31, 116.32, 77.37, 77.16, 76.95, 37.73, 21.51, 21.17.; IR (KBr): 2919, 1454, 1298, 1220, 1167, 1106, 1038, 948, 913, 825, 755, 560  $\text{cm}^{-1}$ ; HRMS (ESI) calcd for  $\text{C}_{25}\text{H}_{22}\text{N}_3$   $[(\text{M} + \text{H})^+]$ : 364.1808, found 364.1807.

#### 4-(2-Methoxybenzyl)-3-(*p*-tolyl)-[1,2,3]triazolo[1,5-*a*]quinoline (3e)

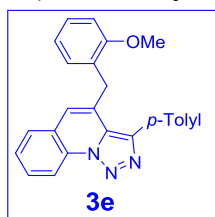

Yield: 75.1 mg (66%); Light yellow solid; Mp. 191.6-192.5  $^{\circ}\text{C}$ ;  $^1\text{H}$  NMR (600 MHz,  $\text{CDCl}_3$ )  $\delta$  8.81 (d,  $J = 8.3$  Hz, 1H), 7.71 – 7.62 (m, 2H), 7.54 – 7.49 (m, 1H), 7.41 (d,  $J = 8.0$  Hz, 2H), 7.24 – 7.17 (m, 3H), 6.95 (s, 1H), 6.88 (dd,  $J = 7.4, 1.5$  Hz, 1H), 6.83 (t,  $J = 7.4$  Hz, 1H), 6.80 (d,  $J = 8.2$  Hz, 1H), 3.97 (s, 2H), 3.66 (s, 3H), 2.40 (s, 3H);  $^{13}\text{C}$  NMR (150 MHz,  $\text{CDCl}_3$ )  $\delta$  157.36, 141.68, 138.04, 131.10, 130.46, 130.42, 129.45, 129.36, 129.27, 129.13, 128.78, 128.20, 127.95, 127.01, 126.38, 124.88, 124.42, 120.49, 116.26, 110.24, 77.37, 77.16, 76.95, 55.21, 32.61, 21.49; IR (KBr): 2909, 1603, 1551, 1461, 1323, 1284, 1247, 1157, 1110, 1027, 990, 941, 824, 753, 645, 557  $\text{cm}^{-1}$ ; HRMS (ESI) calcd for  $\text{C}_{25}\text{H}_{22}\text{N}_3\text{O}$   $[(\text{M} + \text{H})^+]$ : 380.1757, found 380.1754.

#### 4-(3-Methoxybenzyl)-3-(*p*-tolyl)-[1,2,3]triazolo[1,5-*a*]quinoline (3f)

Yield: 69.4 mg (61%); Light yellow solid; Mp. 163.8-165.4  $^{\circ}\text{C}$ ;  $^1\text{H}$  NMR (600 MHz,  $\text{CDCl}_3$ )  $\delta$  8.82 (d,  $J = 8.2$  Hz, 1H), 7.76 – 7.68 (m, 2H), 7.60 – 7.53 (m, 1H), 7.38 (d,



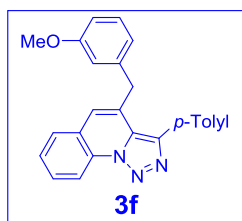

$J = 7.9$  Hz, 2H), 7.23 (d,  $J = 7.8$  Hz, 2H), 7.14 – 7.08 (m, 2H), 6.73 (dd,  $J = 8.2, 2.3$  Hz, 1H), 6.48 (d,  $J = 7.6$  Hz, 1H), 6.41 (s, 1H), 4.01 (s, 2H), 3.71 (s, 3H), 2.43 (s, 3H);  $^{13}\text{C}$  NMR (150 MHz,  $\text{CDCl}_3$ )  $\delta$  159.77, 141.67, 139.49, 138.42, 131.23, 130.59, 129.52, 129.48, 129.30, 129.25, 129.21, 128.95, 128.07, 127.19, 125.85, 124.27, 121.39, 116.37, 114.80, 112.00, 77.37, 77.16, 76.95, 55.23, 38.23, 21.51; IR (KBr): 2922, 1729, 1593, 1462, 1256, 1159, 1038, 950, 909, 865, 822, 759, 697, 551  $\text{cm}^{-1}$ ; HRMS (ESI) calcd for  $\text{C}_{25}\text{H}_{22}\text{N}_3\text{O}$   $[(\text{M} + \text{H})^+]$ : 380.1757, found 380.1759.

#### 4-(4-Methoxybenzyl)-3-(*p*-tolyl)-[1,2,3]triazolo[1,5-*a*]quinoline (3g)

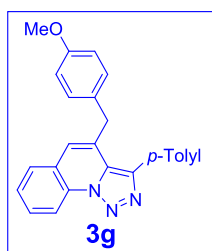

Yield: 76.3 mg (67%); Light yellow solid; Mp. 166.2-163.2 °C;  $^1\text{H}$  NMR (600 MHz,  $\text{CDCl}_3$ )  $\delta$  8.81 (d,  $J = 8.6$  Hz, 1H), 7.74 – 7.67 (m, 2H), 7.55 (t,  $J = 7.6$  Hz, 1H), 7.43 – 7.38 (m, 2H), 7.25 (d,  $J = 7.7$  Hz, 2H), 7.05 (s, 1H), 6.83 – 6.78 (m, 2H), 6.76 – 6.72 (m, 2H), 3.96 (s, 2H), 3.78 (s, 3H), 2.44 (s, 3H);  $^{13}\text{C}$  NMR (150 MHz,  $\text{CDCl}_3$ )  $\delta$  158.37, 141.67, 138.43, 131.17, 130.62, 130.16, 130.10, 129.82, 129.39, 129.29, 129.27, 128.95, 128.92, 128.03, 127.16, 125.50, 124.31, 116.35, 113.96, 77.37, 77.16, 76.95, 55.40, 37.37, 21.53; IR (KBr): 2969, 2915, 2843, 1507, 1457, 1302, 1244, 1178, 1093, 1039, 954, 887, 817, 758, 600, 556  $\text{cm}^{-1}$ ; HRMS (ESI) calcd for  $\text{C}_{25}\text{H}_{22}\text{N}_3\text{O}$   $[(\text{M} + \text{H})^+]$ : 380.1757, found 380.1755.

#### 4-(4-Isopropylbenzyl)-3-(*p*-tolyl)-[1,2,3]triazolo[1,5-*a*]quinoline (3h)

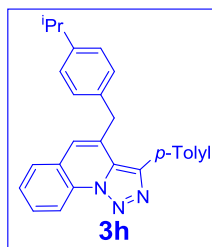

Yield: 79.9 mg (68%); Light yellow solid; Mp. 167.4-168.2 °C;  $^1\text{H}$  NMR (600 MHz,  $\text{CDCl}_3$ )  $\delta$  8.80 (d,  $J = 8.2$  Hz, 1H), 7.74 – 7.65 (m, 2H), 7.57 – 7.50 (m, 1H), 7.38 (d,  $J = 8.0$  Hz, 2H), 7.22 (d,  $J = 7.8$  Hz, 2H), 7.10 – 7.00 (m, 3H), 6.80 (d,  $J = 8.1$  Hz, 2H), 3.99 (s, 2H), 2.85 (m, 1H), 2.42 (s, 3H), 1.22 (d,  $J = 6.9$  Hz, 6H);  $^{13}\text{C}$  NMR (150 MHz,  $\text{CDCl}_3$ )  $\delta$  147.26, 141.67, 138.34, 135.13, 131.14, 130.57, 129.83, 129.33, 129.29, 129.24, 129.02, 128.89, 128.02, 127.10, 126.57, 125.58, 124.29, 116.29, 77.37, 77.16, 76.95, 37.81, 33.80, 24.15, 21.49; IR (KBr): 2965, 1908, 1507, 1460, 1296, 1102, 1042, 1003, 944, 898, 863, 815, 756, 560  $\text{cm}^{-1}$ ; HRMS (ESI) calcd for  $\text{C}_{27}\text{H}_{26}\text{N}_3$   $[(\text{M} + \text{H})^+]$ : 392.2121, found 392.2123.

#### 4-(4-Fluorobenzyl)-3-(*p*-tolyl)-[1,2,3]triazolo[1,5-*a*]quinoline (3i)

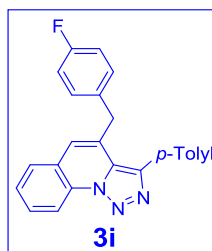

Yield: 57.3 mg (52%); Light yellow solid; Mp. 197.4-198.2 °C;  $^1\text{H}$  NMR (600 MHz,  $\text{CDCl}_3$ )  $\delta$  8.81 (d,  $J = 8.1$  Hz, 1H), 7.76 – 7.68 (m, 2H), 7.57 (t,  $J = 7.0$  Hz, 1H), 7.35 (d,  $J = 8.0$  Hz, 2H), 7.23 (d,  $J = 7.7$  Hz, 2H), 7.08 (s, 1H), 6.90 – 6.81 (m, 2H), 6.81 – 6.74 (m, 2H), 4.00 (s, 2H), 2.44 (s, 3H);  $^{13}\text{C}$  NMR (150 MHz,  $\text{CDCl}_3$ )  $\delta$  161.63 (d,  $J = 244.9$  Hz), 141.62, 138.47, 133.46 (d,  $J = 3.2$  Hz), 131.21, 130.53, 130.37 (d,  $J = 7.9$  Hz), 129.56, 129.17 (d,  $J = 11.6$  Hz), 129.05, 128.92, 128.02, 127.23, 125.82, 124.13, 116.32, 115.34, 115.20,

37.44, 21.49; IR (KBr): 2922, 1608, 1548, 1507, 1463, 1298, 1228, 1158, 1096, 1043, 1001, 955, 923, 888, 859, 820, 759, 597, 511  $\text{cm}^{-1}$ ; HRMS (ESI) calcd for  $\text{C}_{24}\text{H}_{19}\text{FN}_3$   $[(\text{M} + \text{H})^+]$ : 368.01558, found 368.1555.

#### 4-(2-Chlorobenzyl)-3-(*p*-tolyl)-[1,2,3]triazolo[1,5-*a*]quinoline (3j)

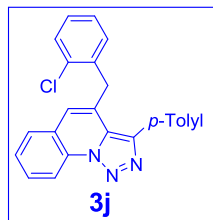

Yield: 54.1 mg (47%); Light yellow solid; Mp. 164.2-165.9  $^{\circ}\text{C}$ ;  $^1\text{H}$  NMR (600 MHz,  $\text{CDCl}_3$ )  $\delta$  8.82 (d,  $J = 8.3$  Hz, 1H), 7.74 – 7.69 (m, 1H), 7.66 (d,  $J = 7.9$  Hz, 1H), 7.56 – 7.51 (m, 1H), 7.39 (d,  $J = 8.0$  Hz, 2H), 7.33 (dd,  $J = 7.9, 1.2$  Hz, 1H), 7.20 (dd,  $J = 11.8, 4.8$  Hz, 3H), 7.16 (t,  $J = 6.8$  Hz, 1H), 7.00 (dd,  $J = 7.5, 1.5$  Hz, 1H), 6.88 (s, 1H), 4.06 (s, 2H), 2.41 (s, 3H);  $^{13}\text{C}$  NMR (150 MHz,  $\text{CDCl}_3$ )  $\delta$  141.75, 138.45, 135.82, 134.65, 131.22, 131.05, 130.34, 129.69, 129.51, 129.18, 128.98, 128.96, 128.45, 128.09, 127.94, 127.17, 127.03, 125.15, 124.22, 116.32, 36.09, 21.48; IR (KBr): 2913, 1919, 1468, 1298, 1240, 1165, 1097, 1043, 993, 945, 828, 756, 686, 567, 521  $\text{cm}^{-1}$ ; HRMS (ESI) calcd for  $\text{C}_{24}\text{H}_{19}\text{ClN}_3$   $[(\text{M} + \text{H})^+]$ : 384.1262, found 384.1265.

#### 4-(3-chlorobenzyl)-3-(*p*-tolyl)-[1,2,3]triazolo[1,5-*a*]quinoline (3k)

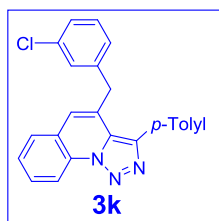

Yield: 62.2 mg (54%); Light yellow solid; Mp. 204.6-206.0  $^{\circ}\text{C}$ ;  $^1\text{H}$  NMR (600 MHz,  $\text{CDCl}_3$ )  $\delta$  8.83 (d,  $J = 8.3$  Hz, 1H), 7.77 (d,  $J = 7.8$  Hz, 1H), 7.76 – 7.70 (m, 1H), 7.63 – 7.56 (m, 1H), 7.28 (t,  $J = 8.3$  Hz, 2H), 7.23 (d,  $J = 7.8$  Hz, 2H), 7.17 (s, 1H), 7.11 (d,  $J = 8.4$  Hz, 1H), 7.05 (t,  $J = 7.7$  Hz, 1H), 6.66 (d,  $J = 8.6$  Hz, 2H), 4.02 (s, 2H), 2.45 (s, 3H);  $^{13}\text{C}$  NMR (150 MHz,  $\text{CDCl}_3$ )  $\delta$  141.70, 139.89, 138.67, 134.25, 131.38, 130.52, 129.72, 129.59, 128.99, 128.95, 128.94, 128.34, 128.11, 127.31, 126.73, 126.72, 126.27, 124.10, 116.41, 77.37, 77.16, 76.95, 38.01, 21.55; IR (KBr): 2916, 1463, 1295, 946, 758  $\text{cm}^{-1}$ ; HRMS (ESI) calcd for  $\text{C}_{24}\text{H}_{19}\text{ClN}_3$   $[(\text{M} + \text{H})^+]$ : 384.1262, found 384.1260.

#### 4-(4-Chlorobenzyl)-3-(*p*-tolyl)-[1,2,3]triazolo[1,5-*a*]quinoline (3l)

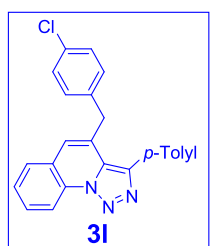

Yield: 53.0 mg (46%); Light yellow solid; Mp. 185.5-187.2  $^{\circ}\text{C}$ ;  $^1\text{H}$  NMR (600 MHz,  $\text{CDCl}_3$ )  $\delta$  8.81 (d,  $J = 8.3$  Hz, 1H), 7.73 (t,  $J = 8.1$  Hz, 2H), 7.58 (dd,  $J = 11.0, 4.0$  Hz, 1H), 7.34 (d,  $J = 7.9$  Hz, 2H), 7.23 (d,  $J = 7.8$  Hz, 2H), 7.12 (d,  $J = 8.4$  Hz, 2H), 7.09 (s, 1H), 6.75 (d,  $J = 8.3$  Hz, 2H), 4.00 (s, 2H), 2.44 (s, 3H);  $^{13}\text{C}$  NMR (150 MHz,  $\text{CDCl}_3$ )  $\delta$  141.64, 138.55, 136.35, 132.44, 131.27, 130.56, 130.27, 129.65, 129.10, 129.03, 128.96, 128.85, 128.59, 128.55, 128.05, 127.28, 125.96, 124.12, 116.37, 77.37, 77.16, 76.95, 37.59, 21.52; IR (KBr): 2918, 2852, 1083, 1538, 1459, 1297, 1252, 1213, 1165, 1096, 1003, 957, 912, 869, 800, 751, 727, 665  $\text{cm}^{-1}$ ; HRMS (ESI) calcd for  $\text{C}_{24}\text{H}_{19}\text{ClN}_3$   $[(\text{M} + \text{H})^+]$ : 384.1262, found 384.1264.

#### 4-(2-Bromobenzyl)-3-(*p*-tolyl)-[1,2,3]triazolo[1,5-*a*]quinoline (3m)

Yield: 57.8 mg (45%); Light yellow solid; Mp. 179.6-180.7  $^{\circ}\text{C}$ ;  $^1\text{H}$  NMR (600 MHz,

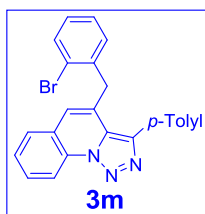

CDCl<sub>3</sub>) δ 8.83 (d, *J* = 8.4 Hz, 1H), 7.74 – 7.69 (m, 1H), 7.67 (d, *J* = 7.9 Hz, 1H), 7.58 – 7.48 (m, 2H), 7.39 (d, *J* = 8.0 Hz, 2H), 7.22 (t, *J* = 5.8 Hz, 3H), 7.13 (t, *J* = 6.9 Hz, 1H), 7.02 (dd, *J* = 7.6, 1.4 Hz, 1H), 6.87 (s, 1H), 4.06 (s, 2H), 2.41 (s, 3H); <sup>13</sup>C NMR (150 MHz, CDCl<sub>3</sub>) δ 141.78, 138.48, 137.57, 133.04, 131.23, 131.13, 130.36, 129.54, 129.20, 129.02, 128.93, 128.66, 128.12, 128.00, 127.68, 127.19, 125.33, 125.19, 124.24, 116.35, 77.37, 77.16, 76.95, 38.73, 21.50; IR (KBr): 2975, 1919, 1924, 1735, 1462, 1326, 1280, 1211, 1089, 1049, 942, 882, 825, 755, 657, 567 cm<sup>-1</sup>; HRMS (ESI) calcd for C<sub>24</sub>H<sub>19</sub>BrN<sub>3</sub> [(M + H)<sup>+</sup>]: 428.0757, found 428.0754.

#### 4-(4-Bromobenzyl)-3-(*p*-tolyl)-[1,2,3]triazolo[1,5-*a*]quinoline (3n)

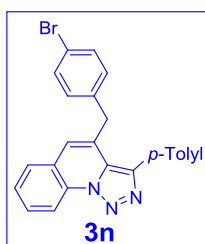

Yield: 51.4 mg (40%); Light yellow solid; Mp. 194.0-195.7 °C; <sup>1</sup>H NMR (600 MHz, CDCl<sub>3</sub>) δ 8.82 (d, *J* = 8.2 Hz, 1H), 7.73 (t, *J* = 8.3 Hz, 2H), 7.58 (t, *J* = 7.6 Hz, 1H), 7.34 (d, *J* = 7.9 Hz, 2H), 7.28 (d, *J* = 8.4 Hz, 2H), 7.23 (d, *J* = 7.8 Hz, 2H), 7.09 (s, 1H), 6.69 (d, *J* = 8.3 Hz, 2H), 3.99 (s, 2H), 2.44 (s, 3H); <sup>13</sup>C NMR (150 MHz, CDCl<sub>3</sub>) δ 141.62, 138.54, 136.86, 131.53, 131.25, 130.64, 130.53, 129.64, 129.06, 129.00, 128.94, 128.73, 128.04, 127.27, 125.95, 124.09, 120.49, 116.36, 37.64, 21.50; IR (KBr): 2918, 1923, 1803, 1473, 1298, 1256, 1212, 1165, 1043, 1002, 956, 912, 931, 797, 750 cm<sup>-1</sup>; HRMS (ESI) calcd for C<sub>24</sub>H<sub>19</sub>BrN<sub>3</sub> [(M + H)<sup>+</sup>]: 428.0757, found 428.0759.

#### 2-((3-(*p*-tolyl)-[1,2,3]triazolo[1,5-*a*]quinolin-4-yl)methyl)benzonitrile (3o)

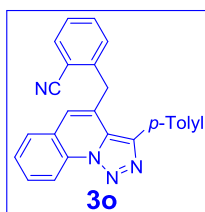

Yield: 33.7 mg (30%); Light yellow solid; Mp. 189.2-190.8 °C; <sup>1</sup>H NMR (600 MHz, CDCl<sub>3</sub>) δ 8.84 (d, *J* = 8.3 Hz, 1H), 7.82 (d, *J* = 7.7 Hz, 1H), 7.80 – 7.73 (m, 1H), 7.67 – 7.58 (m, 1H), 7.38 (d, *J* = 7.7 Hz, 1H), 7.27 (s, 1H), 7.22 (q, *J* = 8.1 Hz, 4H), 7.17 (t, *J* = 7.8 Hz, 1H), 6.93 (d, *J* = 7.9 Hz, 1H), 6.76 (s, 1H), 4.11 (s, 2H), 2.49 (s, 3H); <sup>13</sup>C NMR (150 MHz, CDCl<sub>3</sub>) δ 141.61, 139.38, 139.01, 132.66, 132.31, 131.53, 130.51, 130.16, 130.01, 129.07, 129.05, 128.85, 128.69, 128.14, 127.47, 127.39, 126.75, 123.92, 118.77, 116.47, 112.35, 77.37, 77.16, 76.95, 38.08, 21.55; IR (KBr): 2923, 2856, 2222, 1911, 1841, 1810, 1611, 1552, 1448, 1392, 1262, 1164, 1034, 996, 712, 859, 753, 694, 561 cm<sup>-1</sup>; HRMS (ESI) calcd for C<sub>25</sub>H<sub>19</sub>N<sub>4</sub> [(M + H)<sup>+</sup>]: 375.1604, found 375.1606.

#### 4-((3-(*p*-tolyl)-[1,2,3]triazolo[1,5-*a*]quinolin-4-yl)methyl)benzonitrile (3p)

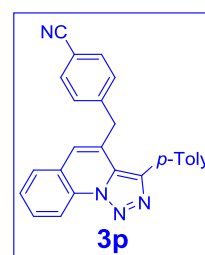

Yield: 33.8 mg (30%); Light yellow solid; Mp. 190.4-191.6 °C; <sup>1</sup>H NMR (600 MHz, CDCl<sub>3</sub>) δ 8.83 (d, *J* = 8.3 Hz, 1H), 7.82 – 7.72 (m, 2H), 7.66 – 7.54 (m, 1H), 7.39 (d, *J* = 8.3 Hz, 2H), 7.25 (d, *J* = 8.0 Hz, 2H), 7.22 – 7.17 (m, 3H), 6.83 (d, *J* = 8.2 Hz, 2H), 4.12 (s, 2H), 2.44 (s, 3H); <sup>13</sup>C NMR (150 MHz, CDCl<sub>3</sub>) δ 143.55, 141.55, 138.62, 132.12, 132.08, 131.38, 130.46, 130.43, 129.93, 129.76, 129.37, 129.33, 128.92, 128.81, 128.71, 128.06, 127.39, 127.31, 126.61, 123.88, 118.88, 116.38, 110.34, 38.33, 21.47; IR (KBr): 2917, 2858, 2221,

1609, 1554, 1504, 1464, 1417, 1383, 1326, 1246, 1204, 1160, 1112, 1070, 1023, 993, 941, 886, 812, 757, 729, 597, 551, 507  $\text{cm}^{-1}$ ; HRMS (ESI) calcd for  $\text{C}_{25}\text{H}_{19}\text{N}_4$  [(M + H)<sup>+</sup>]: 375.1604, found 375.1602.

#### 4-Benzyl-3-phenyl-[1,2,3]triazolo[1,5-a]quinoline (4a)

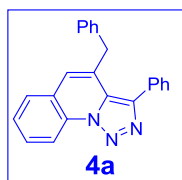

Yield: 56.3 mg (56%); Light yellow solid, Mp. 187.5-189.0 °C; <sup>1</sup>H NMR (600 MHz,  $\text{CDCl}_3$ )  $\delta$  8.83 (d,  $J$  = 8.1 Hz, 1H), 7.72 (dd,  $J$  = 12.4, 4.4 Hz, 2H), 7.57 (t,  $J$  = 7.1 Hz, 1H), 7.51 – 7.46 (m, 2H), 7.46 – 7.39 (m, 3H), 7.17 (dd,  $J$  = 6.6, 3.7 Hz, 3H), 7.12 (s, 1H), 6.83 (dd,  $J$  = 6.5, 3.0 Hz, 2H), 4.03 (s, 2H); <sup>13</sup>C NMR (150 MHz,  $\text{CDCl}_3$ )  $\delta$  141.65, 137.77, 132.19, 131.18, 130.73, 129.52, 129.30, 129.27, 128.95, 128.60, 128.56, 128.23, 128.06, 127.24, 126.63, 126.05, 124.23, 116.36, 77.37, 77.16, 76.95, 38.25; IR (KBr): 2924, 2856, 1951, 1890, 1821, 1605, 1549, 1551, 1393, 1215, 1161, 1072, 990, 920, 854, 751, 700, 565, 510  $\text{cm}^{-1}$ ; HRMS (ESI) calcd for  $\text{C}_{23}\text{H}_{18}\text{N}_3$  [(M + H)<sup>+</sup>]: 336.1495, found 336.1493.

#### 4-benzyl-3-(*o*-tolyl)-[1,2,3]triazolo[1,5-a]quinoline (4b)

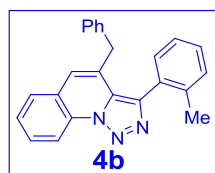

Yield: 80.7 mg (77%); Light yellow solid; Mp. 155.7-157.0 °C; <sup>1</sup>H NMR (600 MHz,  $\text{CDCl}_3$ )  $\delta$  8.83 (d,  $J$  = 8.3 Hz, 1H), 7.76 (d,  $J$  = 8.0 Hz, 1H), 7.73 (t,  $J$  = 7.5 Hz, 1H), 7.58 (t,  $J$  = 7.6 Hz, 1H), 7.35 (t,  $J$  = 7.3 Hz, 1H), 7.25 (t,  $J$  = 5.8 Hz, 1H), 7.24 – 7.20 (m, 2H), 7.16 (s, 1H), 7.15 – 7.09 (m, 3H), 6.69 (d,  $J$  = 6.9 Hz, 2H), 3.87 (s, 2H), 1.91 (s, 3H); <sup>13</sup>C NMR (150 MHz,  $\text{CDCl}_3$ )  $\delta$  140.49, 139.01, 137.70, 131.58, 131.37, 131.30, 130.19, 129.51, 129.49, 129.14, 129.11, 128.69, 128.40, 128.10, 127.22, 126.58, 125.93, 125.38, 124.29, 116.28, 77.37, 77.16, 76.95, 37.92, 20.05; IR (KBr): 2920, 2858, 1919, 1815, 1609, 1542, 1455, 1390, 1326, 1213, 1163, 1117, 1031, 991, 946, 908, 954, 748, 627, 572  $\text{cm}^{-1}$ ; HRMS (ESI) calcd for  $\text{C}_{24}\text{H}_{20}\text{N}_3$  [(M + H)<sup>+</sup>]: 350.1652, found 350.1649.

#### 4-Benzyl-3-(*m*-tolyl)-[1,2,3]triazolo[1,5-a]quinoline (4c)

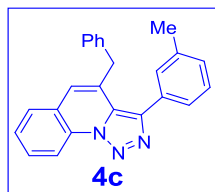

Yield: 76.5 mg (73%); Light yellow solid; Mp. 181.5-182.9 °C; <sup>1</sup>H NMR (600 MHz,  $\text{CDCl}_3$ )  $\delta$  8.82 (d,  $J$  = 8.2 Hz, 1H), 7.75 – 7.68 (m, 2H), 7.56 (dd,  $J$  = 11.0, 4.2 Hz, 1H), 7.33 – 7.26 (m, 2H), 7.24 (d,  $J$  = 8.8 Hz, 2H), 7.20 – 7.15 (m, 3H), 7.12 (s, 1H), 6.83 (dd,  $J$  = 6.5, 2.8 Hz, 2H), 4.04 (s, 2H), 2.35 (s, 3H); <sup>13</sup>C NMR (150 MHz,  $\text{CDCl}_3$ )  $\delta$  141.77, 137.90, 137.87, 131.99, 131.39, 131.18, 129.47, 129.33, 129.24, 129.22, 128.89, 128.50, 128.03, 127.77, 127.19, 126.54, 126.03, 124.22, 116.33, 77.37, 77.16, 76.95, 38.17, 21.50; IR (KBr): 2921, 2856, 1604, 1558, 1492, 1422, 1323, 1240, 1206, 1155, 1107, 1028, 989, 948, 871, 792, 745, 690, 627, 585, 542  $\text{cm}^{-1}$ ; HRMS (ESI) calcd for  $\text{C}_{24}\text{H}_{20}\text{N}_3$  [(M + H)<sup>+</sup>]: 350.1652, found 350.1653.

#### 4-Benzyl-3-(4-methoxyphenyl)-[1,2,3]triazolo[1,5-a]quinoline (4d)

Yield: 72.4 mg (66%); Light yellow solid; Mp. 189.4-190.4 °C; <sup>1</sup>H NMR (600 MHz,  $\text{CDCl}_3$ )  $\delta$  8.80 (d,  $J$  = 8.6 Hz, 1H), 7.70 (dd,  $J$  = 7.8, 6.3 Hz, 2H), 7.59 – 7.49 (m, 1H),

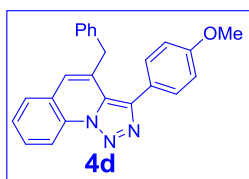

7.42 – 7.36 (m, 2H), 7.22 – 7.14 (m, 3H), 7.07 (s, 1H), 6.96 – 6.92 (m, 2H), 6.87 (dd,  $J = 7.2, 2.0$  Hz, 2H), 4.02 (s, 2H), 3.87 (s, 3H);  $^{13}\text{C}$  NMR (150 MHz,  $\text{CDCl}_3$ )  $\delta$  159.93, 141.35, 137.84, 131.86, 131.14, 129.39, 129.36, 129.20, 128.96, 128.51, 128.00, 127.13, 126.61, 125.77, 124.42, 124.20, 116.24, 113.66, 77.37, 77.16, 76.95, 55.46, 38.12; IR (KBr): 2973, 1915, 1613, 1551, 1464, 1296, 1248, 1171, 1089, 1044, 883, 834, 755, 704, 563  $\text{cm}^{-1}$ ; HRMS (ESI) calcd for  $\text{C}_{24}\text{H}_{20}\text{N}_3\text{O}$   $[(\text{M} + \text{H})^+]$ : 366.1601, found 366.1602.

#### 4-Benzyl-3-(2-chlorophenyl)-[1,2,3]triazolo[1,5-a]quinoline (4e)

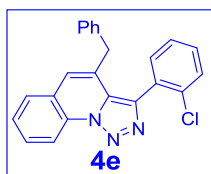

Yield: 61.0 mg (55%); Light yellow solid; Mp. 184.5-186.0  $^{\circ}\text{C}$ ;  $^1\text{H}$  NMR (600 MHz,  $\text{CDCl}_3$ )  $\delta$  8.83 (d,  $J = 8.2$  Hz, 1H), 7.78 – 7.71 (m, 2H), 7.62 – 7.55 (m, 1H), 7.49 (dd,  $J = 8.1, 0.8$  Hz, 1H), 7.43 – 7.36 (m, 1H), 7.33 – 7.23 (m, 2H), 7.20 – 7.11 (m, 4H), 6.80 (dd,  $J = 7.0, 2.4$  Hz, 2H), 3.96 (dd,  $J = 62.9, 16.3$  Hz, 2H);  $^{13}\text{C}$  NMR (150 MHz,  $\text{CDCl}_3$ )  $\delta$  138.27, 137.63, 135.51, 133.14, 131.41, 131.19, 130.44, 130.22, 129.60, 129.49, 129.10, 128.79, 128.57, 128.15, 127.33, 126.73, 126.66, 126.25, 124.32, 116.38, 77.37, 77.16, 76.95, 37.69; IR (KBr): 2920, 1919, 1830, 1801, 1714, 1610, 1553, 1453, 1323, 1217, 1160, 1117, 1034, 996, 948, 916, 742, 698, 662  $\text{cm}^{-1}$ ; HRMS (ESI) calcd for  $\text{C}_{23}\text{H}_{17}\text{ClN}_3$   $[(\text{M} + \text{H})^+]$ : 370.1106, found 370.1104.

#### 4-Benzyl-3-(3-chlorophenyl)-[1,2,3]triazolo[1,5-a]quinoline (4f)

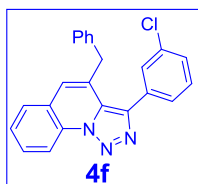

Yield: 54.3 mg (49%); Light yellow solid; Mp. 153.3-154.6  $^{\circ}\text{C}$ ;  $^1\text{H}$  NMR (600 MHz,  $\text{CDCl}_3$ )  $\delta$  8.82 (d,  $J = 8.3$  Hz, 1H), 7.82 – 7.70 (m, 2H), 7.66 – 7.55 (m, 1H), 7.44 – 7.37 (m, 2H), 7.36 – 7.29 (m, 2H), 7.20 (s, 1H), 7.19 – 7.15 (m, 3H), 6.80 (dd,  $J = 6.3, 2.7$  Hz, 2H), 4.05 (s, 2H);  $^{13}\text{C}$  NMR (150 MHz,  $\text{CDCl}_3$ )  $\delta$  140.21, 137.49, 134.11, 133.95, 131.17, 130.69, 129.75, 129.41, 129.40, 128.88, 128.73, 128.70, 128.65, 128.63, 128.15, 127.44, 126.76, 126.72, 124.18, 116.40, 38.44; IR (KBr): 2920, 2859, 1451, 1219, 1158, 1030, 908, 852, 793, 749, 703  $\text{cm}^{-1}$ ; HRMS (ESI) calcd for  $\text{C}_{23}\text{H}_{17}\text{ClN}_3$   $[(\text{M} + \text{H})^+]$ : 370.1106, found 370.1108.

#### 4-Benzyl-3-(4-fluorophenyl)-[1,2,3]triazolo[1,5-a]quinoline (4g)

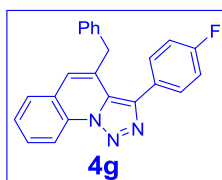

Yield: 45.6 mg (43%); Light yellow solid; Mp. 150.6-151.3  $^{\circ}\text{C}$ ;  $^1\text{H}$  NMR (600 MHz,  $\text{CDCl}_3$ )  $\delta$  8.82 (d,  $J = 8.3$  Hz, 1H), 7.77 – 7.72 (m, 2H), 7.61 – 7.55 (m, 1H), 7.43 – 7.36 (m, 2H), 7.16 (m, 4H), 7.12 – 7.06 (m, 2H), 6.82 (dd,  $J = 6.5, 2.9$  Hz, 2H), 4.02 (s, 2H);  $^{13}\text{C}$  NMR (150 MHz,  $\text{CDCl}_3$ )  $\delta$  163.15 (d,  $J = 247.9$  Hz), 140.59, 137.65, 132.43 (d,  $J = 8.3$  Hz), 131.22, 129.66, 128.75 (d,  $J = 7.8$  Hz), 128.74, 128.60, 128.23 (d,  $J = 3.2$  Hz), 128.12, 127.37, 126.71, 126.46, 124.21, 116.38, 115.31, 115.17, 38.31; IR (KBr): 2923, 2857, 1897, 1827, 1606, 1555, 1469, 1300, 1230, 1158, 1089, 996, 944, 836, 753, 705, 619, 557  $\text{cm}^{-1}$ ; HRMS (ESI) calcd for  $\text{C}_{23}\text{H}_{17}\text{FN}_3$   $[(\text{M} + \text{H})^+]$ : 354.1401, found 354.1403.

#### 4-Benzyl-3-(4-chlorophenyl)-[1,2,3]triazolo[1,5-a]quinoline (4h)

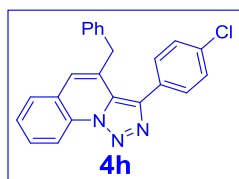

Yield: 58.8 mg (53%); Light yellow solid; Mp. 176.8-178.2 °C; <sup>1</sup>H NMR (600 MHz, CDCl<sub>3</sub>) δ 8.82 (d, *J* = 8.3 Hz, 1H), 7.77 – 7.69 (m, 2H), 7.63 – 7.51 (m, 1H), 7.36 (s, 4H), 7.17 (dd, *J* = 7.6, 5.0 Hz, 4H), 6.82 (dd, *J* = 6.5, 2.8 Hz, 2H), 4.02 (s, 2H); <sup>13</sup>C NMR (150 MHz, CDCl<sub>3</sub>) δ 140.39, 137.56, 134.74, 131.91, 131.16, 130.66, 129.69, 129.36, 128.75, 128.71, 128.61, 128.41, 128.11, 127.38, 126.72, 126.58, 124.17, 116.36, 77.37, 77.16, 76.95, 38.34; IR (KBr): 2950, 2900, 1463, 1295, 1246, 1116, 1073, 949, 852, 831, 759, 702, 514 cm<sup>-1</sup>; HRMS (ESI) calcd for C<sub>23</sub>H<sub>17</sub>ClN<sub>3</sub> [(M + H)<sup>+</sup>]: 370.1106, found 370.1105.

#### 4-Benzyl-3-(4-bromophenyl)-[1,2,3]triazolo[1,5-a]quinoline (4i)

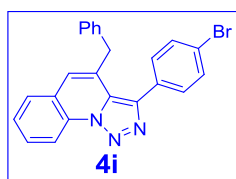

Yield: 58.4 mg (47%); Light yellow solid; Mp. 178.8-179.9 °C; <sup>1</sup>H NMR (600 MHz, CDCl<sub>3</sub>) δ 8.81 (d, *J* = 8.2 Hz, 1H), 7.77 – 7.69 (m, 2H), 7.61 – 7.55 (m, 1H), 7.54 – 7.48 (m, 2H), 7.32 – 7.27 (m, 2H), 7.21 – 7.13 (m, 4H), 6.82 (dd, *J* = 6.5, 2.9 Hz, 2H), 4.02 (s, 2H); <sup>13</sup>C NMR (150 MHz, CDCl<sub>3</sub>) δ 140.38, 137.52, 132.18, 131.34, 131.13, 131.11, 129.68, 129.32, 128.74, 128.68, 128.60, 128.10, 127.37, 126.71, 126.59, 124.15, 122.96, 116.33, 77.37, 77.16, 76.95, 38.34; IR (KBr): 2915, 1458, 1250, 1161, 1068, 994, 947, 824, 757, 696, 573, 507 cm<sup>-1</sup>; HRMS (ESI) calcd for C<sub>23</sub>H<sub>17</sub>BrN<sub>3</sub> [(M + H)<sup>+</sup>]: 414.0600, found 414.0602.

#### 4-Benzyl-3-(pyridin-2-yl)-[1,2,3]triazolo[1,5-a]quinoline (4j)

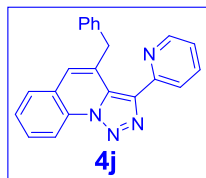

Yield: 66.6 mg (66%); Light yellow solid; Mp. 162.0-163.0 °C; <sup>1</sup>H NMR (600 MHz, CDCl<sub>3</sub>) δ 8.82 (d, *J* = 8.3 Hz, 1H), 8.73 (d, *J* = 4.8 Hz, 1H), 7.88 (d, *J* = 7.5 Hz, 1H), 7.78 – 7.68 (m, 3H), 7.57 (t, *J* = 7.6 Hz, 1H), 7.33 – 7.28 (m, 1H), 7.22 (s, 1H), 7.14 (dd, *J* = 9.6, 5.7 Hz, 3H), 6.97 – 6.75 (m, 2H), 4.56 (s, 2H); <sup>13</sup>C NMR (150 MHz, CDCl<sub>3</sub>) δ 151.83, 148.82, 141.27, 138.54, 136.67, 130.92, 130.27, 130.03, 129.53, 128.91, 128.44, 128.02, 127.32, 126.79, 126.38, 125.00, 124.30, 122.77, 116.37, 77.37, 77.16, 76.95, 39.00; IR (KBr): 2975, 1797, 1451, 1300, 1090, 1048, 749 cm<sup>-1</sup>; HRMS (ESI) calcd for C<sub>22</sub>H<sub>17</sub>N<sub>4</sub> [(M + H)<sup>+</sup>]: 337.1448, found 337.1450.

#### 4-(2-Methoxybenzyl)-3-(thiophen-2-yl)-[1,2,3]triazolo[1,5-a]quinoline (4k)

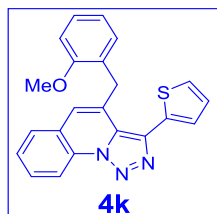

Yield: 72.5 mg (65%); Light yellow solid; Mp. 160.9-162.4 °C; <sup>1</sup>H NMR (600 MHz, CDCl<sub>3</sub>) δ 8.80 (d, *J* = 8.3 Hz, 1H), 7.73 – 7.63 (m, 2H), 7.57 – 7.49 (m, 1H), 7.44 – 7.38 (m, 1H), 7.26 – 7.23 (m, 1H), 7.19 (dd, *J* = 3.5, 0.9 Hz, 1H), 7.06 (dd, *J* = 5.1, 3.6 Hz, 1H), 6.99 (s, 1H), 6.93 (dd, *J* = 7.3, 1.3 Hz, 1H), 6.86 (dd, *J* = 14.0, 7.6 Hz, 2H), 4.11 (s, 2H), 3.72 (s, 3H); <sup>13</sup>C NMR (150 MHz, CDCl<sub>3</sub>) δ 157.44, 134.60, 132.58, 131.05, 130.47, 130.14, 129.54, 129.37, 129.15, 128.34, 128.02, 127.36, 127.23, 126.99, 126.26, 125.61, 124.38, 120.63, 116.28, 110.37, 77.37, 77.16, 76.95, 55.32, 32.47; IR (KBr): 2919, 1458, 1301, 1242, 1164, 1111, 1033, 941, 845, 756, 719, 559 cm<sup>-1</sup>; HRMS (ESI) calcd for C<sub>22</sub>H<sub>18</sub>N<sub>3</sub>OS [(M + H)<sup>+</sup>]:

372.1165, found 372.1163.

#### 4-Benzyl-3-cyclopropyl-[1,2,3]triazolo[1,5-a]quinoline (4l)

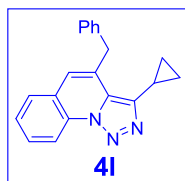

Yield: 53.9 mg (60%); Light yellow solid; Mp. 141.7-142.6 °C; <sup>1</sup>H NMR (600 MHz, CDCl<sub>3</sub>) δ 8.72 (d, *J* = 8.3 Hz, 1H), 7.67 (dd, *J* = 15.4, 8.0 Hz, 2H), 7.52 (t, *J* = 7.6 Hz, 1H), 7.35 (t, *J* = 7.5 Hz, 2H), 7.28 (t, *J* = 7.3 Hz, 1H), 7.23 (d, *J* = 7.5 Hz, 2H), 7.01 (s, 1H), 4.50 (s, 2H), 2.19 – 1.91 (m, 1H), 1.15 (dd, *J* = 5.0, 1.7 Hz, 2H), 0.95 (dd, *J* = 8.3, 2.2 Hz, 2H); <sup>13</sup>C NMR (150 MHz, CDCl<sub>3</sub>) δ 142.12, 138.19, 131.34, 130.54, 129.30, 129.21, 128.99, 128.94, 127.97, 127.84, 127.03, 126.95, 124.80, 124.32, 116.22, 77.37, 77.16, 76.95, 38.28, 7.85, 7.75; IR (KBr): 2907, 2848, 1559, 1488, 1451, 1334, 1249, 1202, 1023, 991, 951, 900, 812, 759, 729, 559, 515 cm<sup>-1</sup>; HRMS (ESI) calcd for C<sub>20</sub>H<sub>18</sub>N<sub>3</sub> [(M + H)<sup>+</sup>]: 300.1495, found 300.1495.

#### 4-Benzyl-7-methyl-3-(*p*-tolyl)-[1,2,3]triazolo[1,5-a]quinoline (4n)

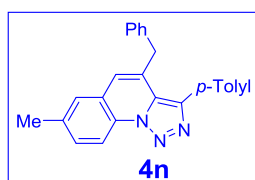

Yield: 58.9 mg (54%); Light yellow solid; Mp. 170.6-171.5 °C; <sup>1</sup>H NMR (600 MHz, CDCl<sub>3</sub>) δ 8.69 (d, *J* = 8.5 Hz, 1H), 7.52 (dd, *J* = 8.5, 1.4 Hz, 1H), 7.49 (s, 1H), 7.38 (d, *J* = 8.0 Hz, 2H), 7.22 (d, *J* = 7.8 Hz, 2H), 7.20 – 7.15 (m, 3H), 6.99 (s, 1H), 6.88 (dd, *J* = 7.1, 2.3 Hz, 2H), 4.01 (s, 2H), 2.51 (s, 3H), 2.43 (s, 3H); <sup>13</sup>C NMR (150 MHz, CDCl<sub>3</sub>) δ 141.58, 138.35, 137.96, 137.11, 130.82, 130.58, 129.43, 129.31, 129.30, 129.11, 129.09, 128.92, 128.54, 127.66, 126.63, 125.65, 124.30, 116.13, 77.37, 77.16, 76.95, 38.19, 21.51, 21.47; IR (KBr): 2964, 2920, 2855, 1910, 1806, 1731, 1540, 1448, 1261, 1200, 1086, 1042, 998, 958, 897, 818, 736, 699, 561, 520 cm<sup>-1</sup>; HRMS (ESI) calcd for C<sub>25</sub>H<sub>22</sub>N<sub>3</sub> [(M + H)<sup>+</sup>]: 364.1808, found 364.1810.

#### 4-Benzyl-7-chloro-3-(*p*-tolyl)-[1,2,3]triazolo[1,5-a]quinoline (4o)

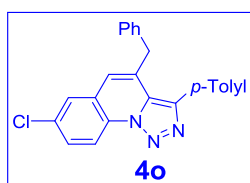

Yield: 50.6 mg (44%); Light yellow solid; Mp. 143.9-145.0 °C; <sup>1</sup>H NMR (600 MHz, CDCl<sub>3</sub>) δ 8.74 (d, *J* = 8.8 Hz, 1H), 7.68 (d, *J* = 2.1 Hz, 1H), 7.64 (dd, *J* = 8.8, 2.2 Hz, 1H), 7.39 (d, *J* = 8.0 Hz, 2H), 7.24 (d, *J* = 7.8 Hz, 2H), 7.22 – 7.19 (m, 3H), 6.94 (s, 1H), 6.89 (dd, *J* = 6.9, 2.4 Hz, 2H), 4.01 (s, 2H), 2.43 (s, 3H); <sup>13</sup>C NMR (150 MHz, CDCl<sub>3</sub>) δ 142.05, 138.63, 137.40, 132.84, 131.30, 130.54, 129.66, 129.54, 129.14, 129.10, 129.01, 128.88, 128.66, 127.19, 126.84, 125.42, 124.50, 117.84, 77.37, 77.16, 76.95, 38.19, 21.51; IR (KBr): 2968, 2919, 2856, 1913, 1551, 1464, 1422, 1330, 1245, 1195, 1154, 1083, 1045, 990, 895, 821, 761, 737, 700, 551, 506 cm<sup>-1</sup>; HRMS (ESI) calcd for C<sub>24</sub>H<sub>19</sub>ClN<sub>3</sub> [(M + H)<sup>+</sup>]: 384.1262, found 384.1260.

## 6. X-ray Data of 3a

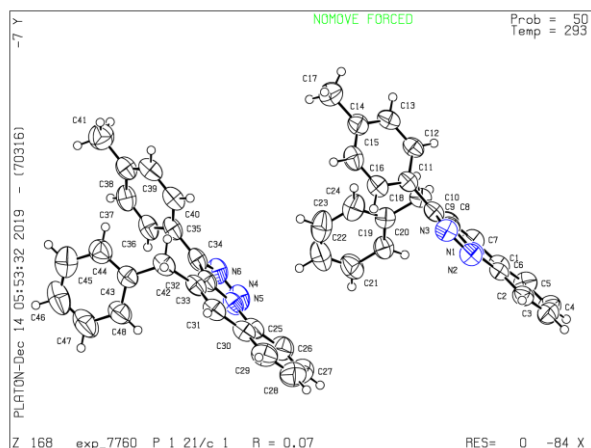

Datablock: exp\_7760

|                        |                                                |                                                |                         |
|------------------------|------------------------------------------------|------------------------------------------------|-------------------------|
| Bond precision:        | C-C = 0.0037 Å                                 | Wavelength=0.71073                             |                         |
| Cell:                  | a=18.4957(13)<br>alpha=90                      | b=7.8032(5)<br>beta=92.571(7)                  | c=25.760(2)<br>gamma=90 |
| Temperature:           | 293 K                                          |                                                |                         |
|                        | Calculated                                     | Reported                                       |                         |
| Volume                 | 3714.1(5)                                      | 3714.0(5)                                      |                         |
| Space group            | P 21/c                                         | P 1 21/c 1                                     |                         |
| Hall group             | -P 2ybc                                        | -P 2ybc                                        |                         |
| Moiety formula         | C <sub>24</sub> H <sub>19</sub> N <sub>3</sub> | C <sub>24</sub> H <sub>19</sub> N <sub>3</sub> |                         |
| Sum formula            | C <sub>24</sub> H <sub>19</sub> N <sub>3</sub> | C <sub>24</sub> H <sub>19</sub> N <sub>3</sub> |                         |
| Mr                     | 349.42                                         | 349.42                                         |                         |
| Dx, g cm <sup>-3</sup> | 1.250                                          | 1.250                                          |                         |
| Z                      | 8                                              | 8                                              |                         |
| Mu (mm <sup>-1</sup> ) | 0.075                                          | 0.075                                          |                         |
| F000                   | 1472.0                                         | 1472.0                                         |                         |
| F000'                  | 1472.49                                        |                                                |                         |
| h,k,lmax               | 23,9,32                                        | 23,9,32                                        |                         |
| Nref                   | 8104                                           | 7966                                           |                         |
| Tmin,Tmax              | 0.981,0.992                                    | 0.518,1.000                                    |                         |
| Tmin'                  | 0.978                                          |                                                |                         |
| Correction method=     | # Reported T Limits: Tmin=0.518 Tmax=1.000     |                                                |                         |
| AbsCorr =              | MULTI-SCAN                                     |                                                |                         |
| Data completeness =    | 0.983                                          | Theta (max) = 27.000                           |                         |
| R (reflections) =      | 0.0668( 3860)                                  | wR2 (reflections) = 0.1772( 7966)              |                         |
| S =                    | 1.006                                          | Npar = 489                                     |                         |



## 7. $^1\text{H}$ and $^{13}\text{C}$ NMR Spectra of the Compounds

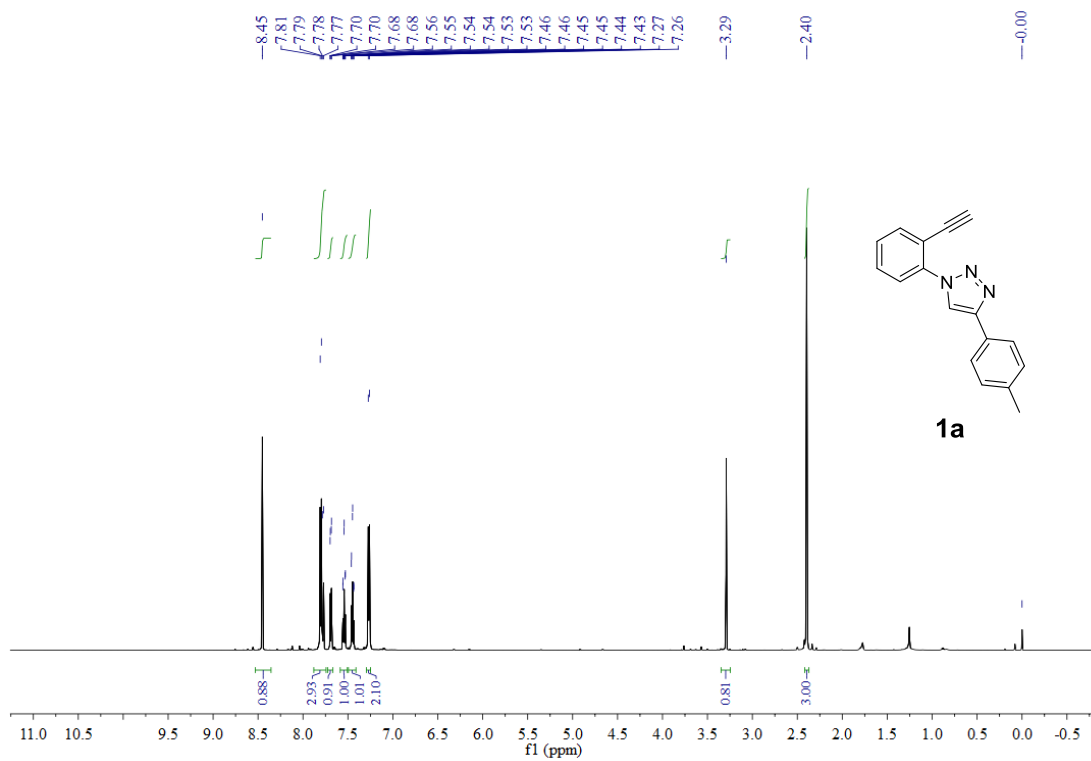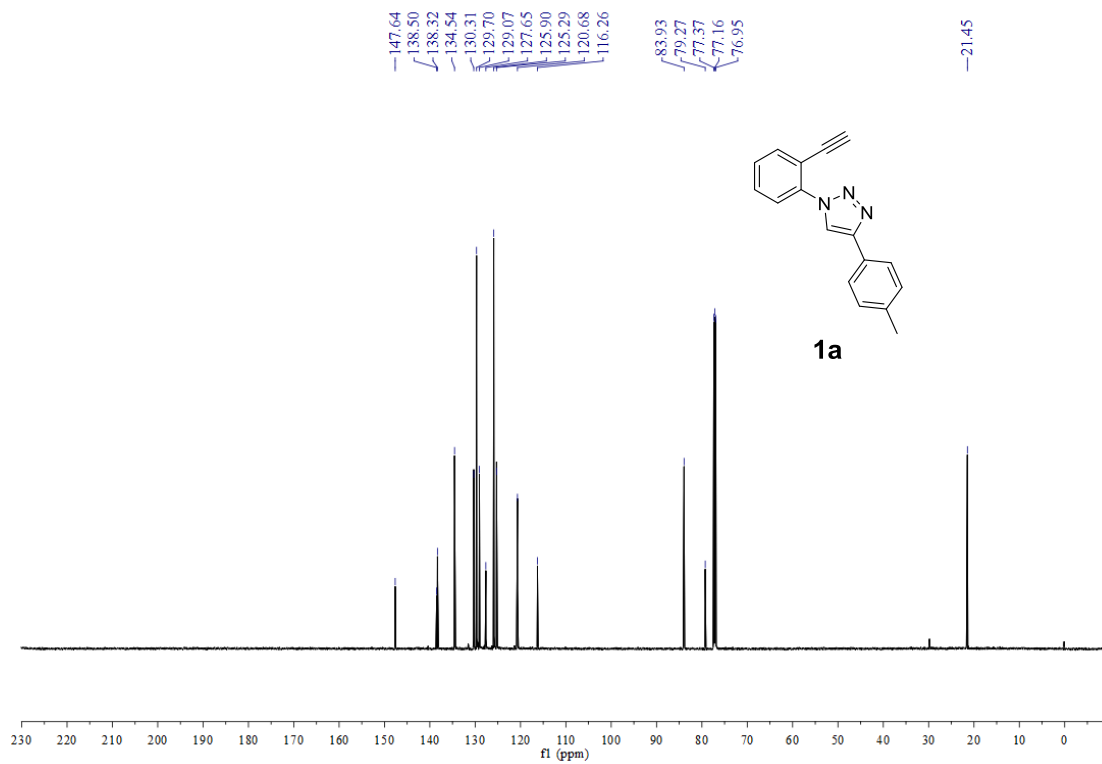

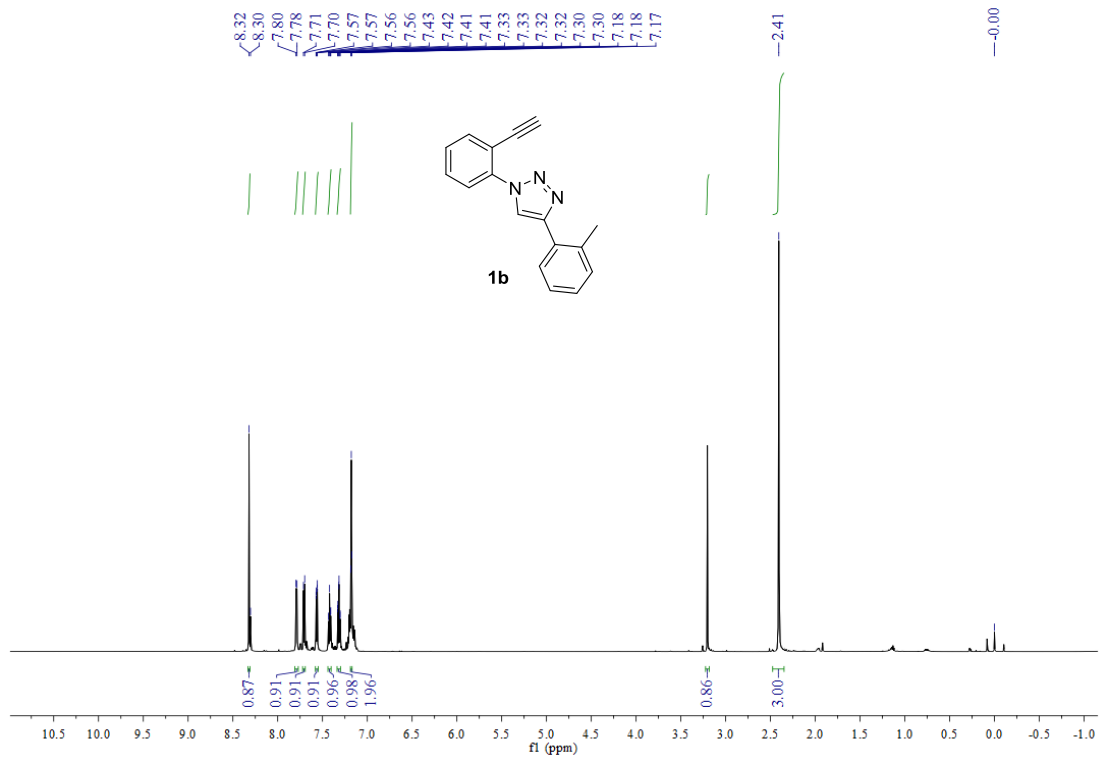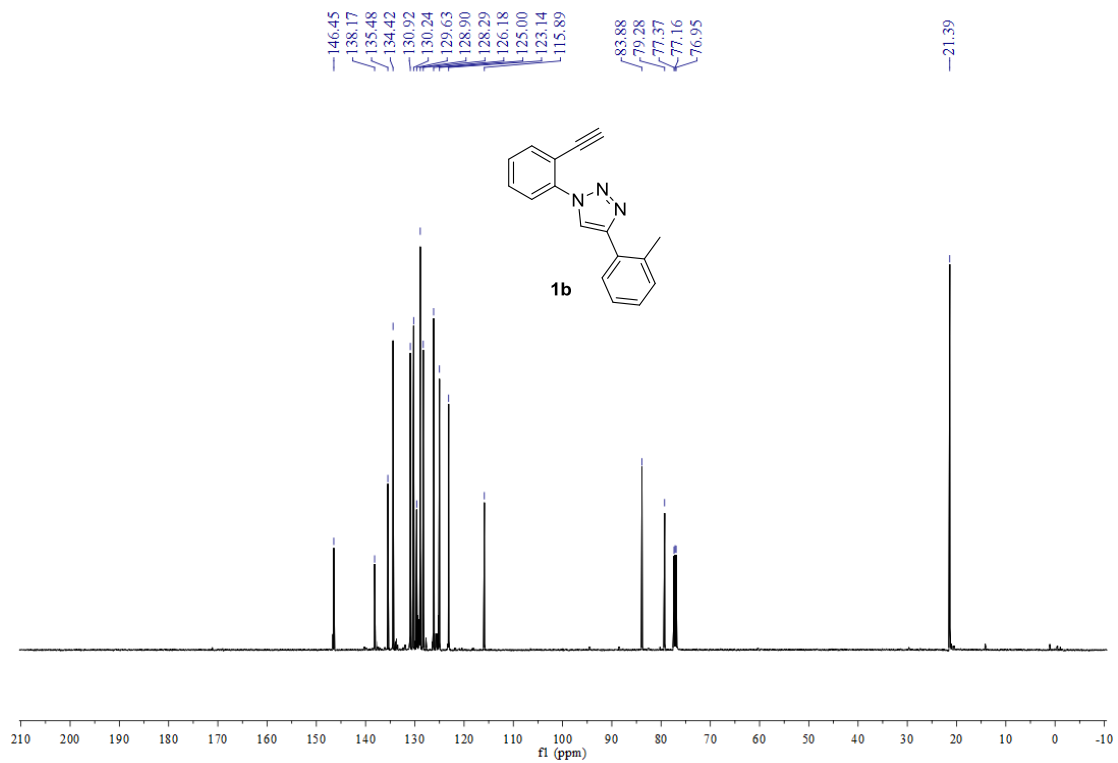

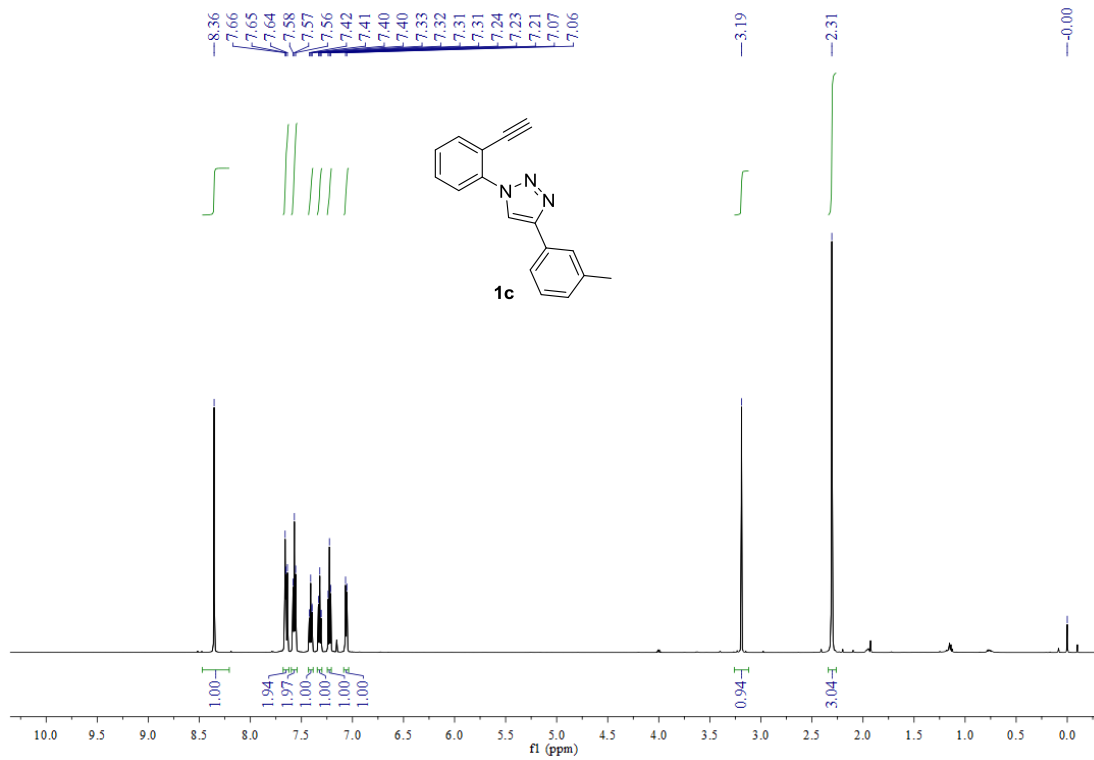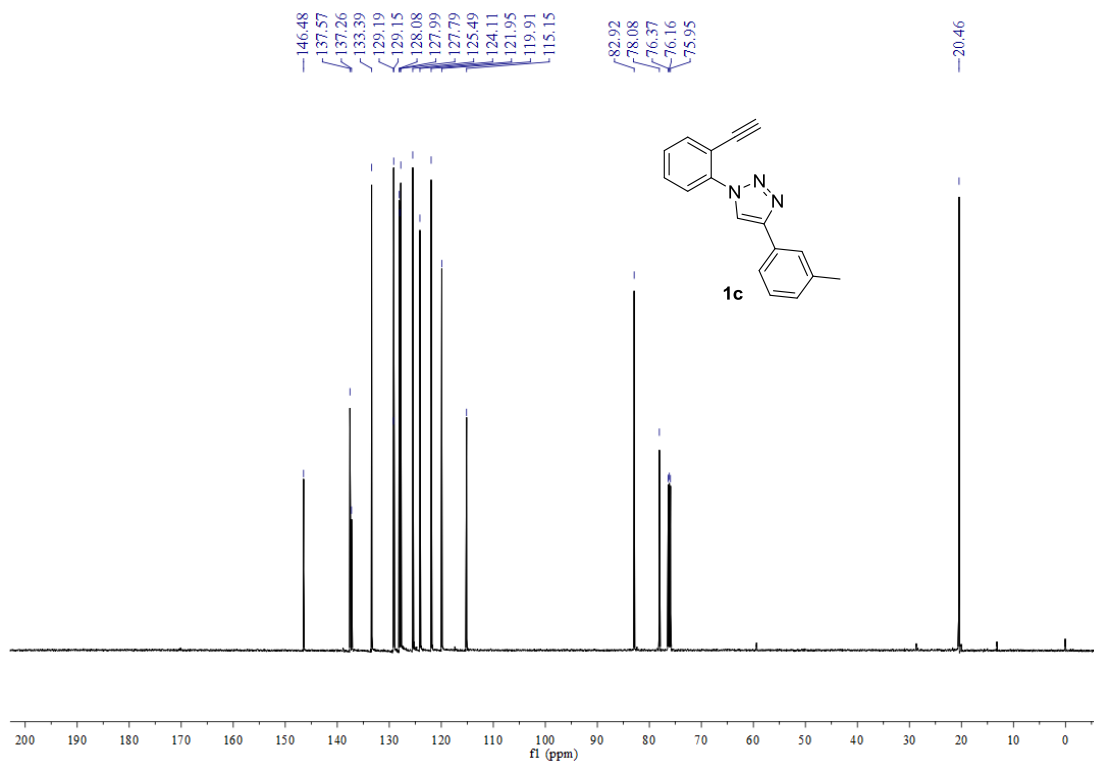

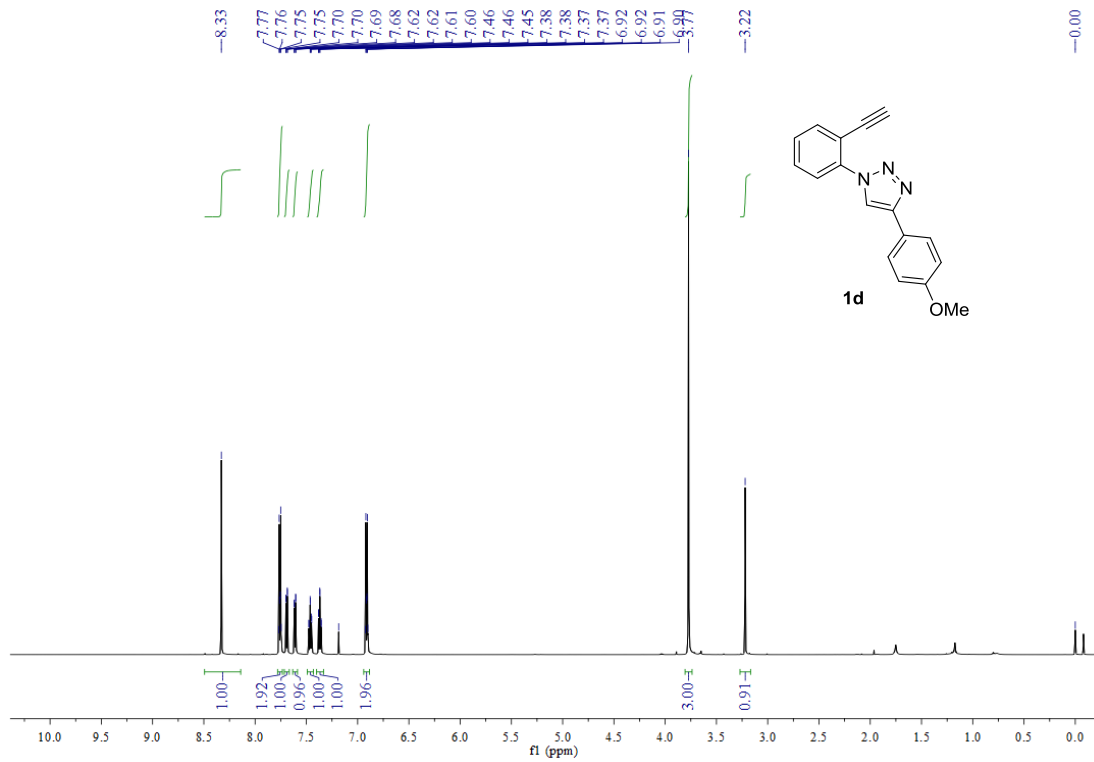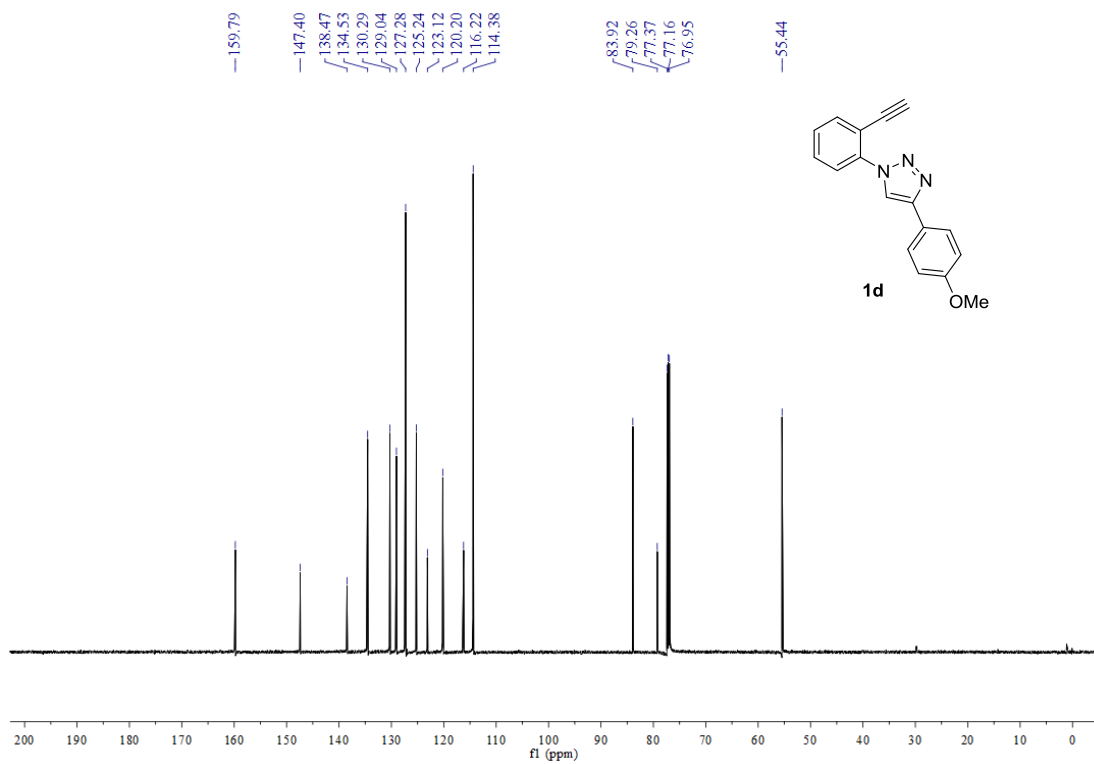

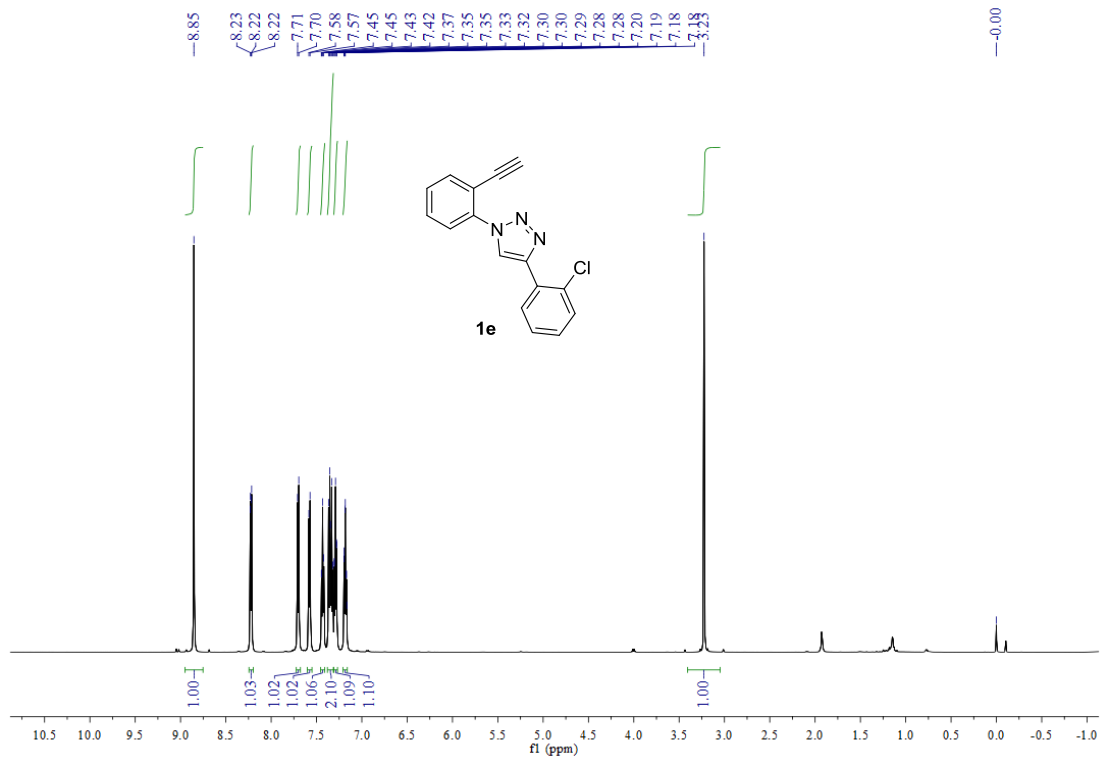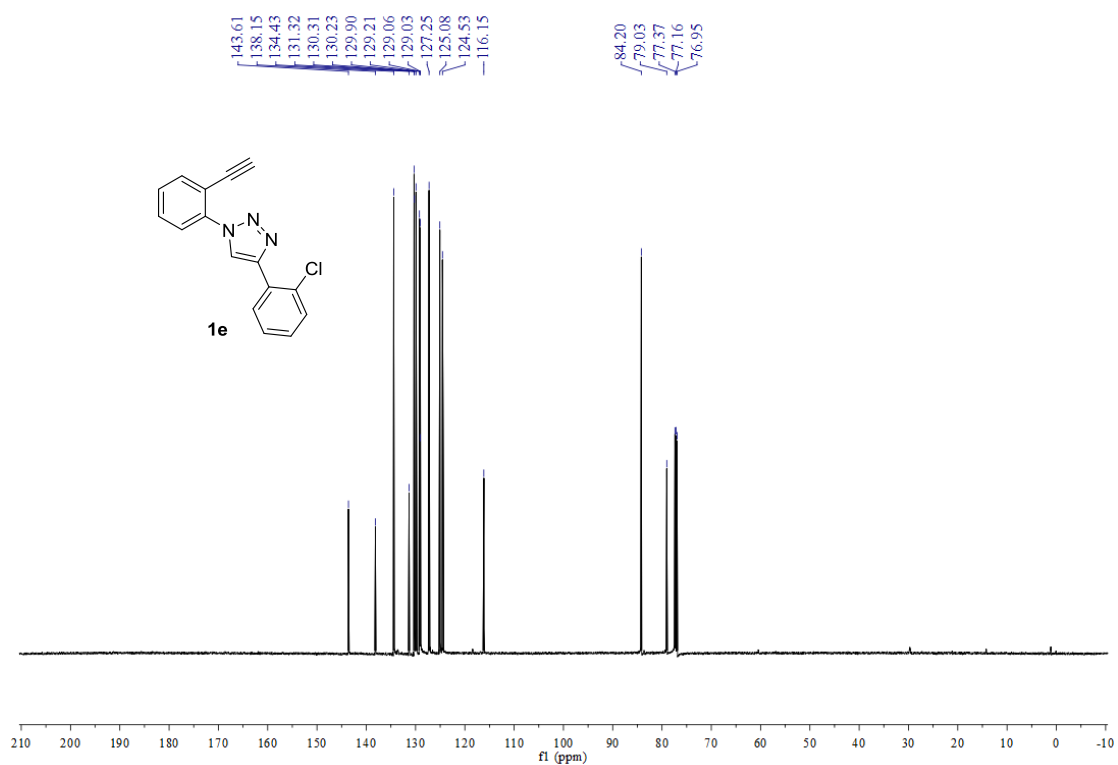

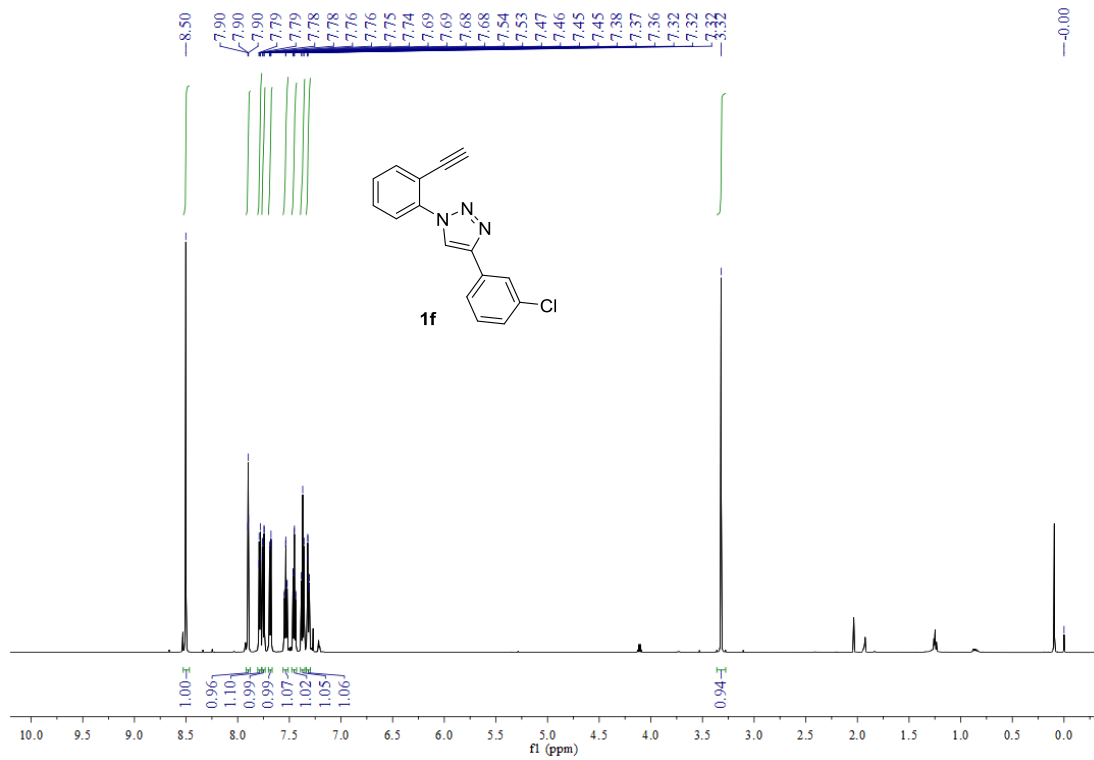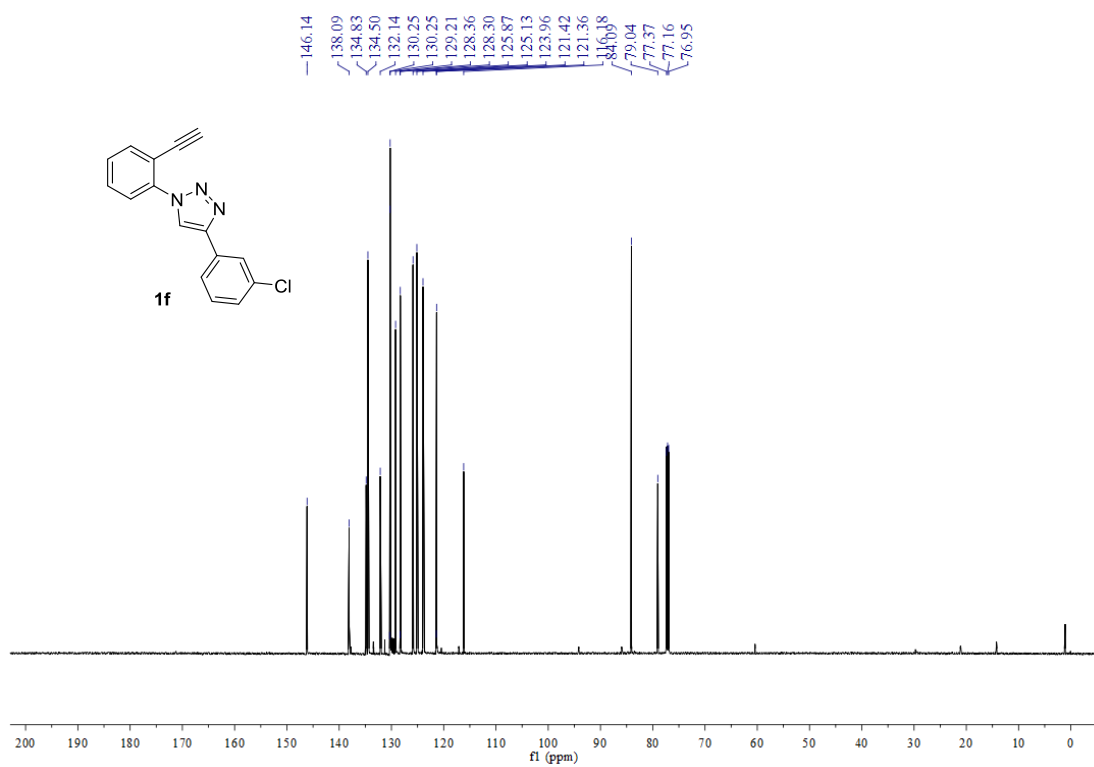

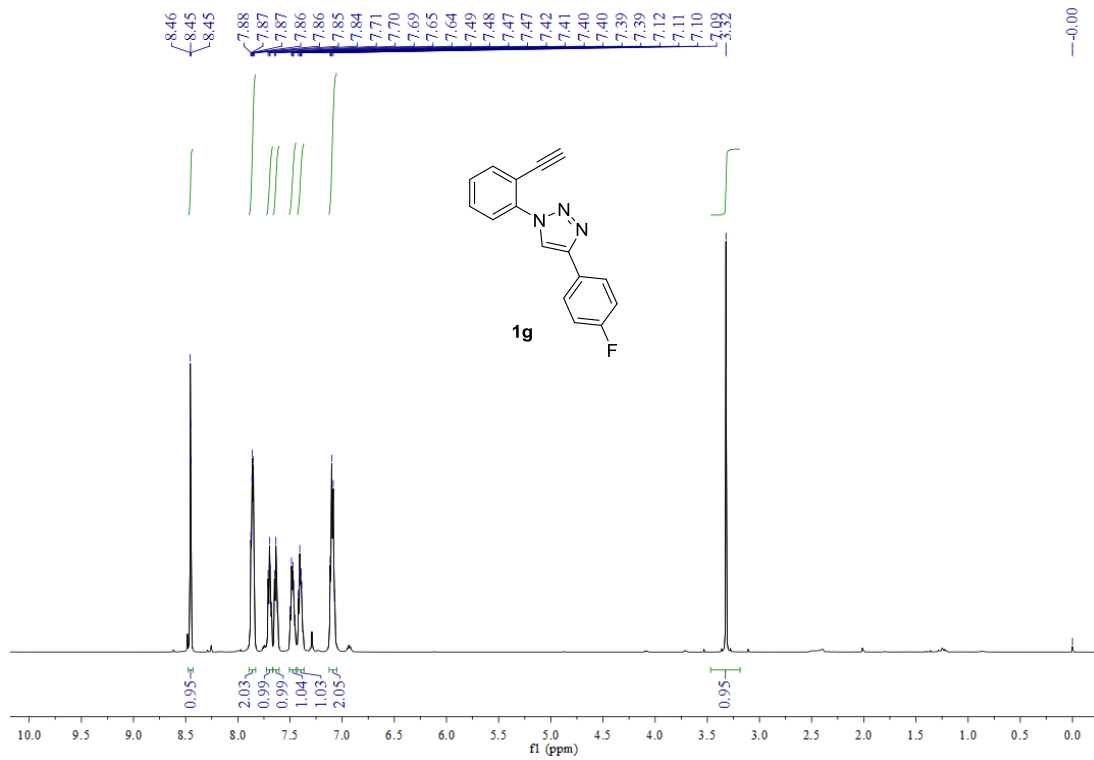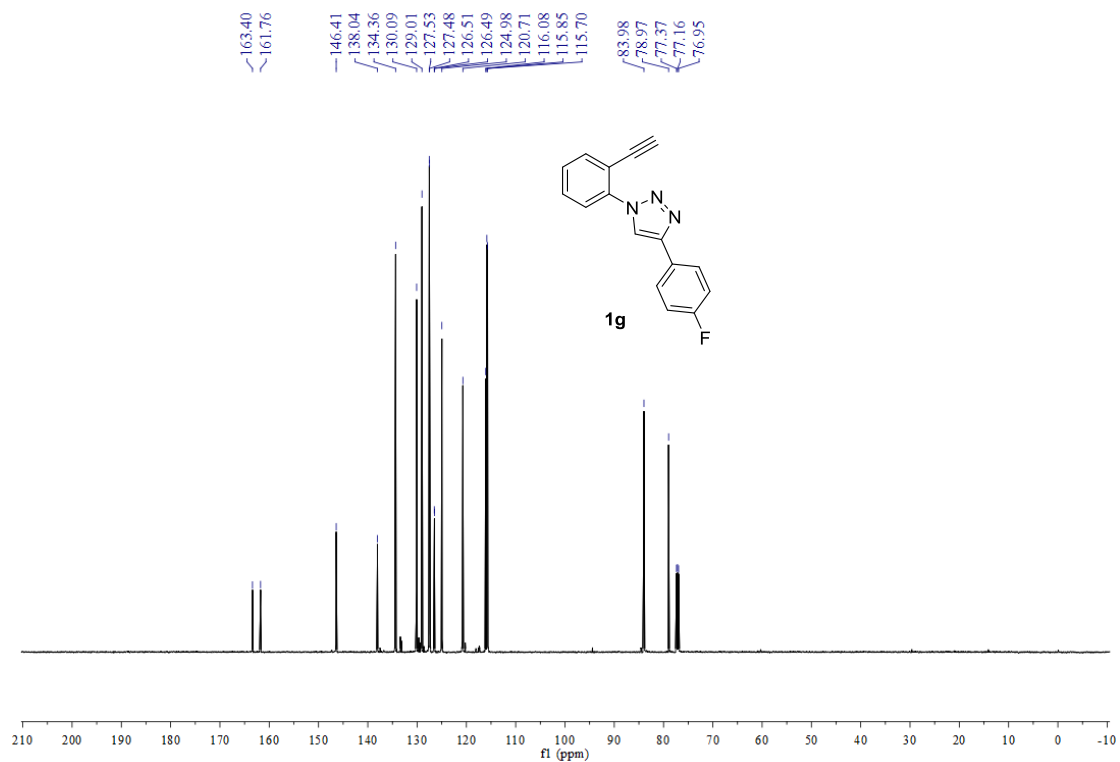

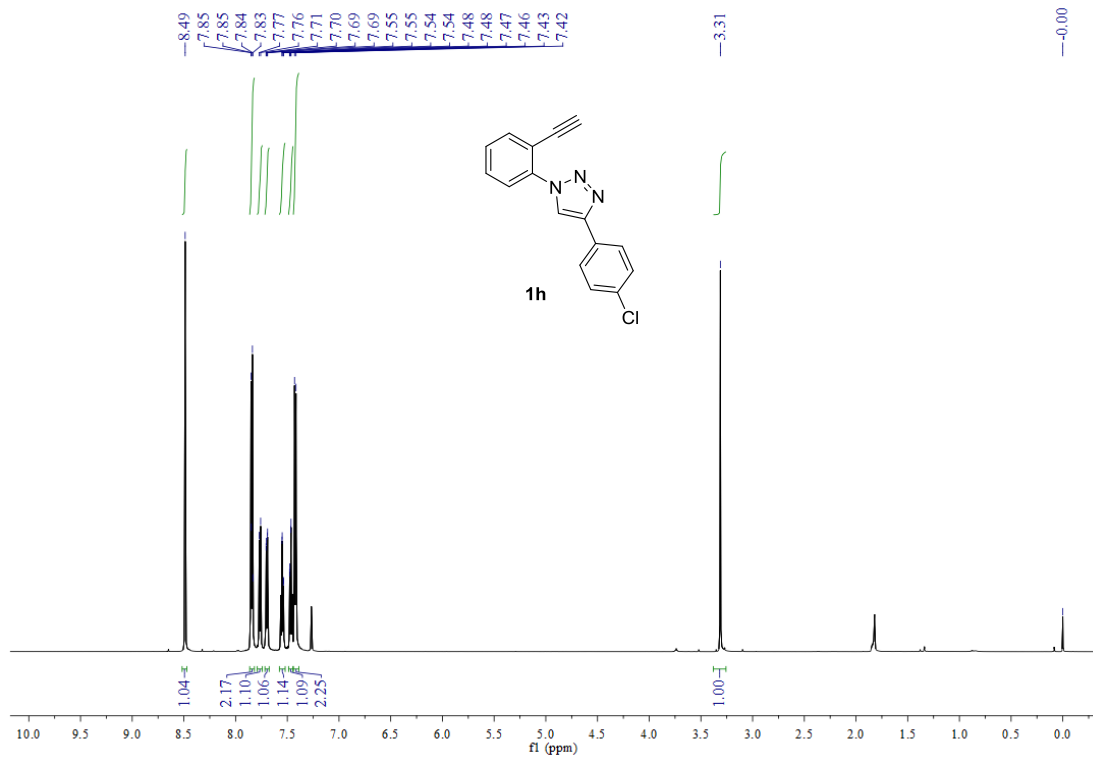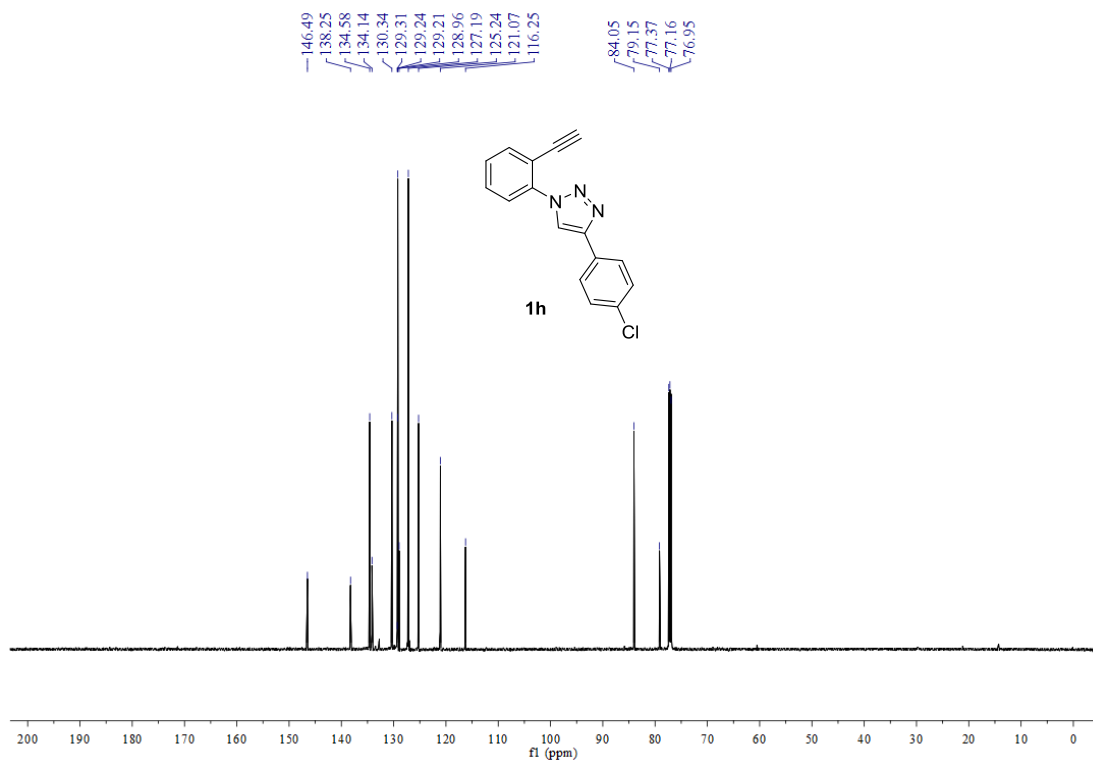



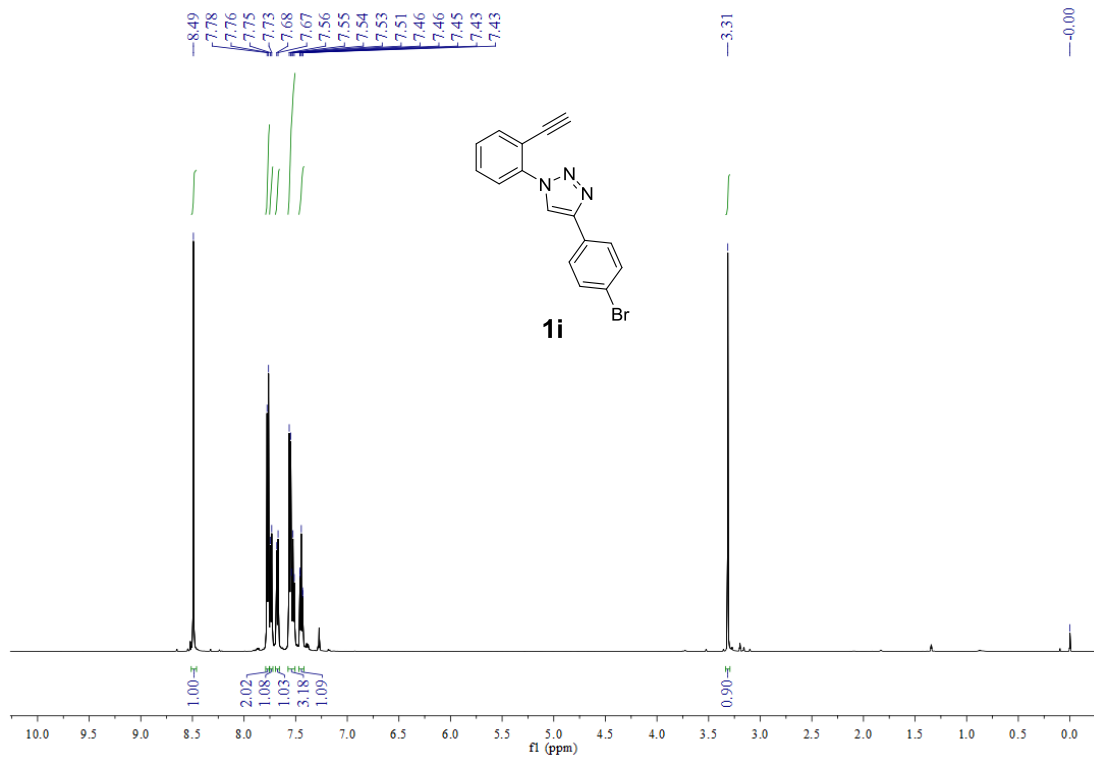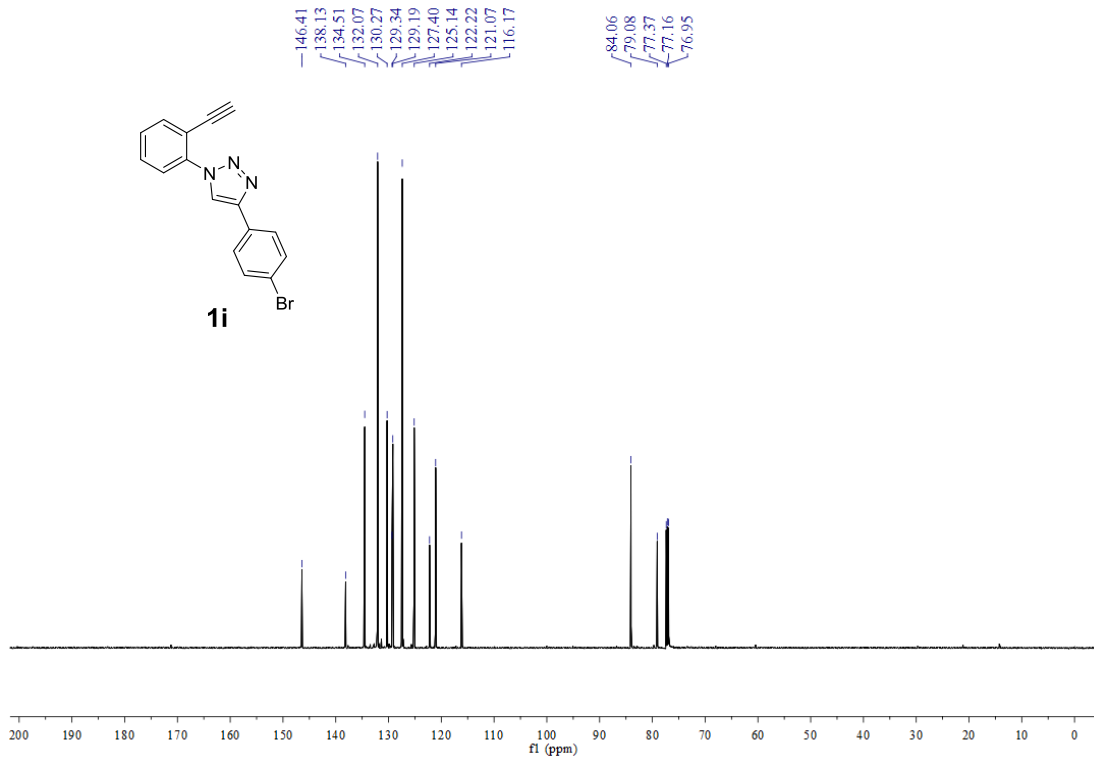

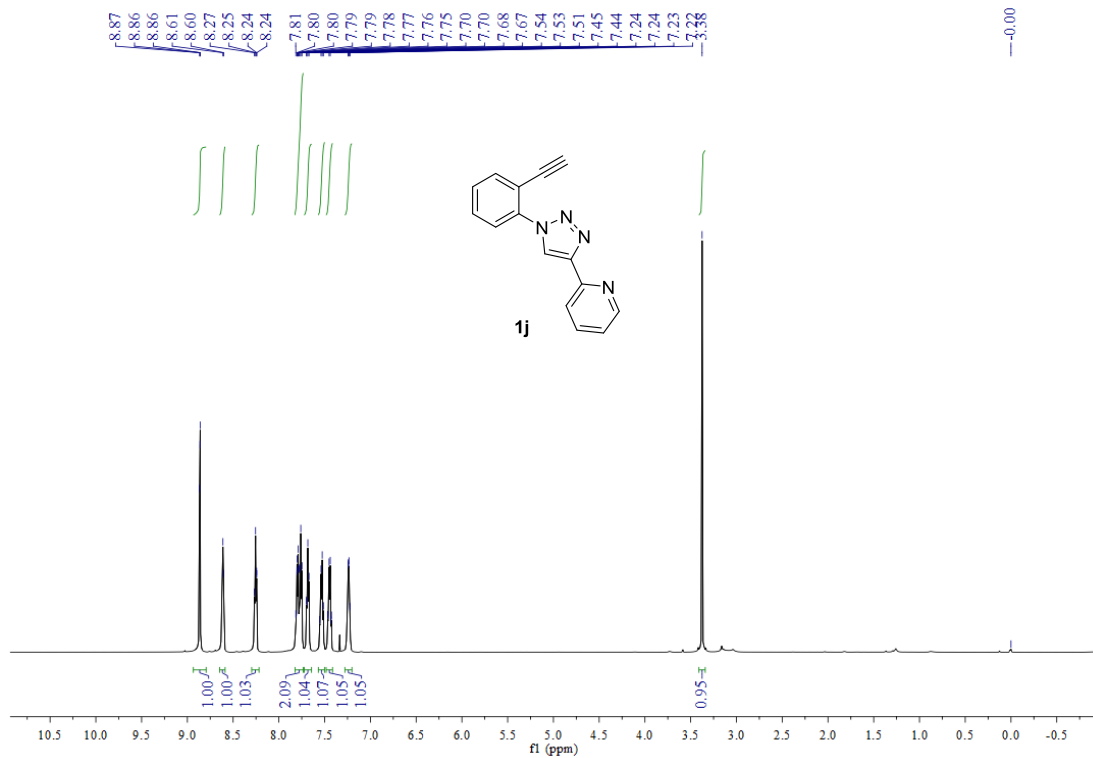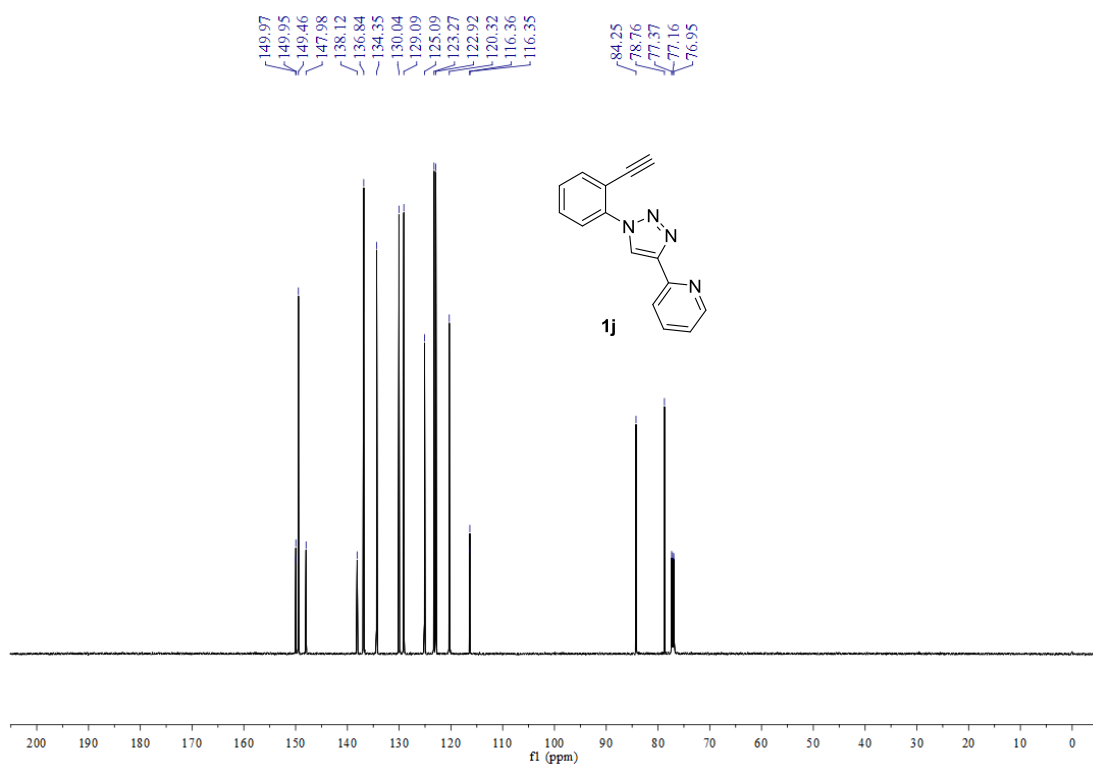

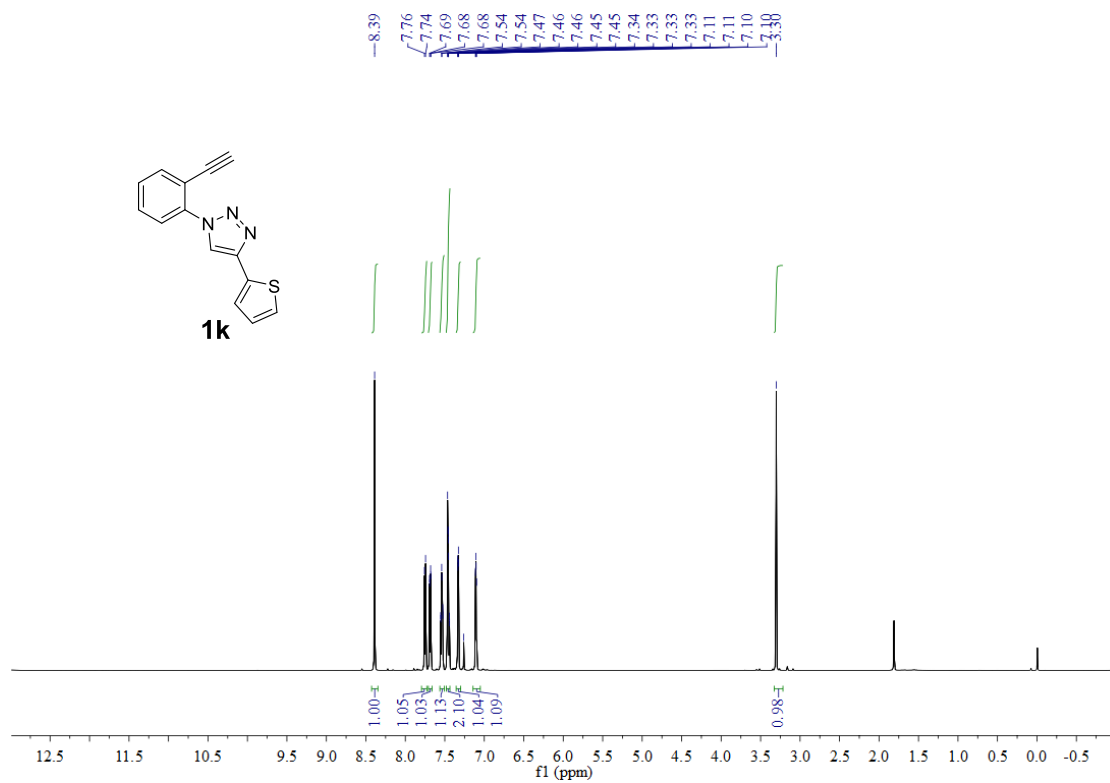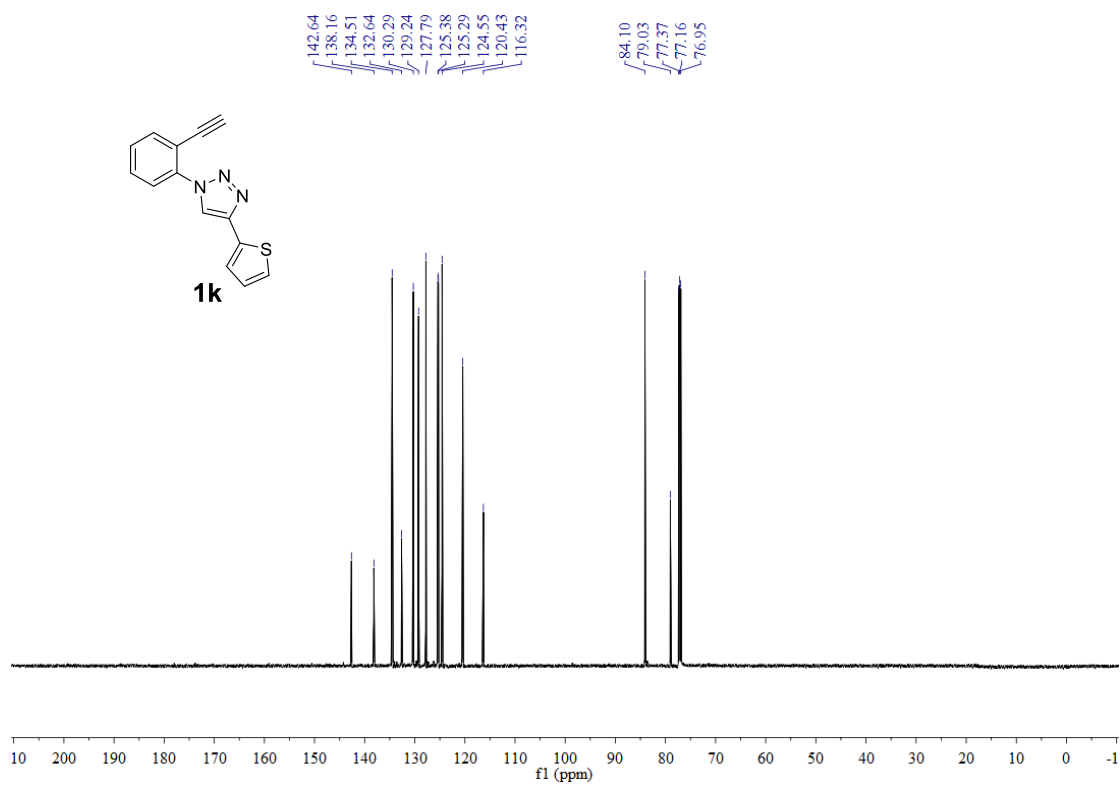

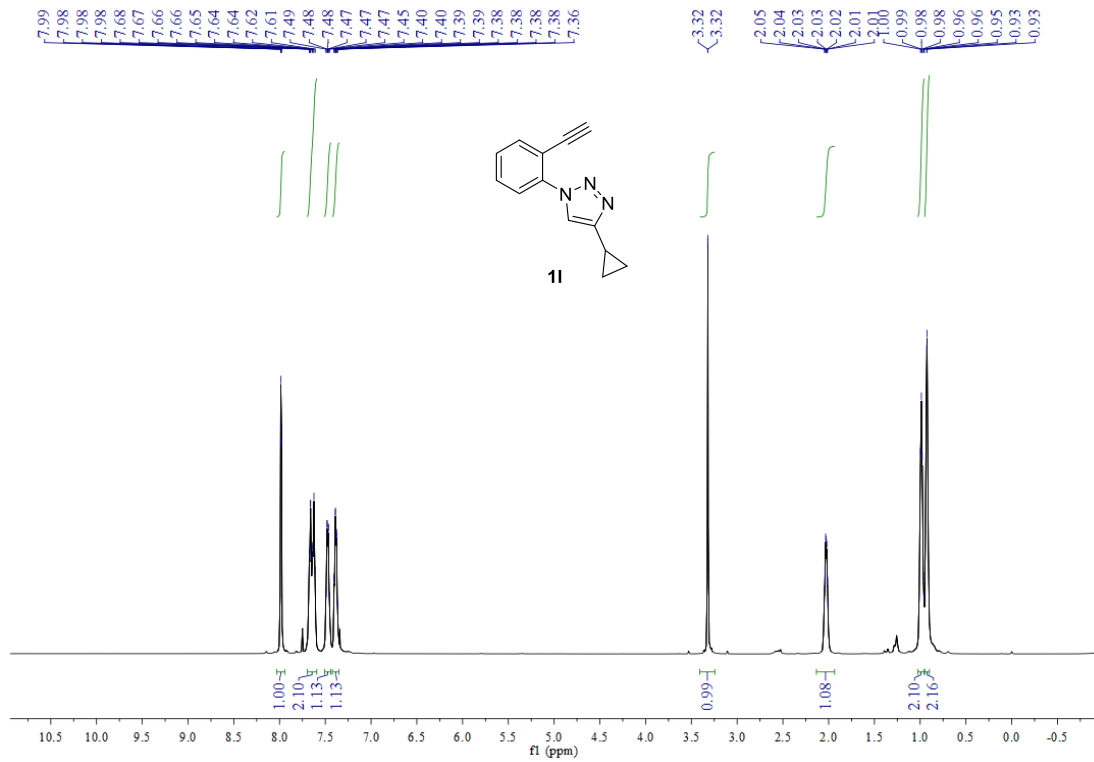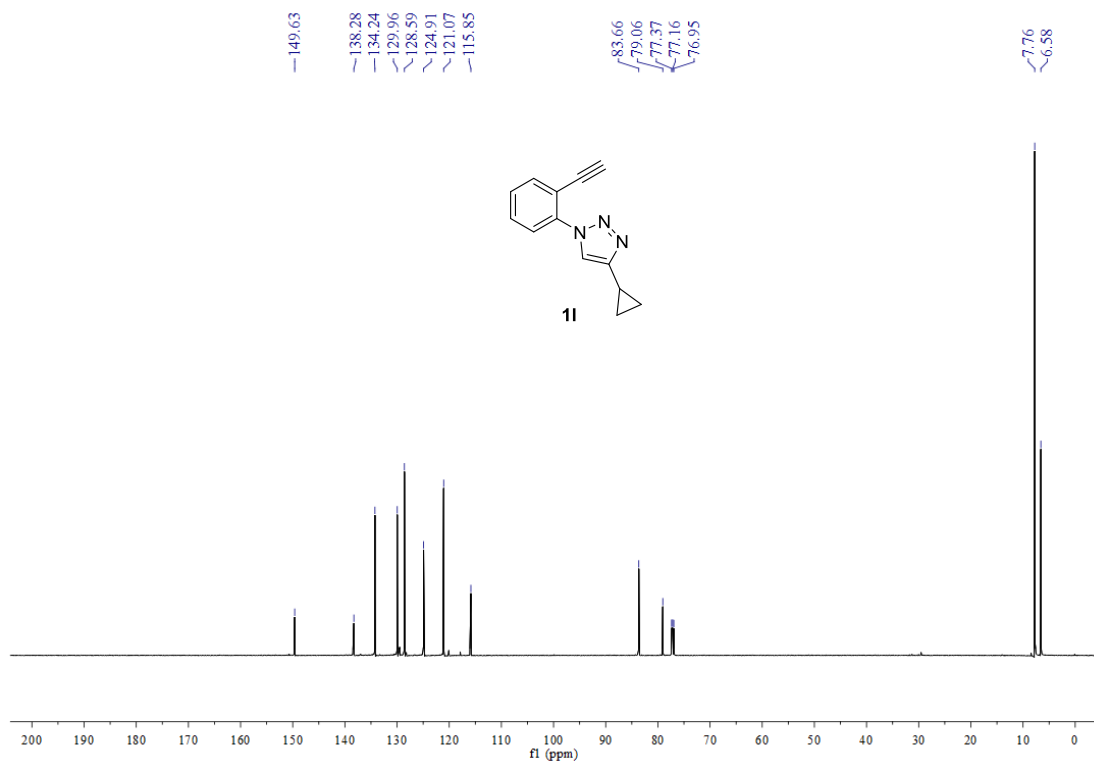

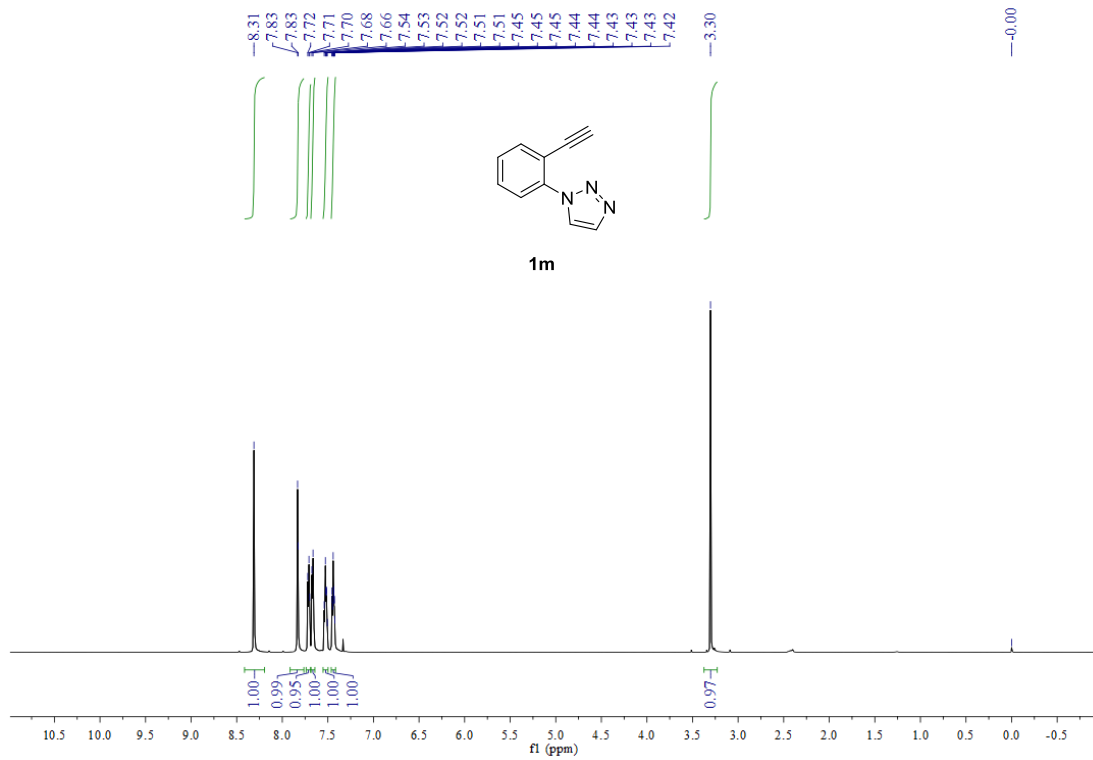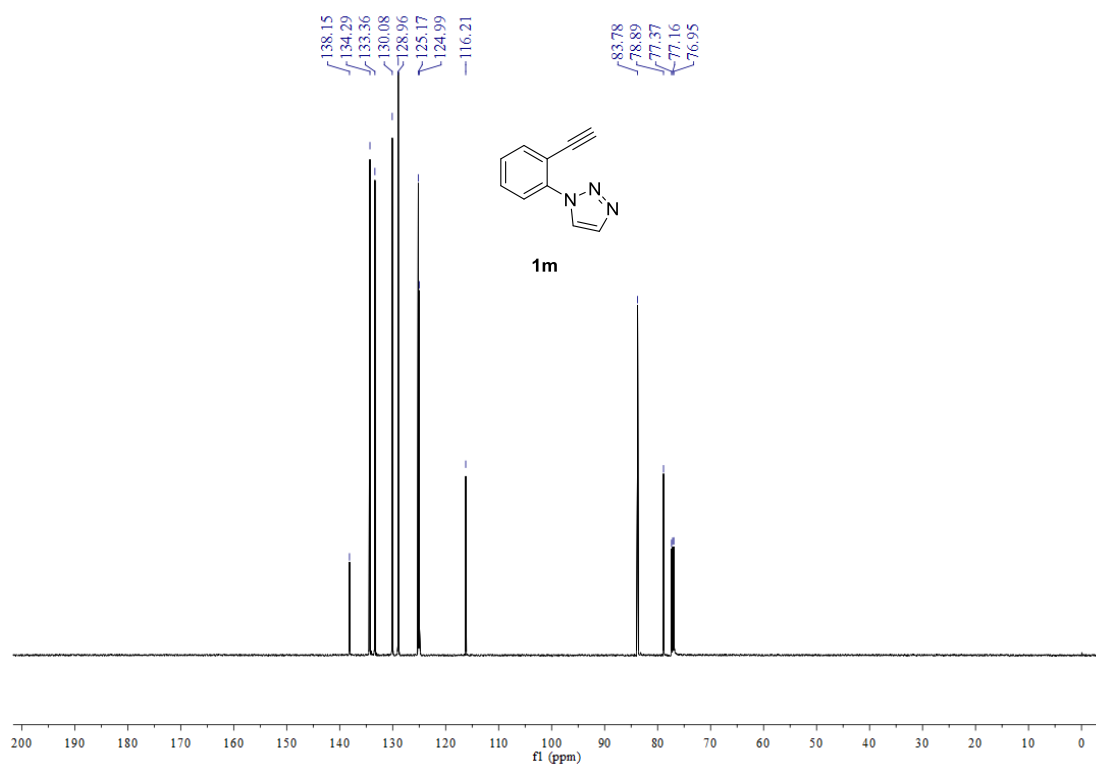

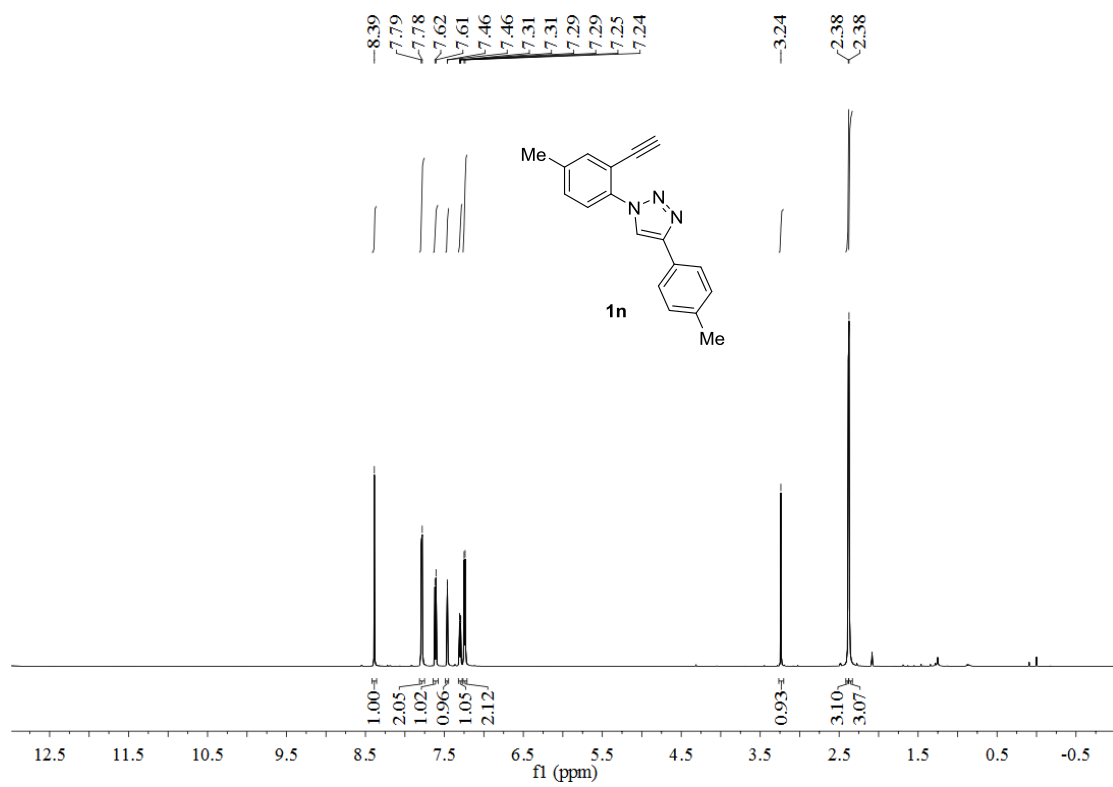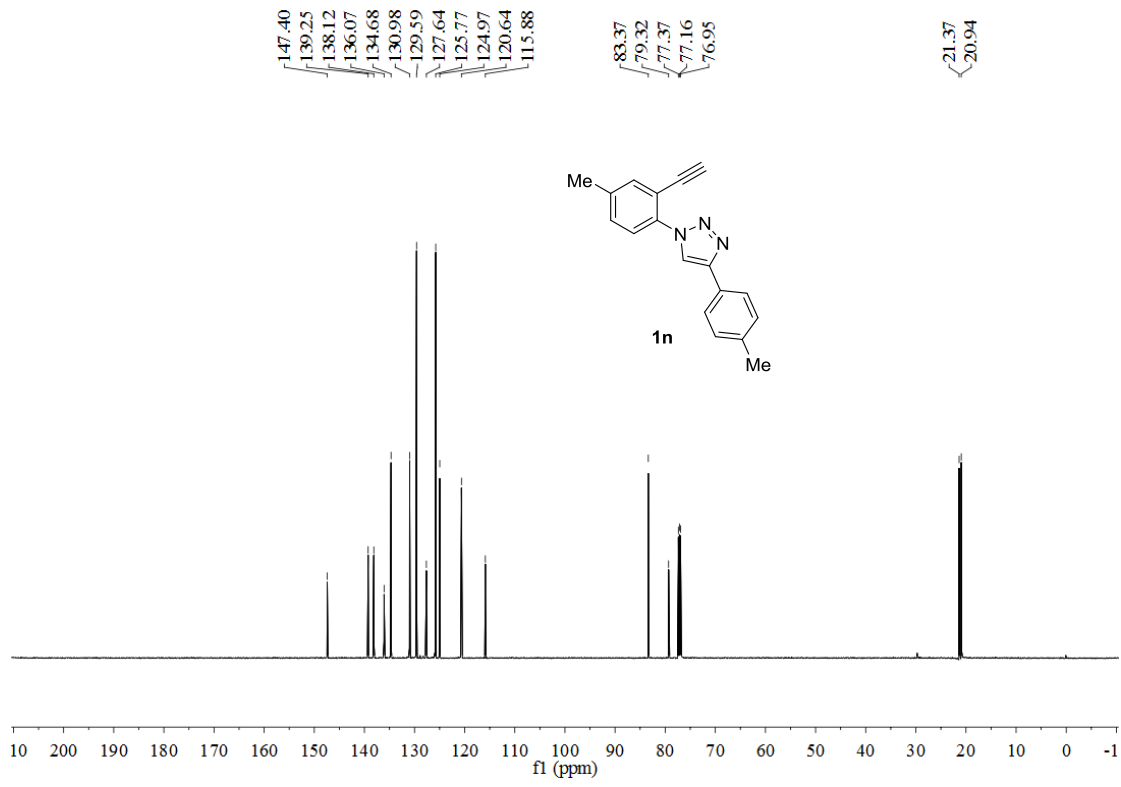

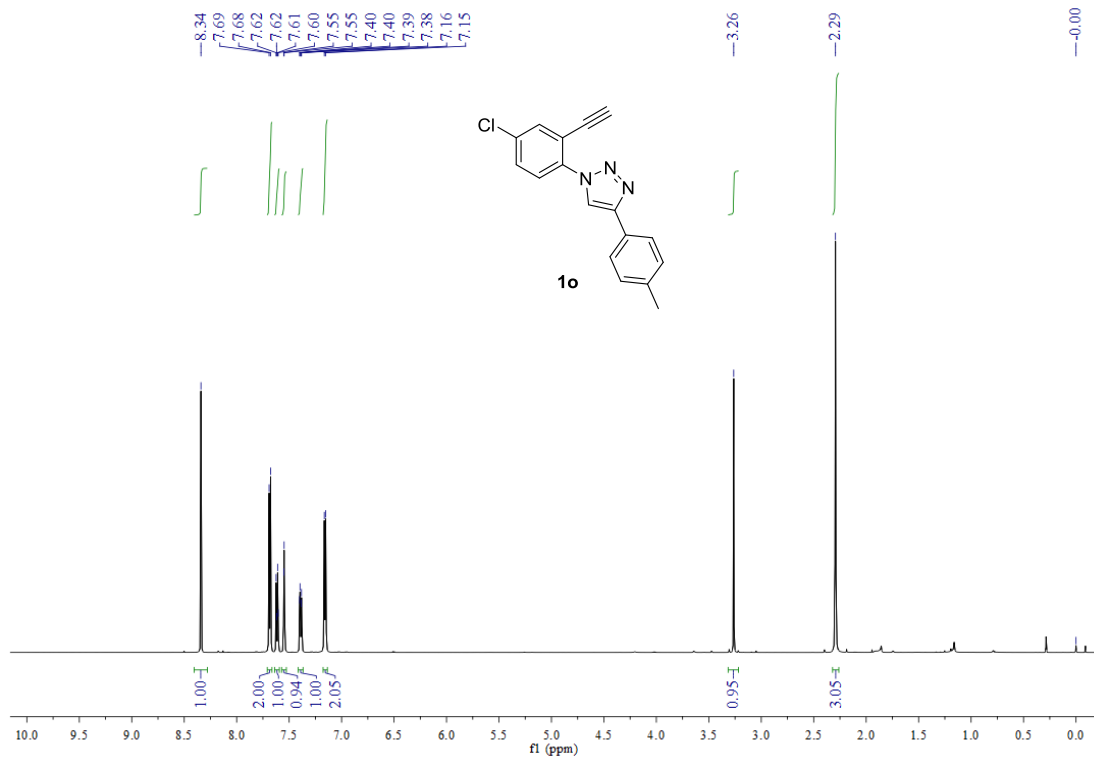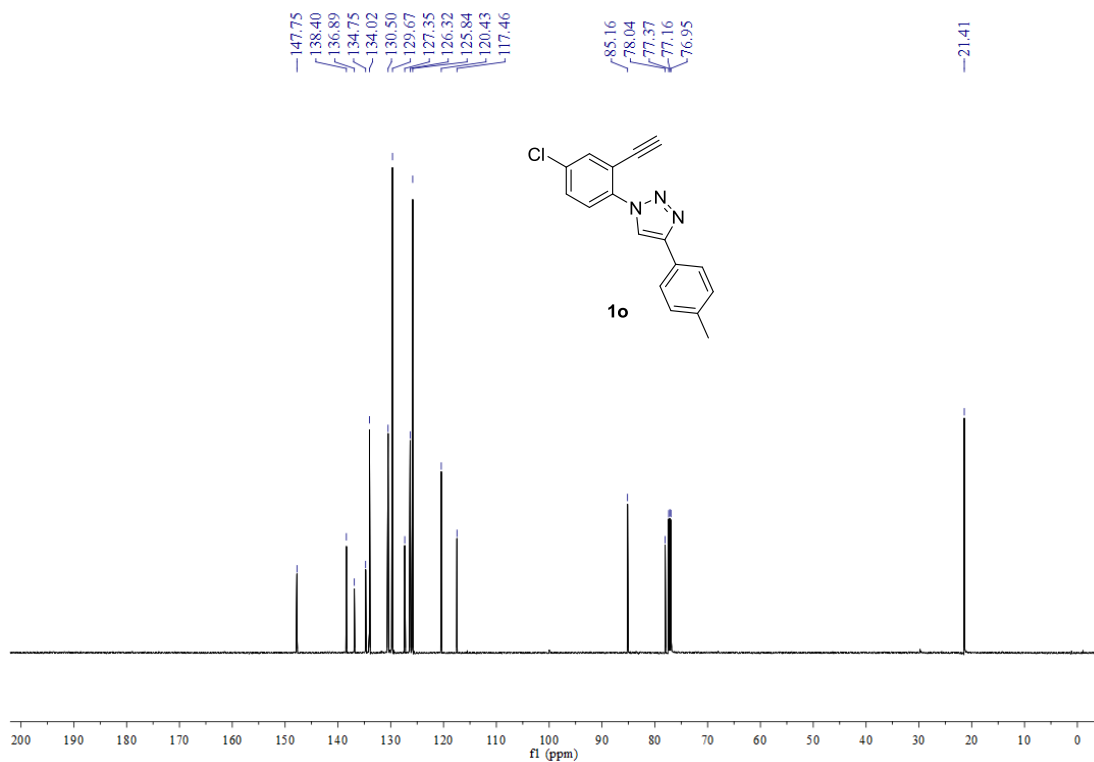

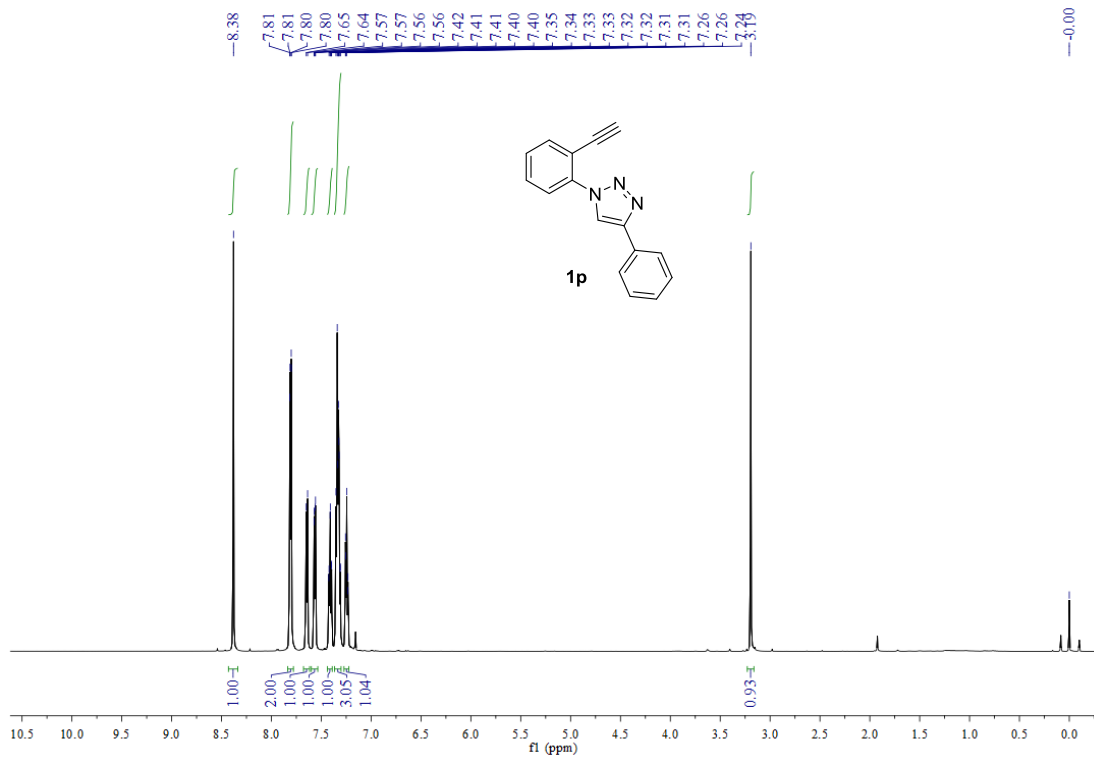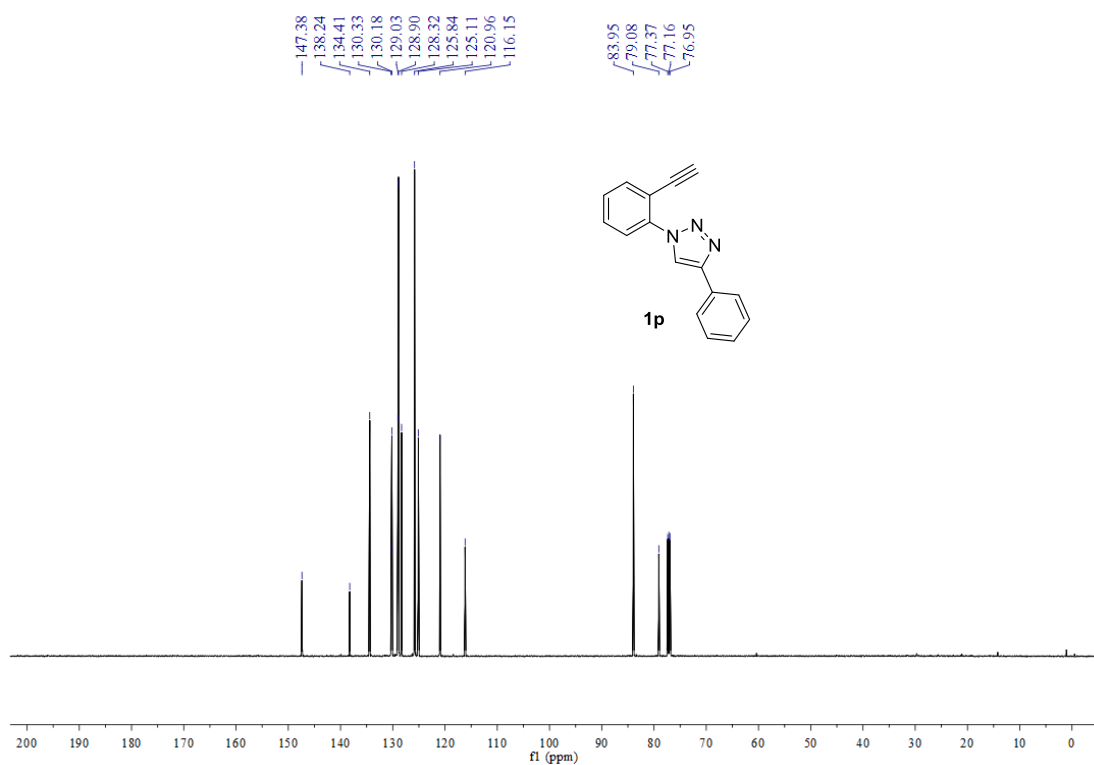



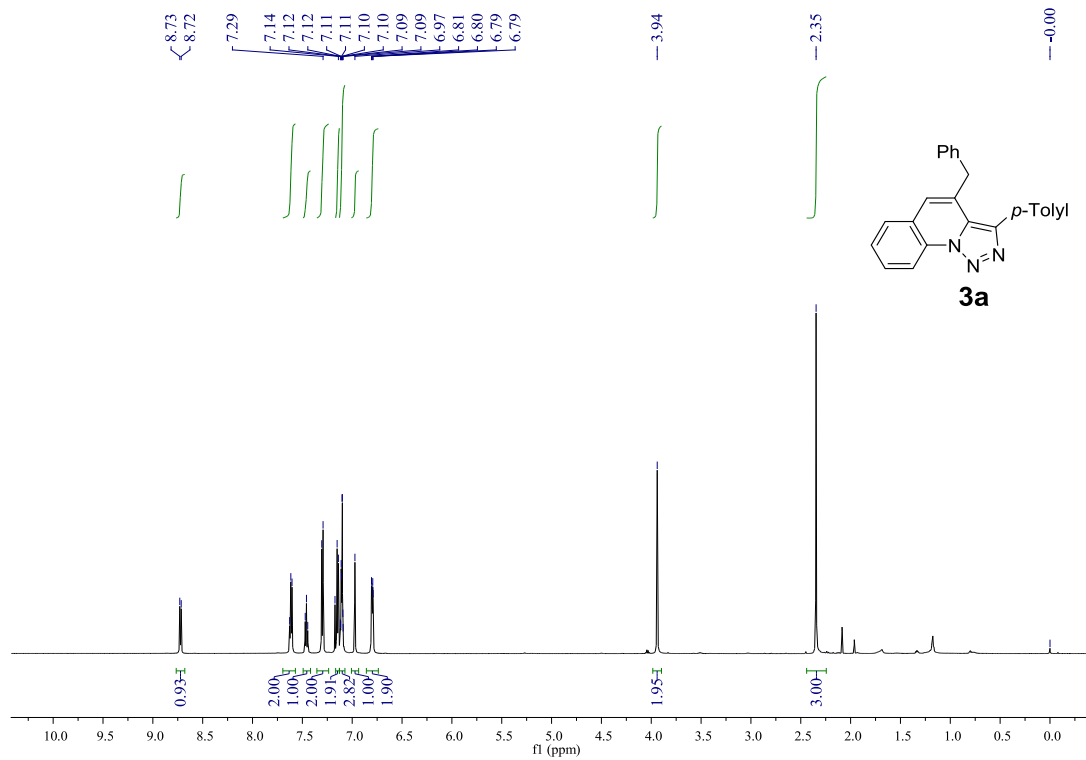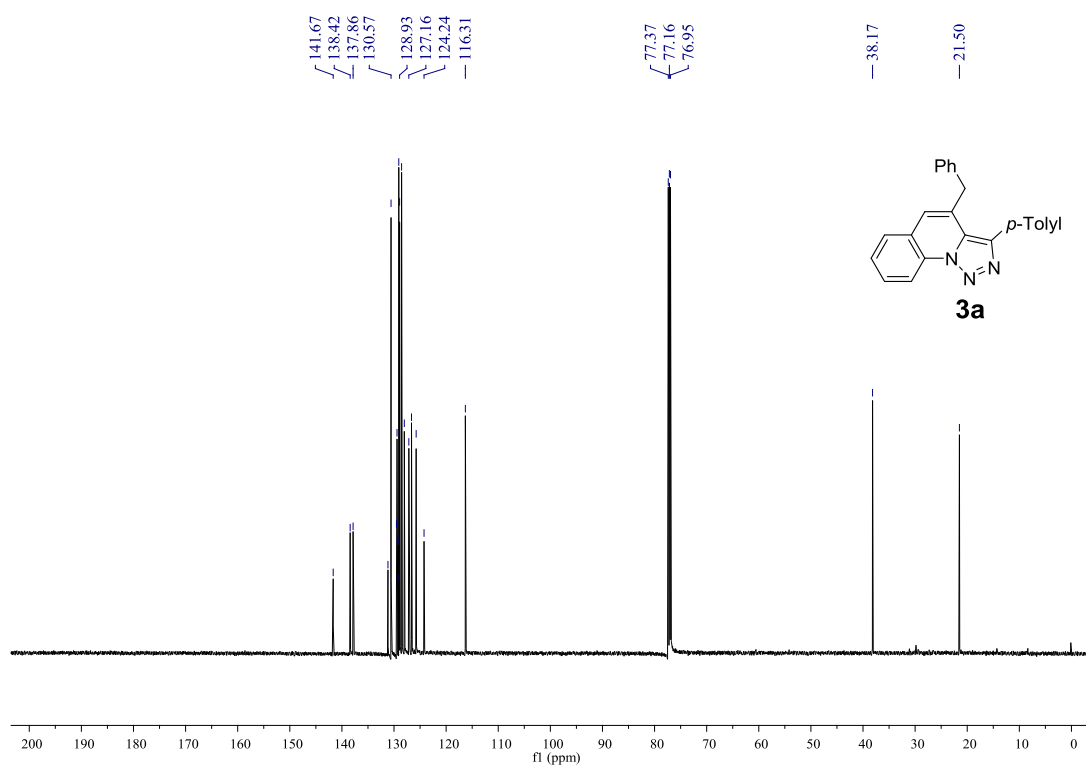

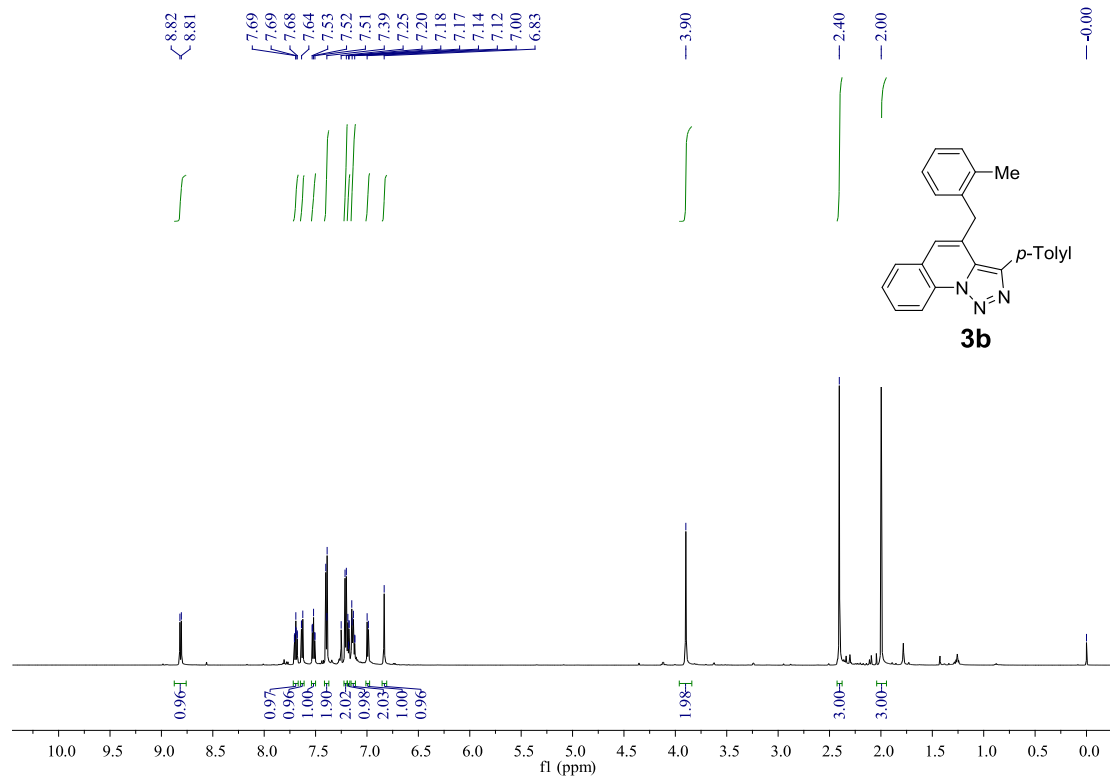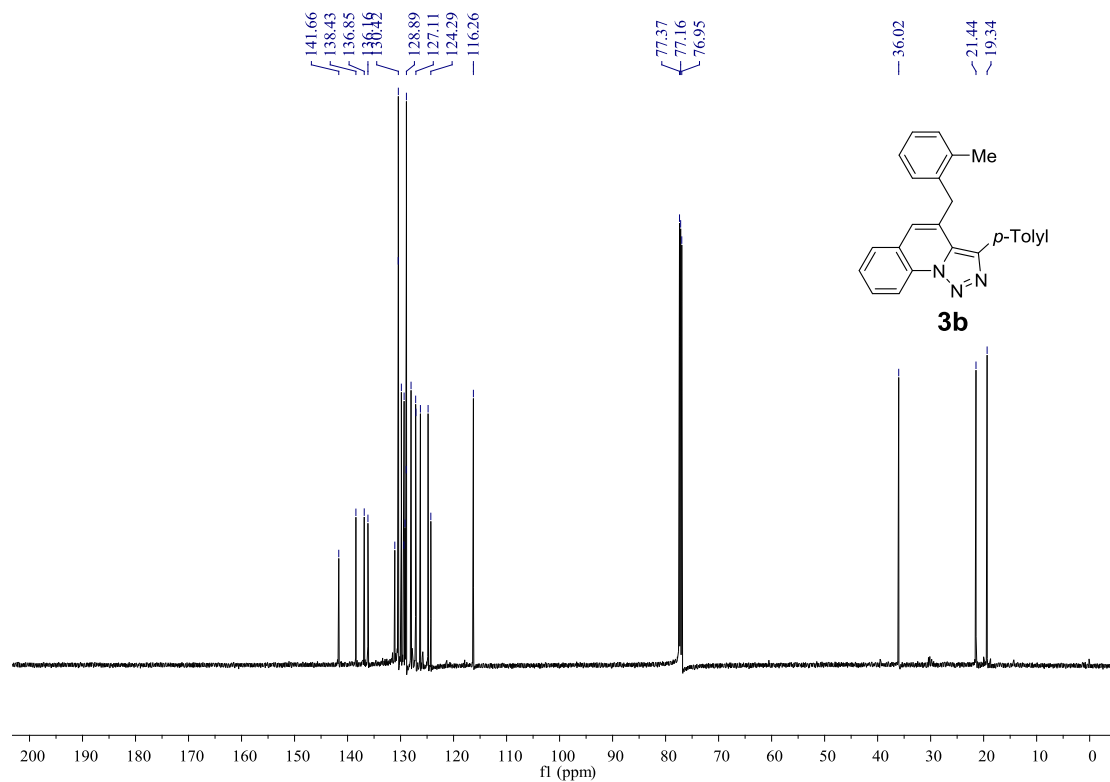

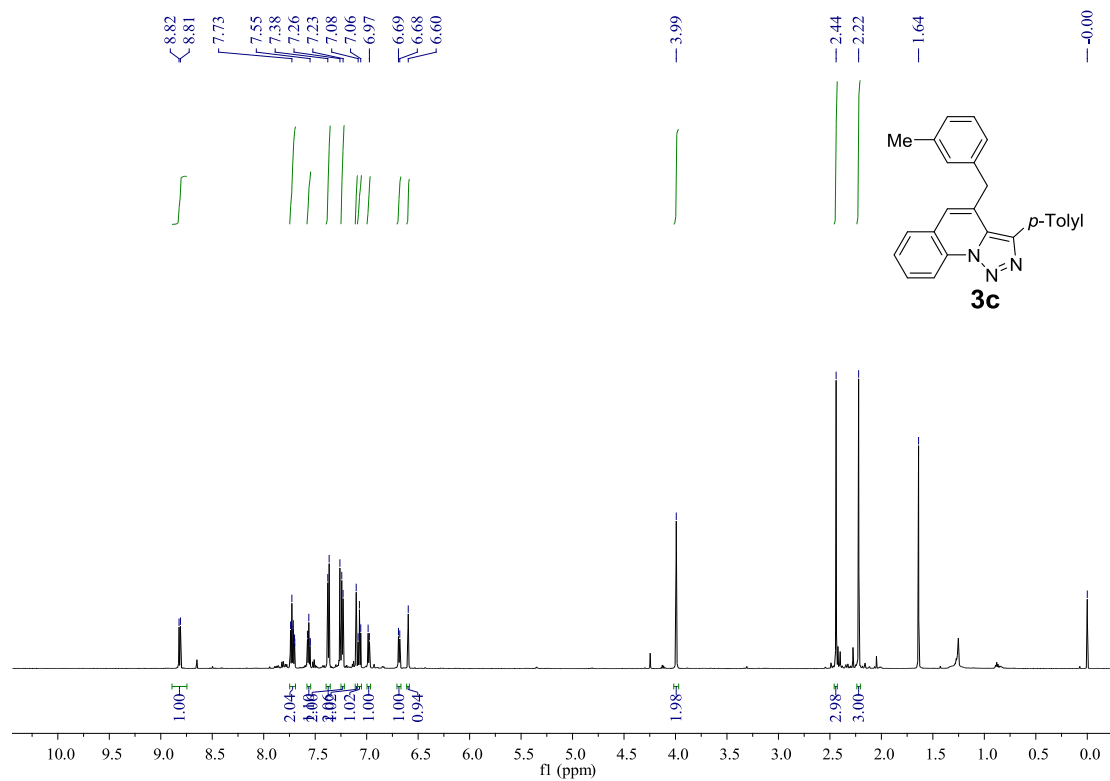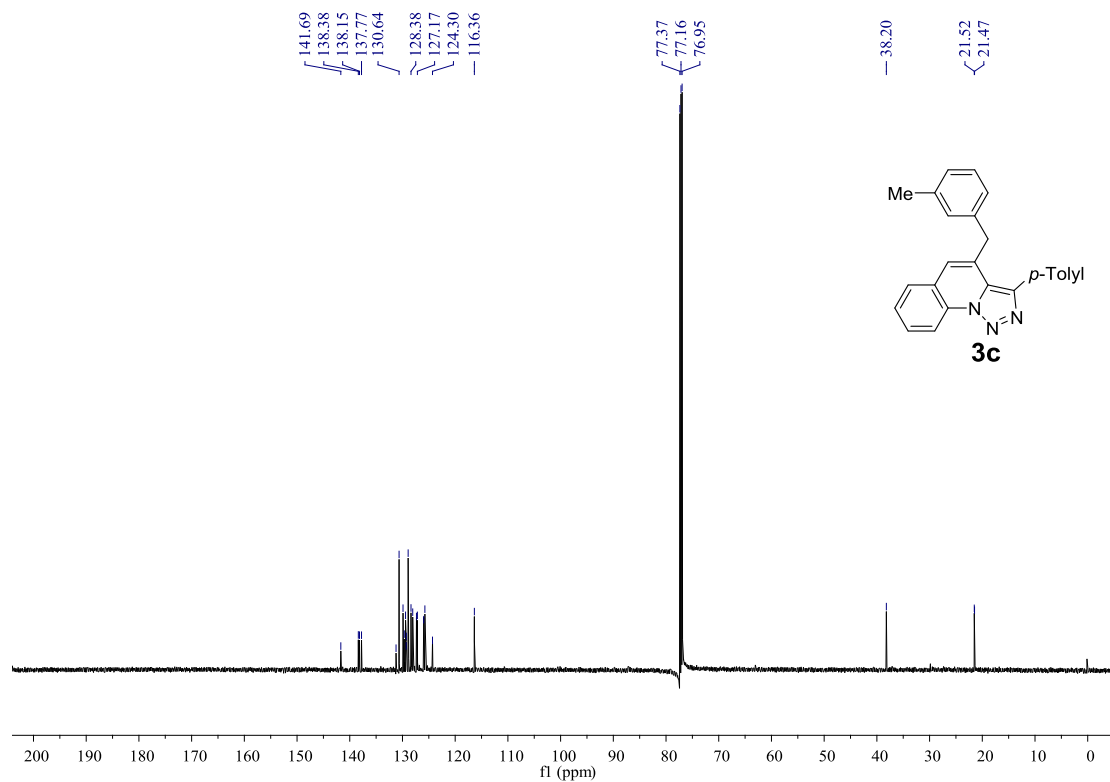

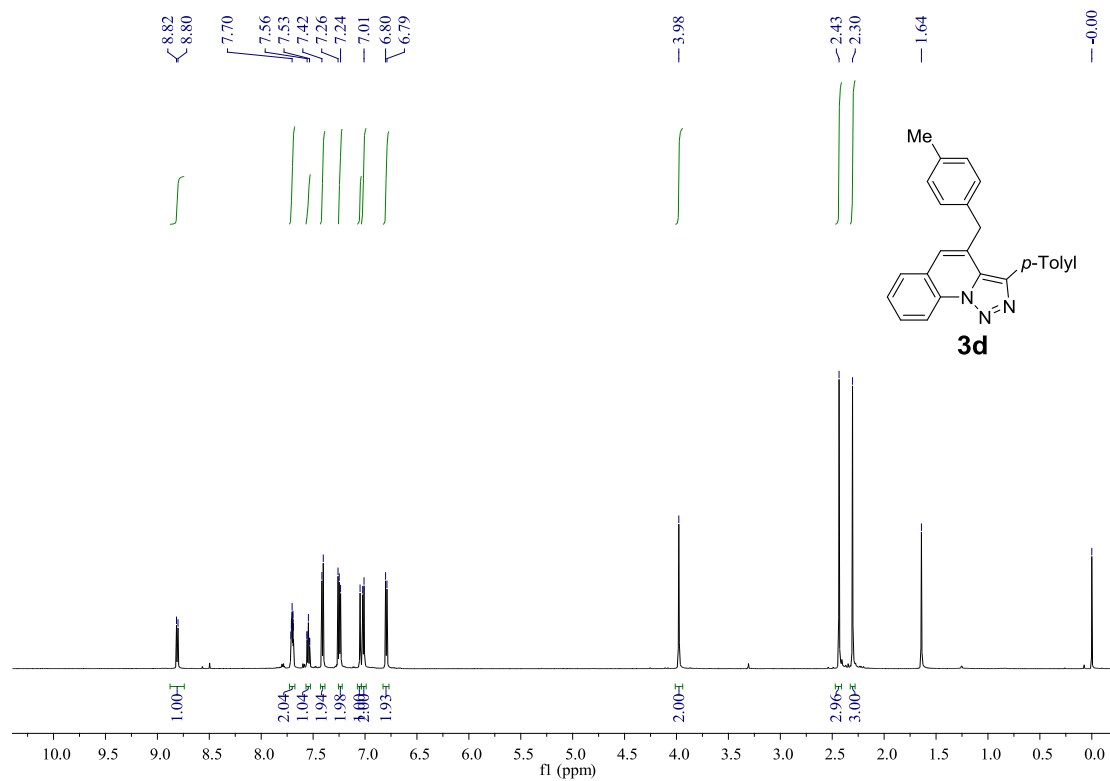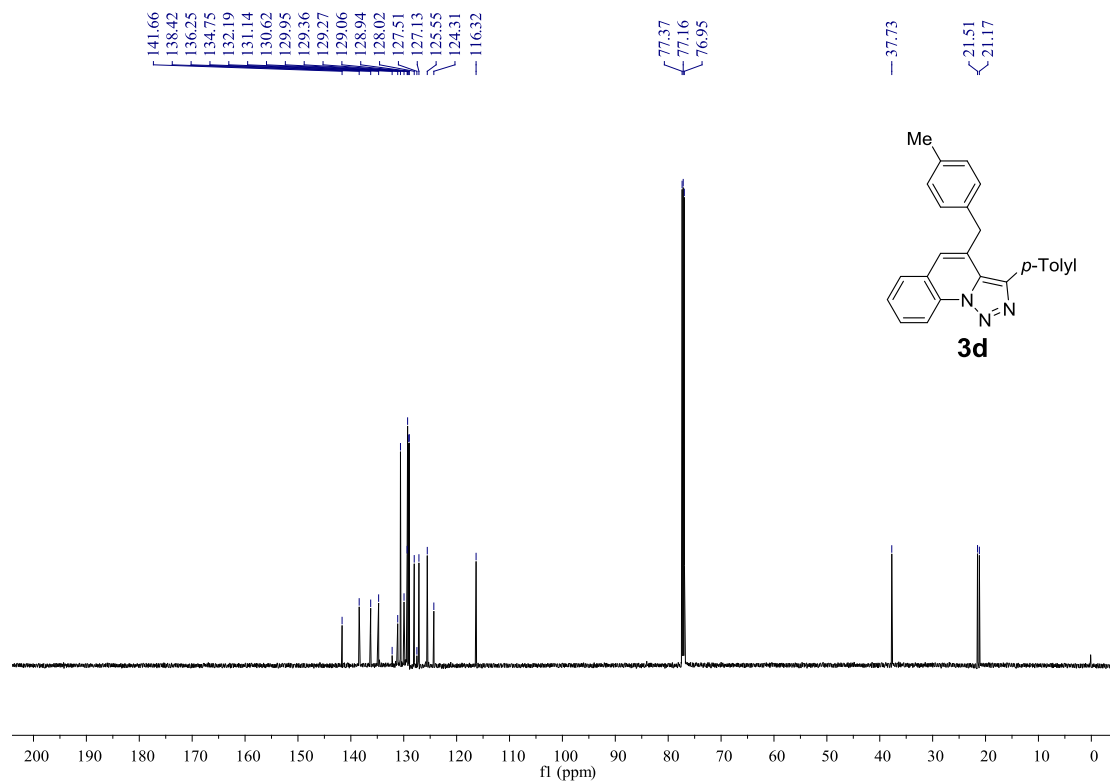

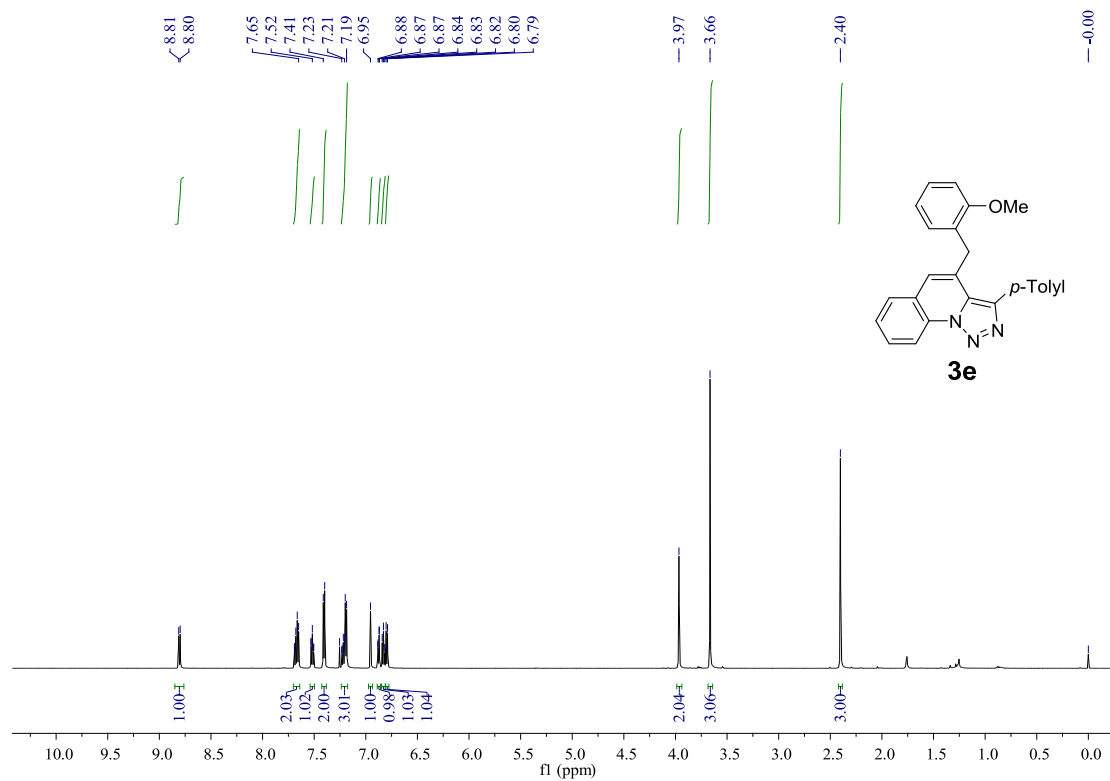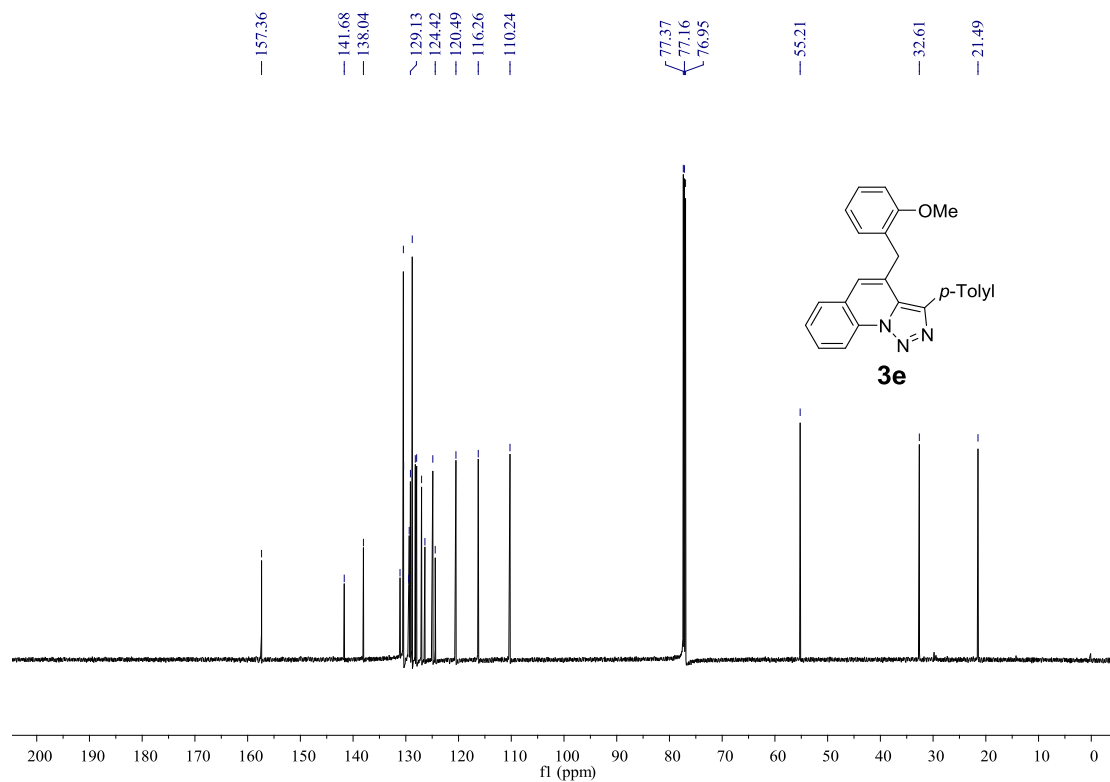

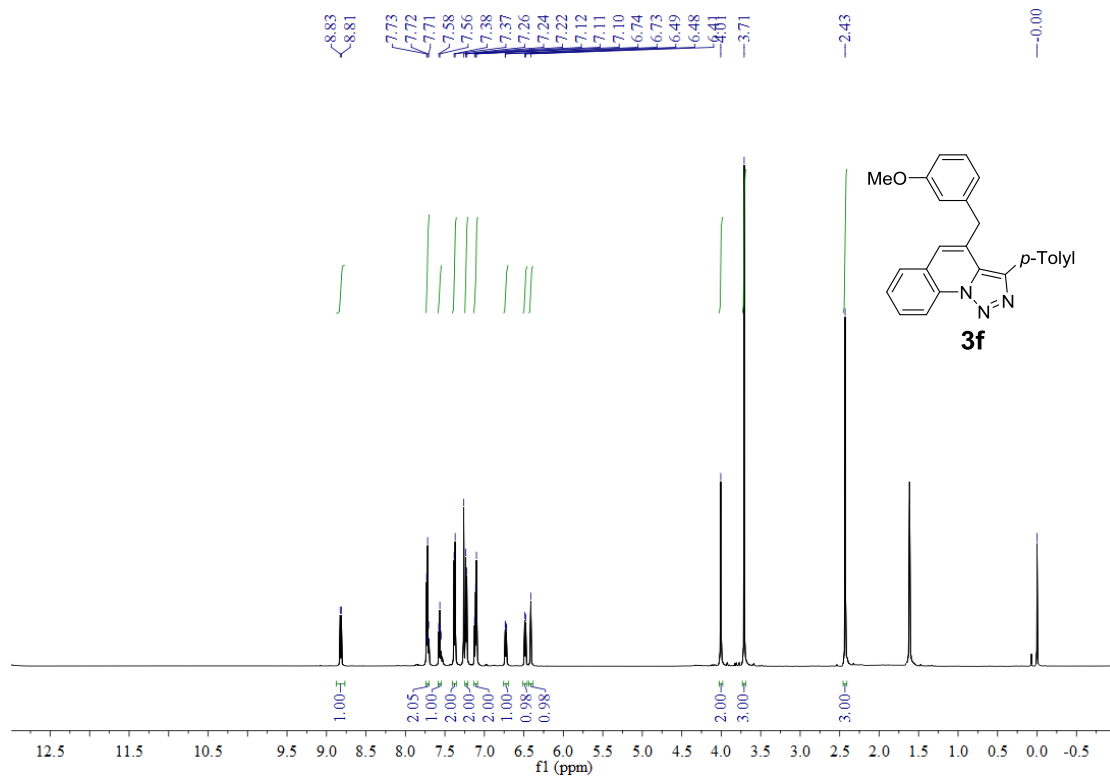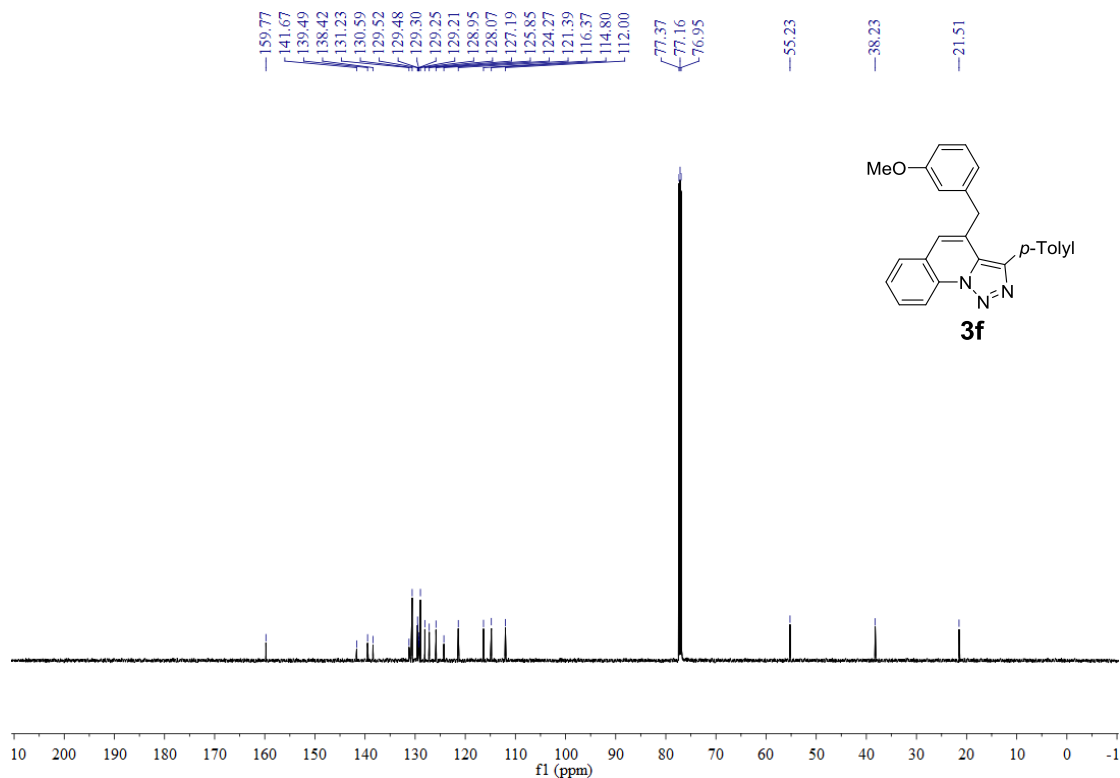

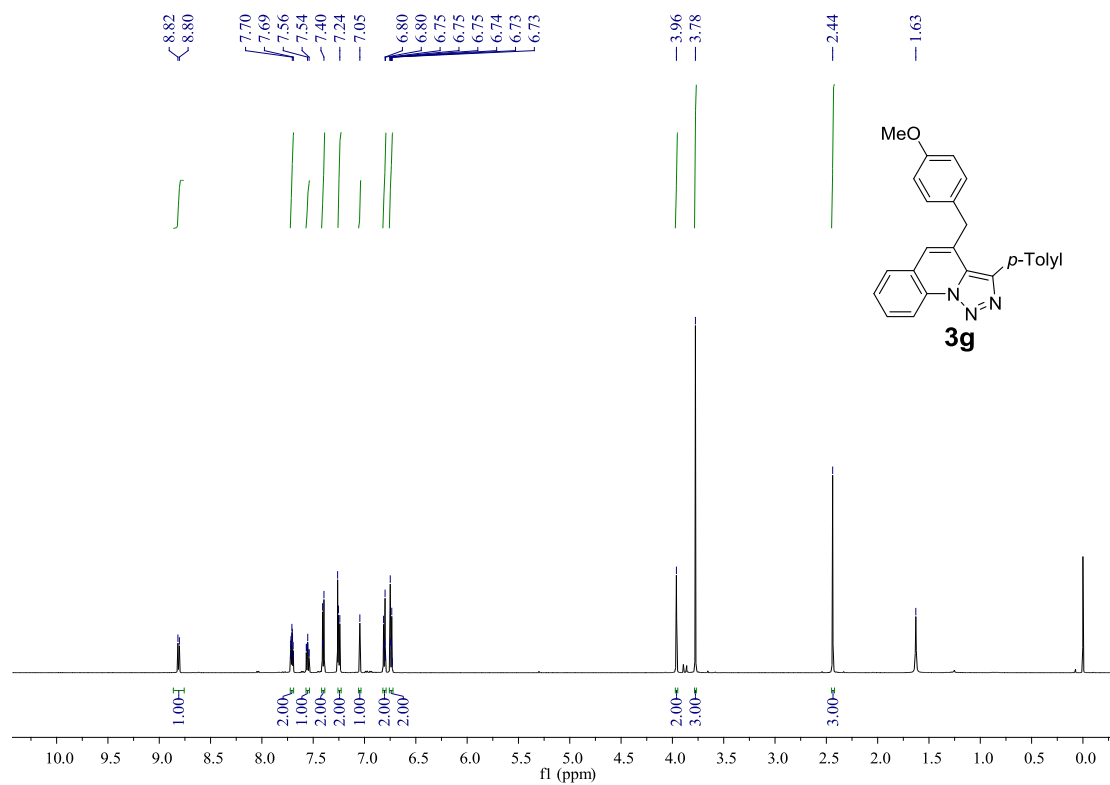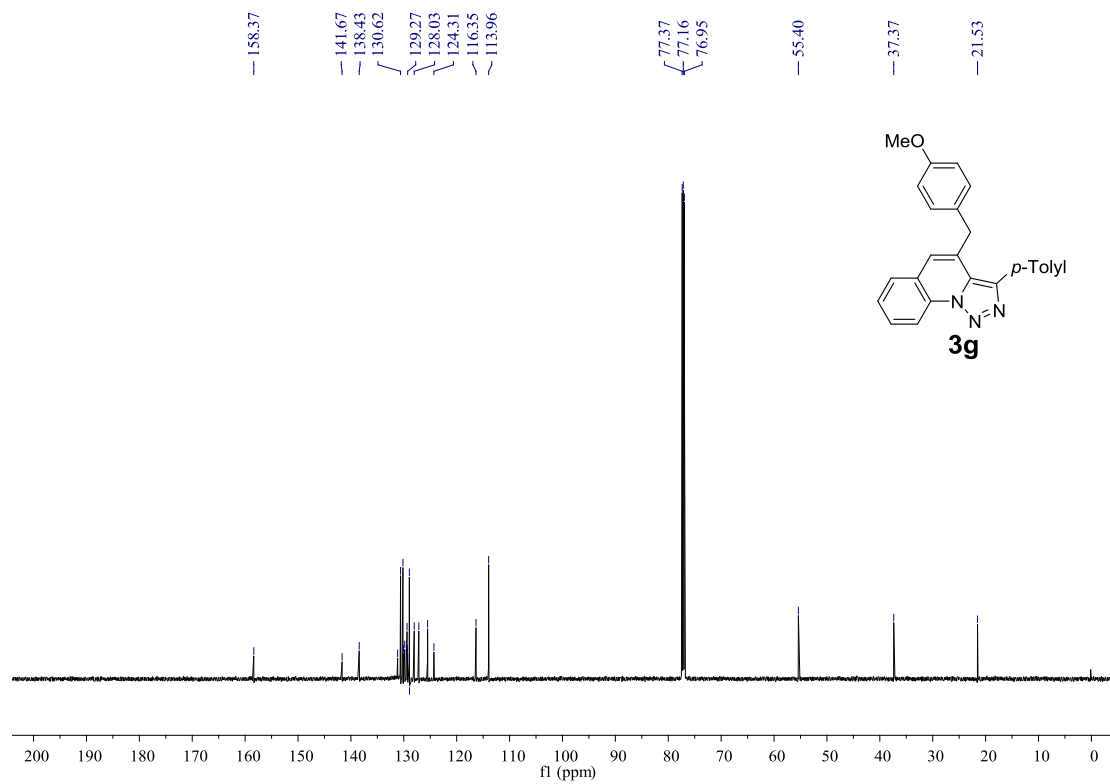

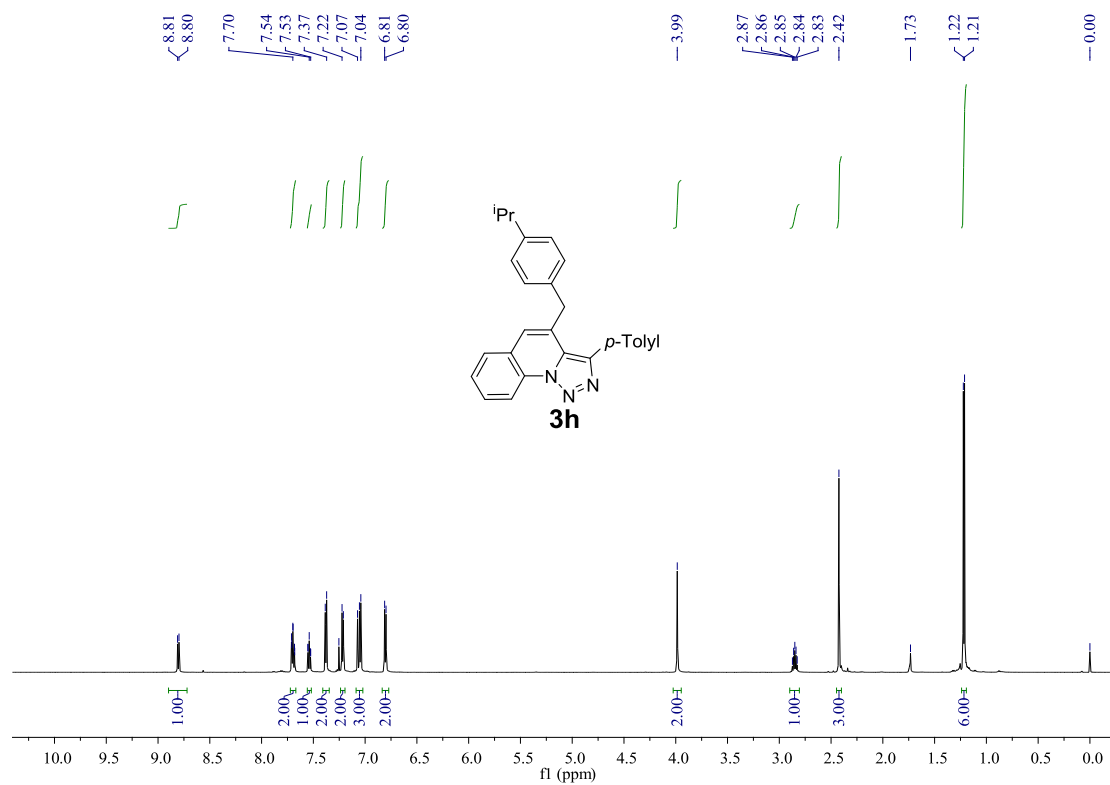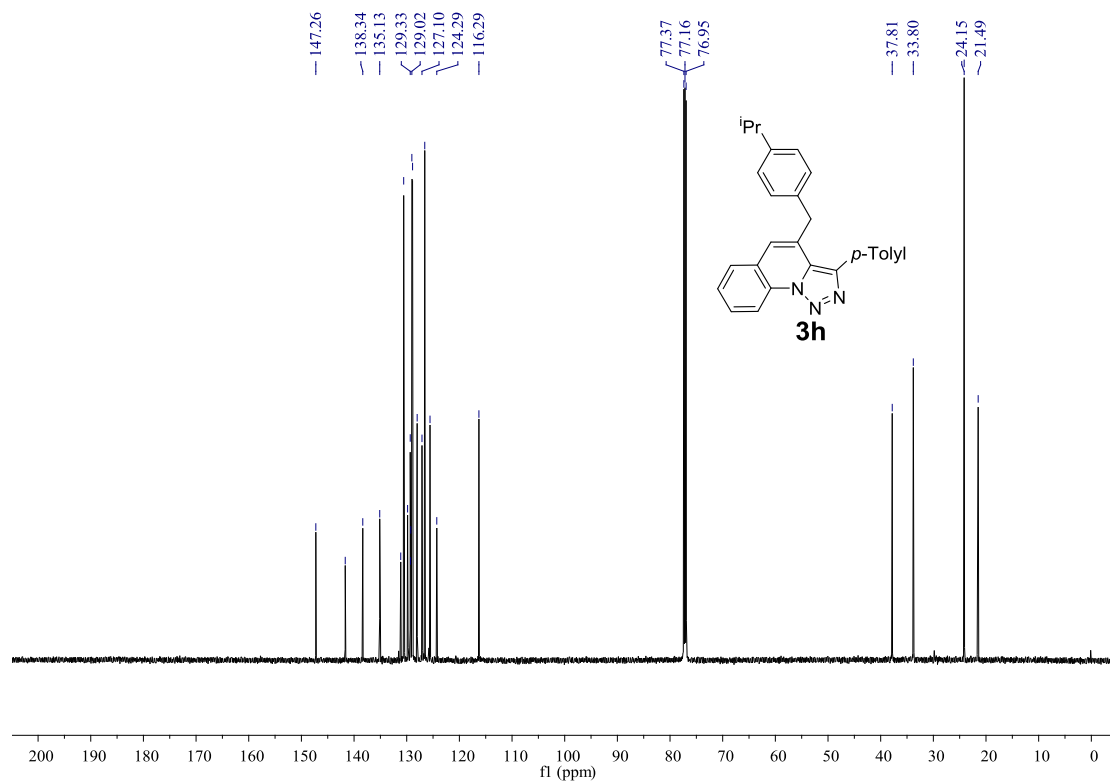



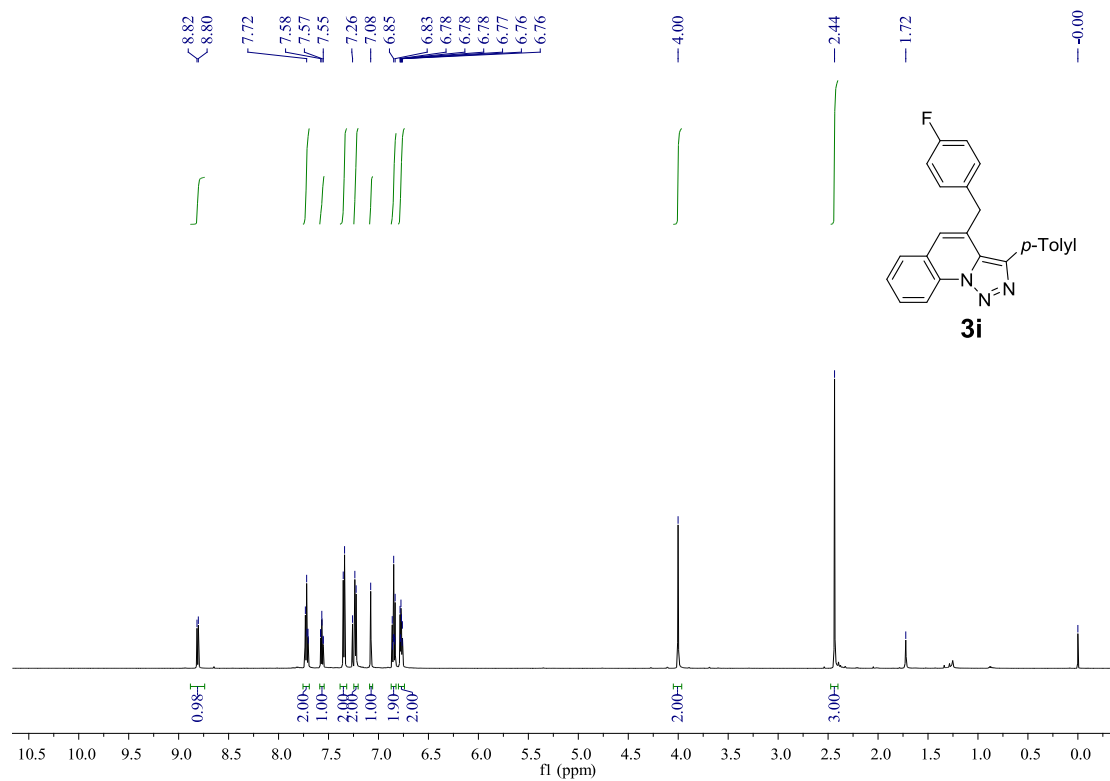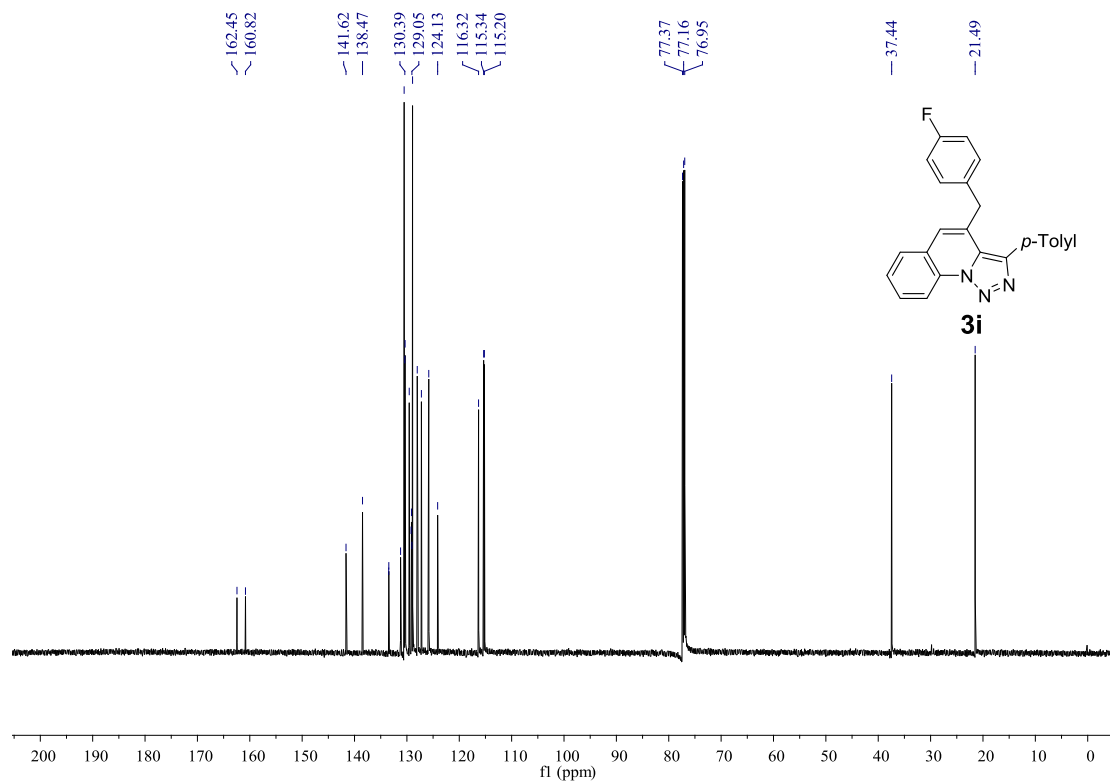

YJH-960-3-2

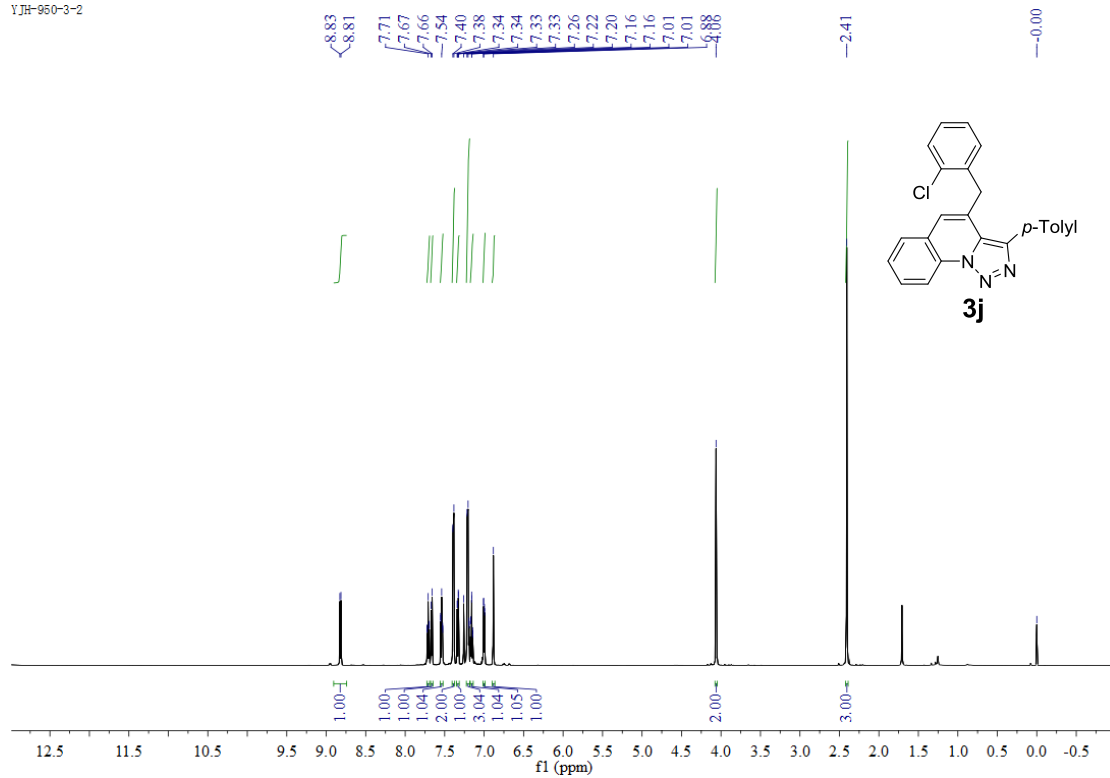

YJH-960-3-2

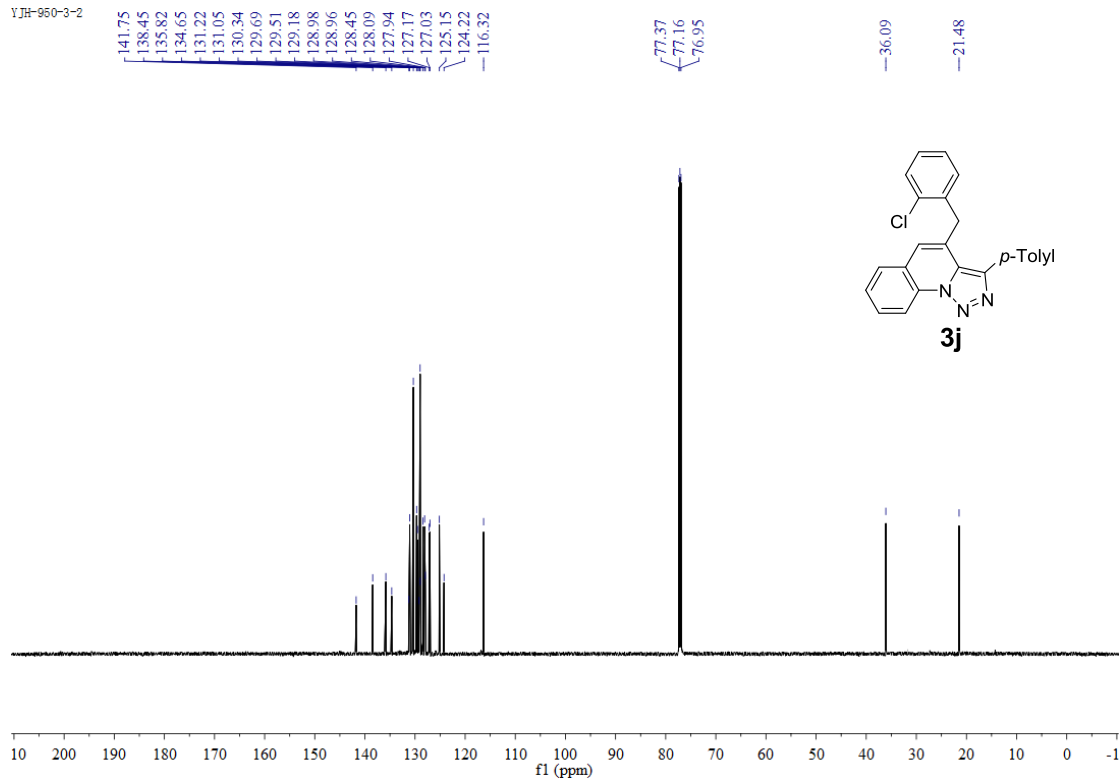

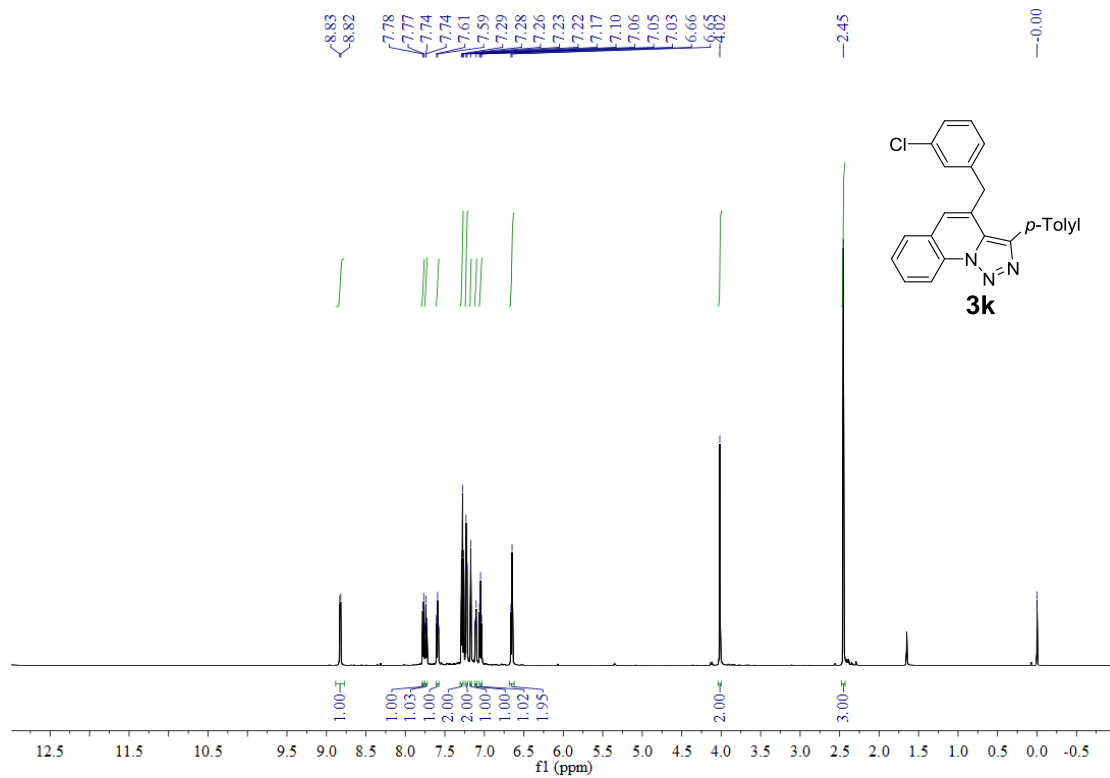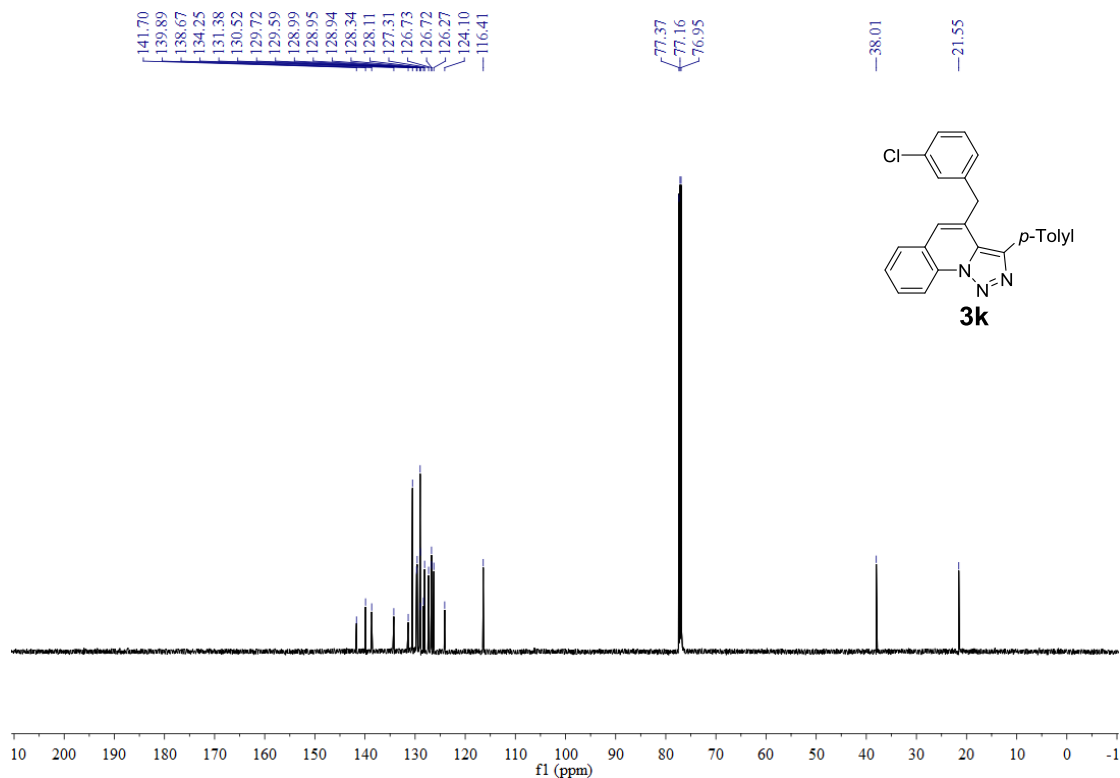

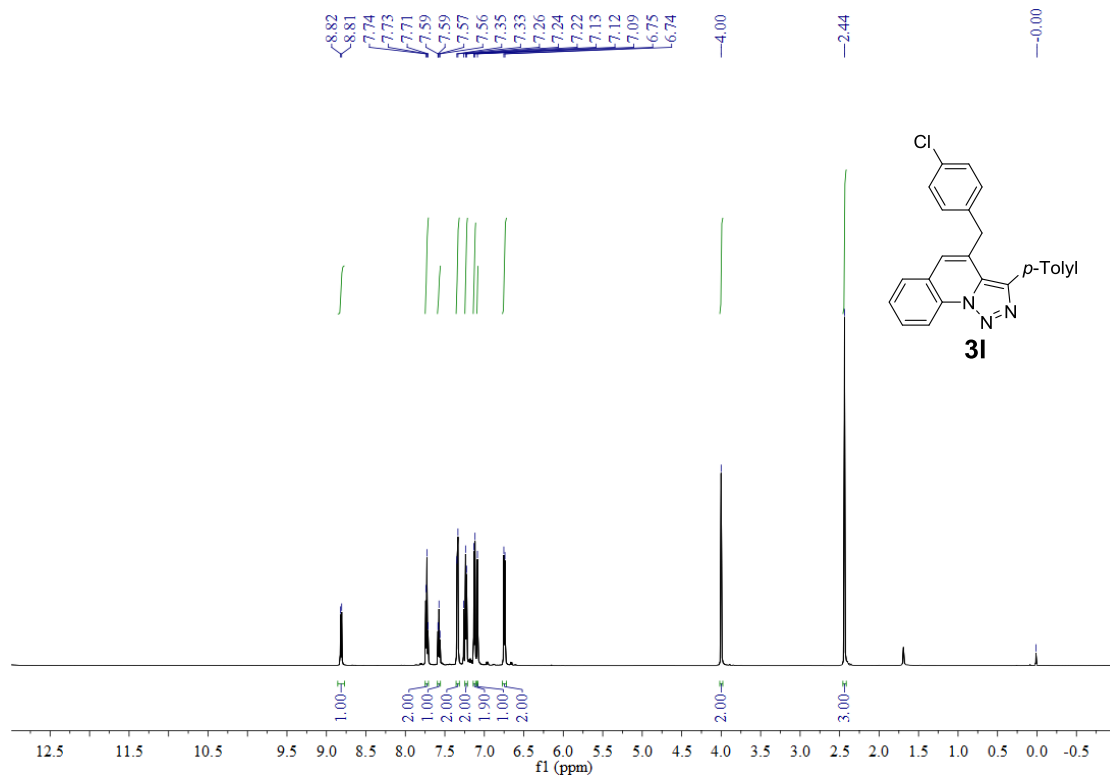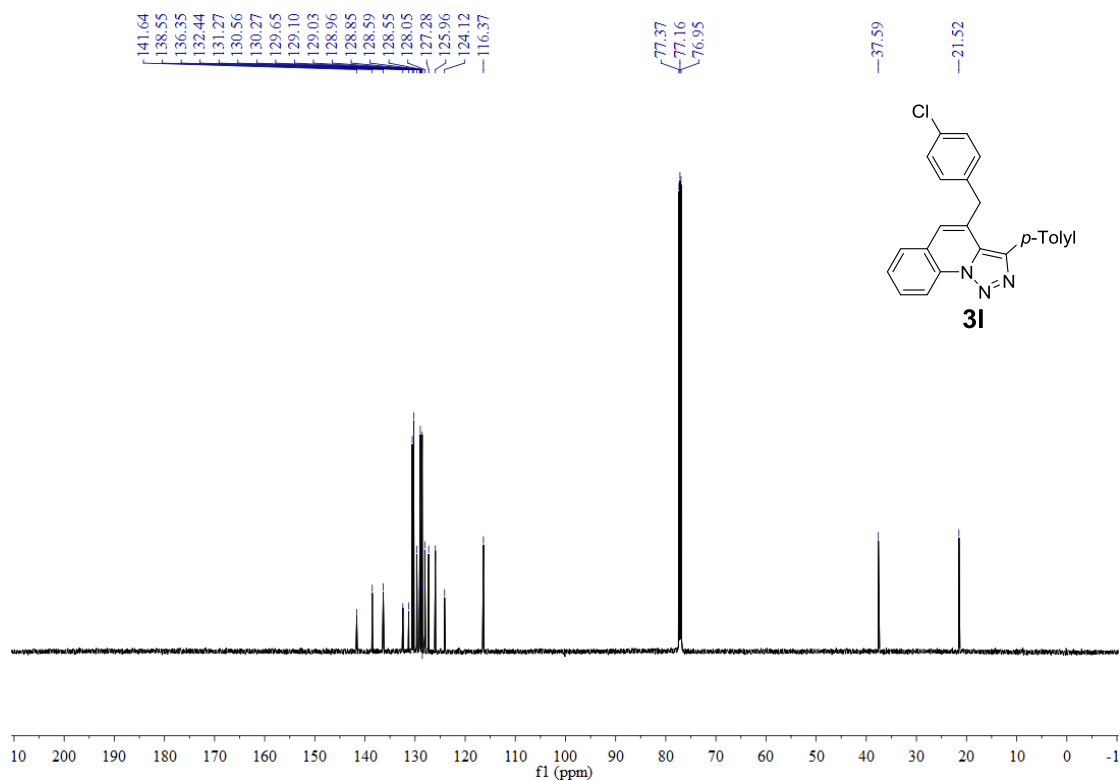

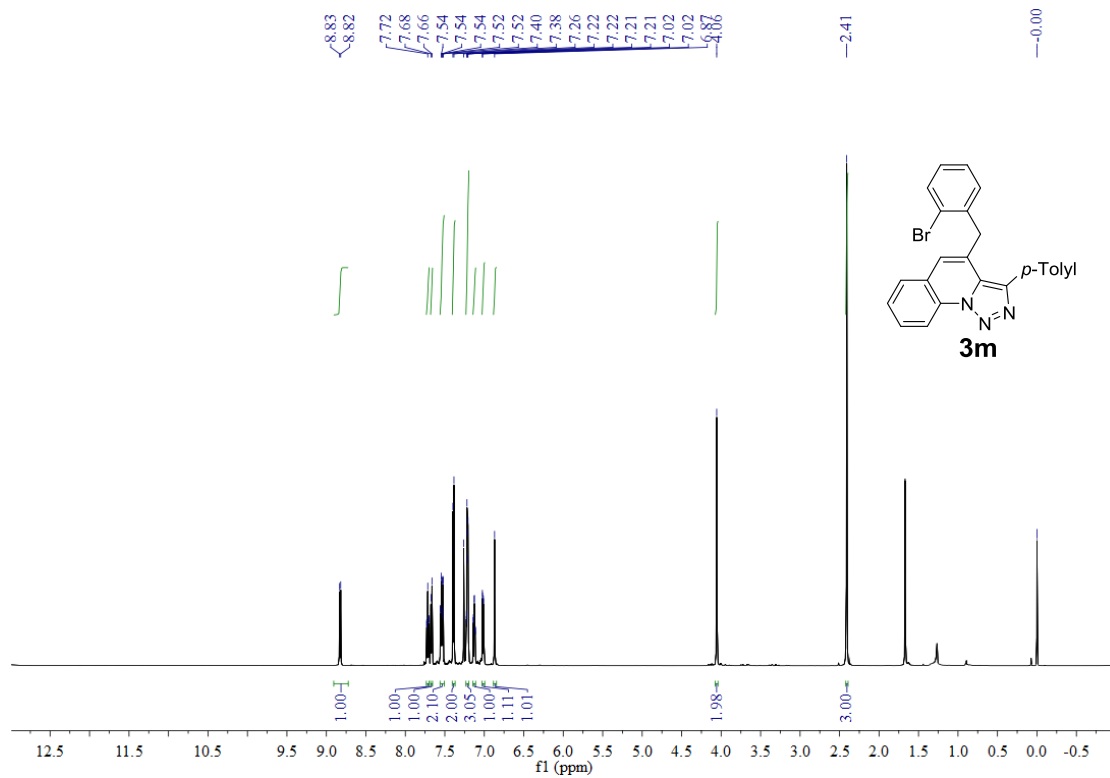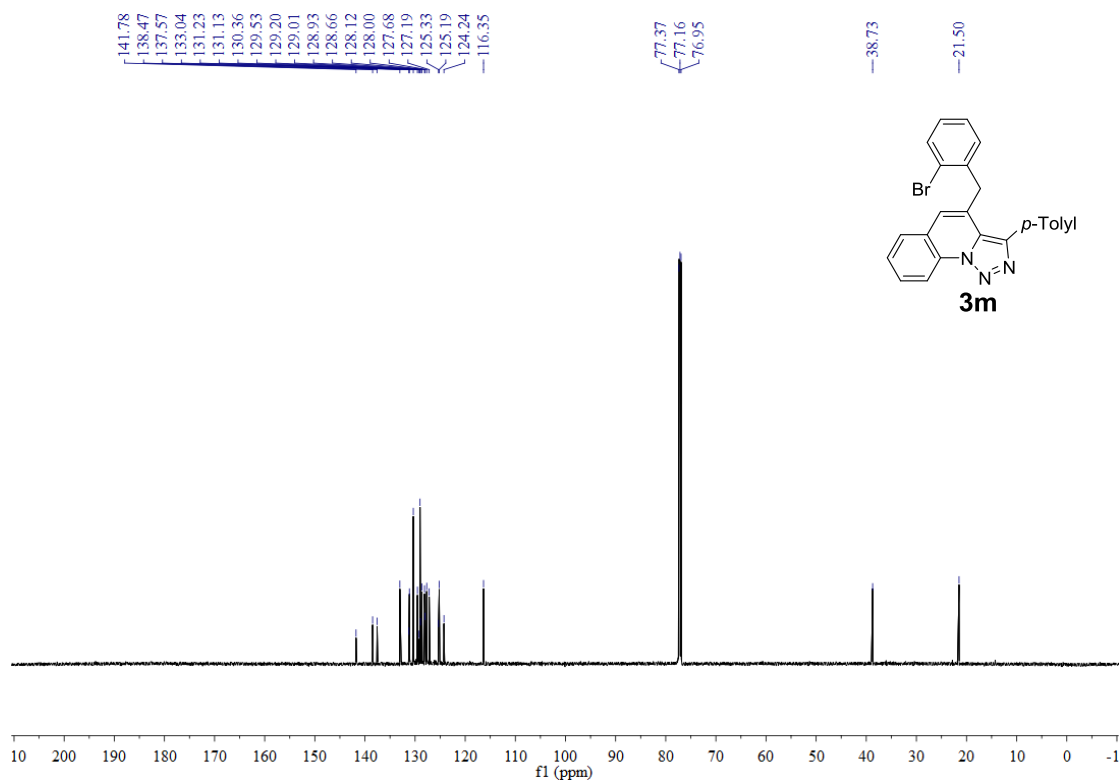

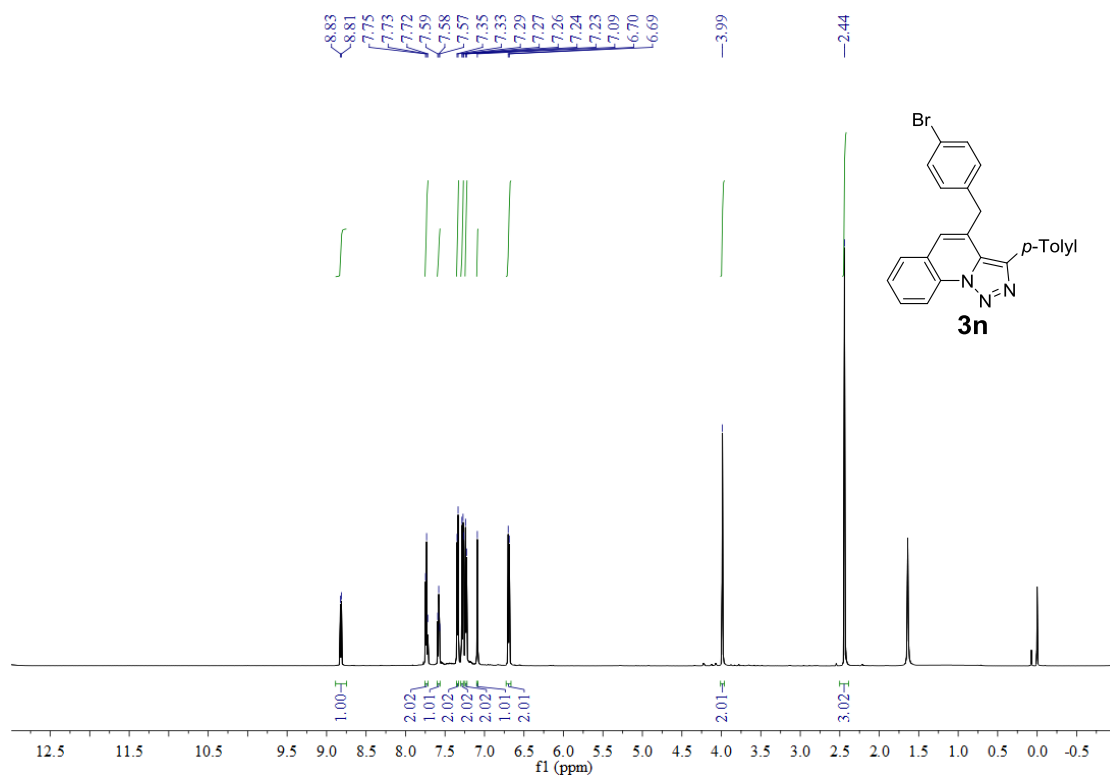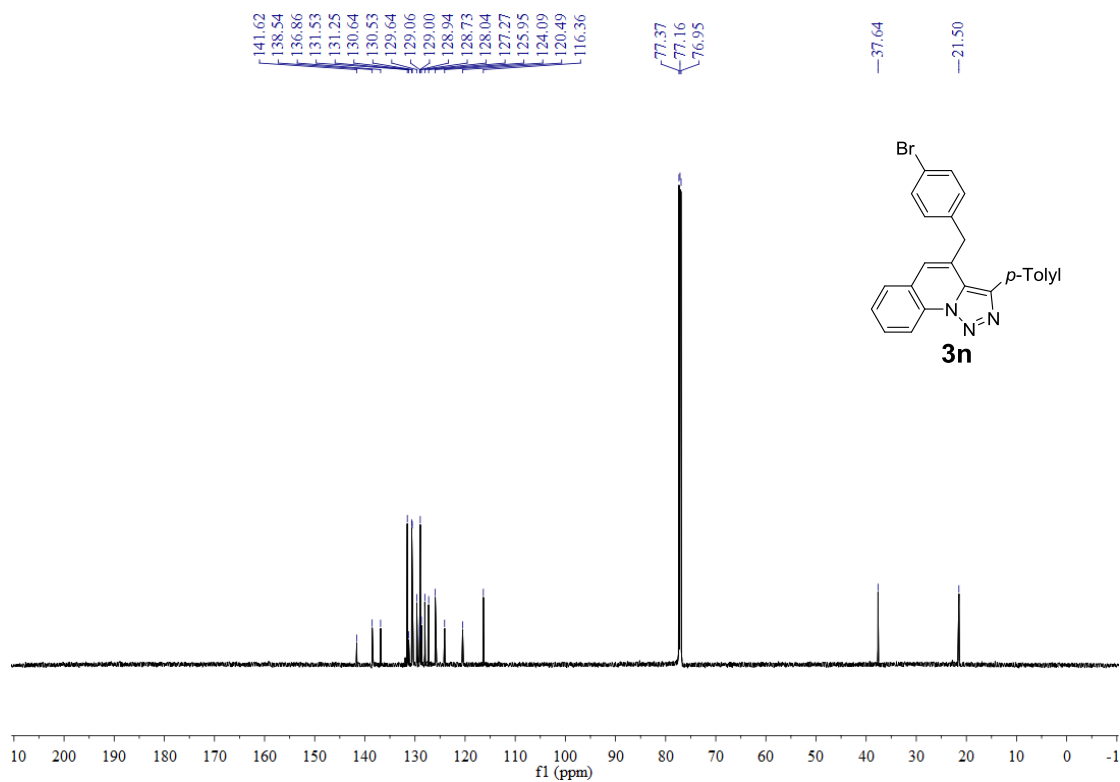

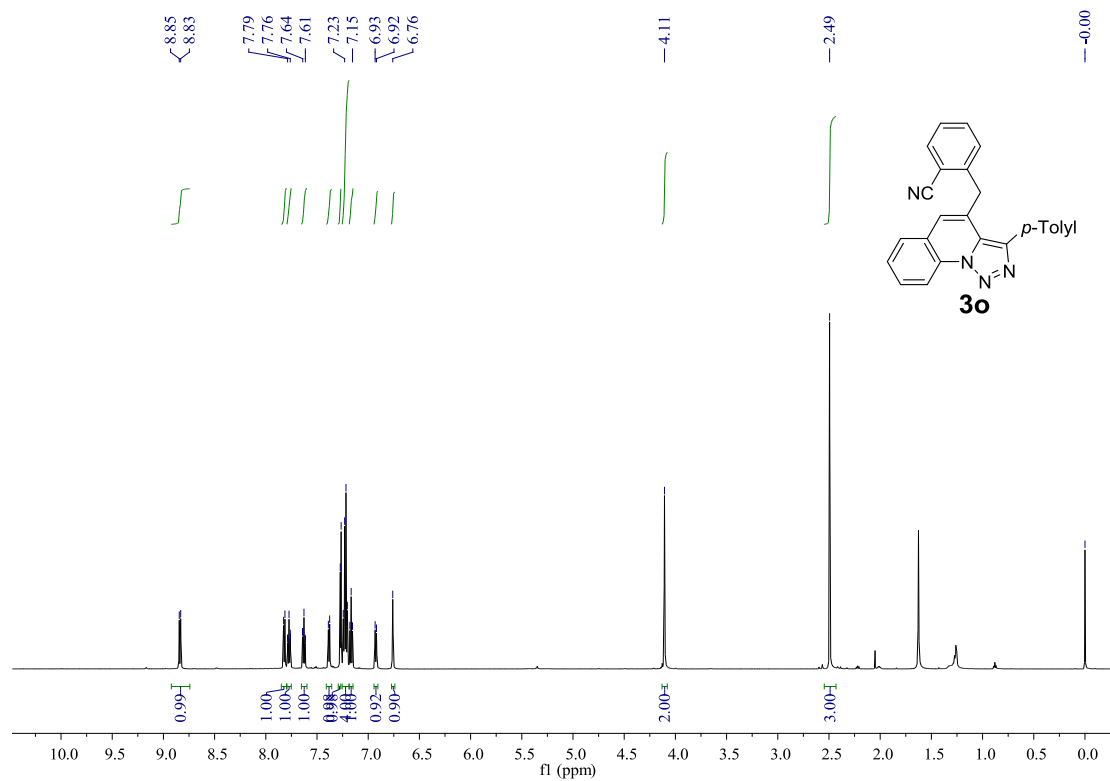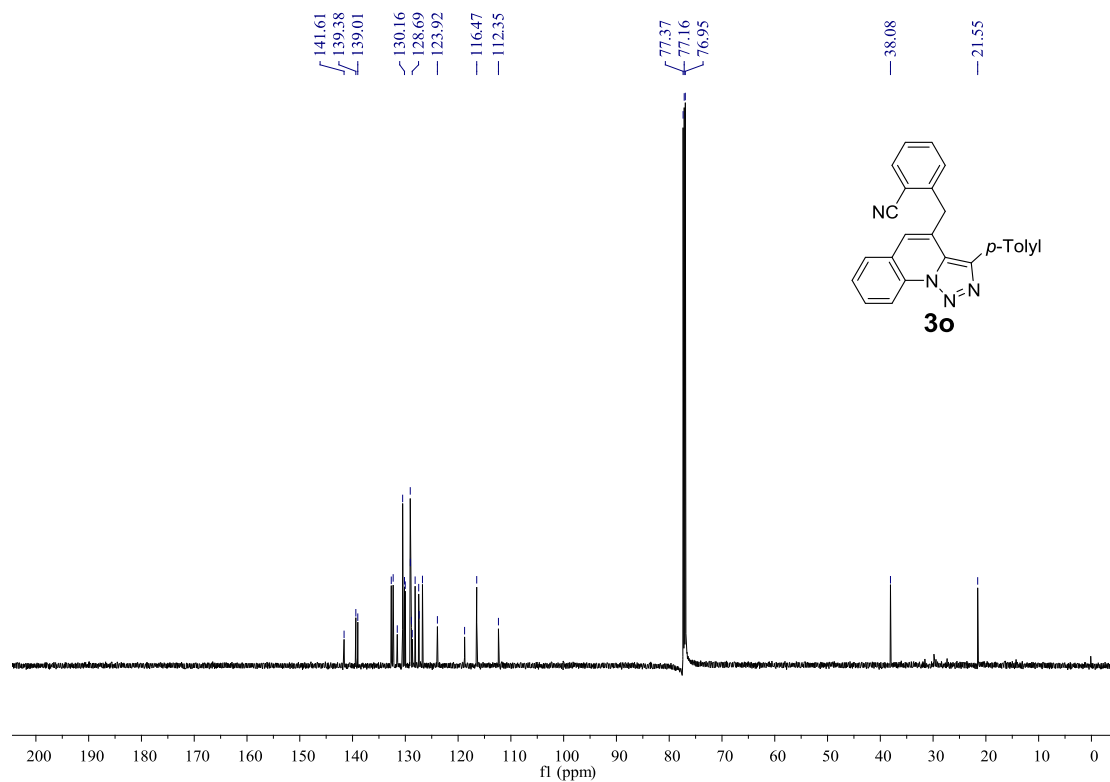

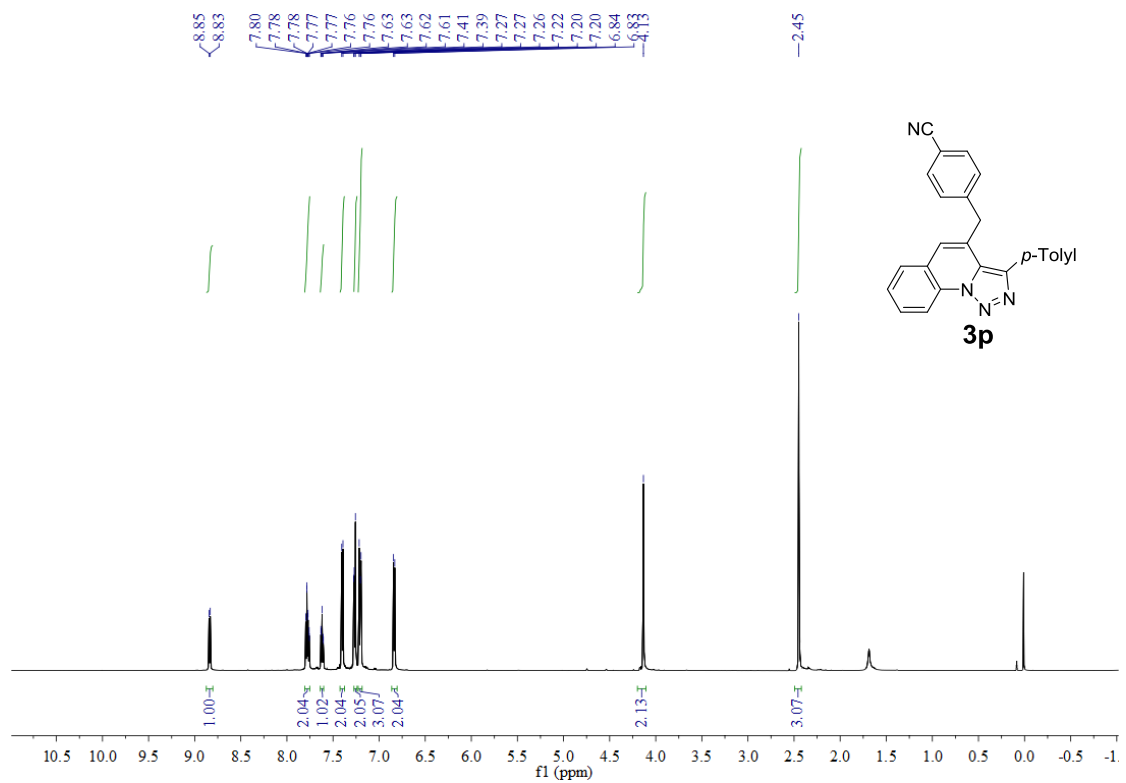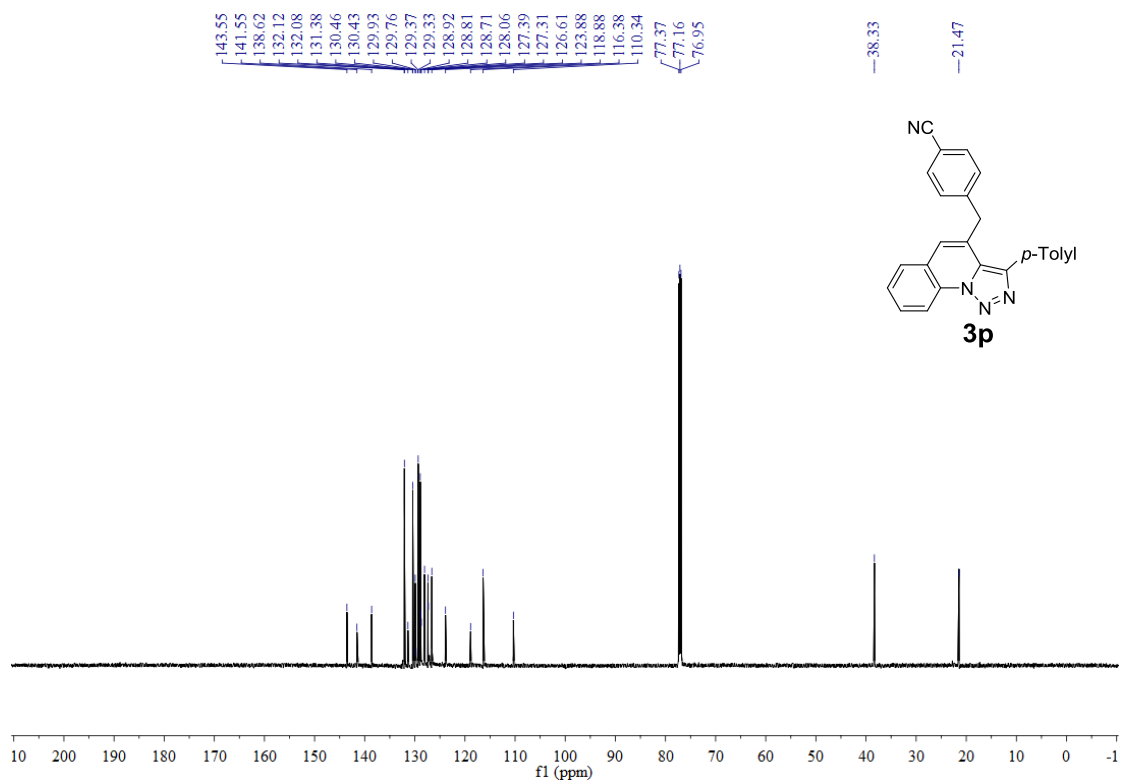



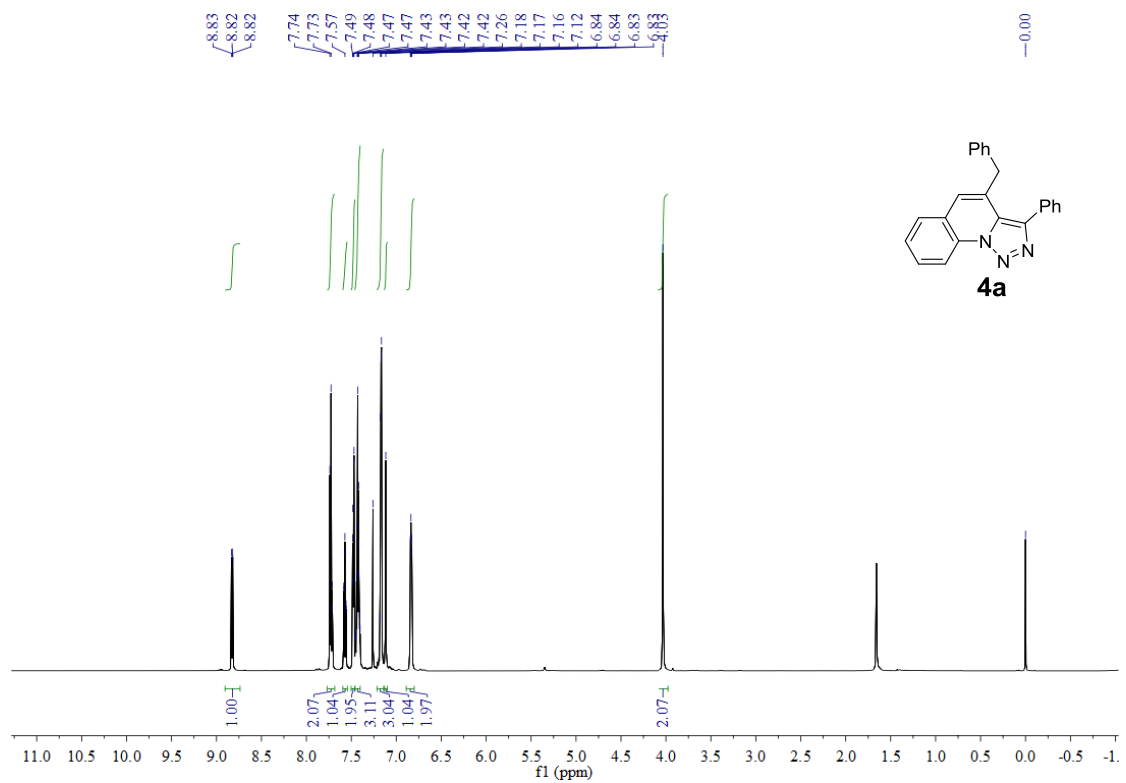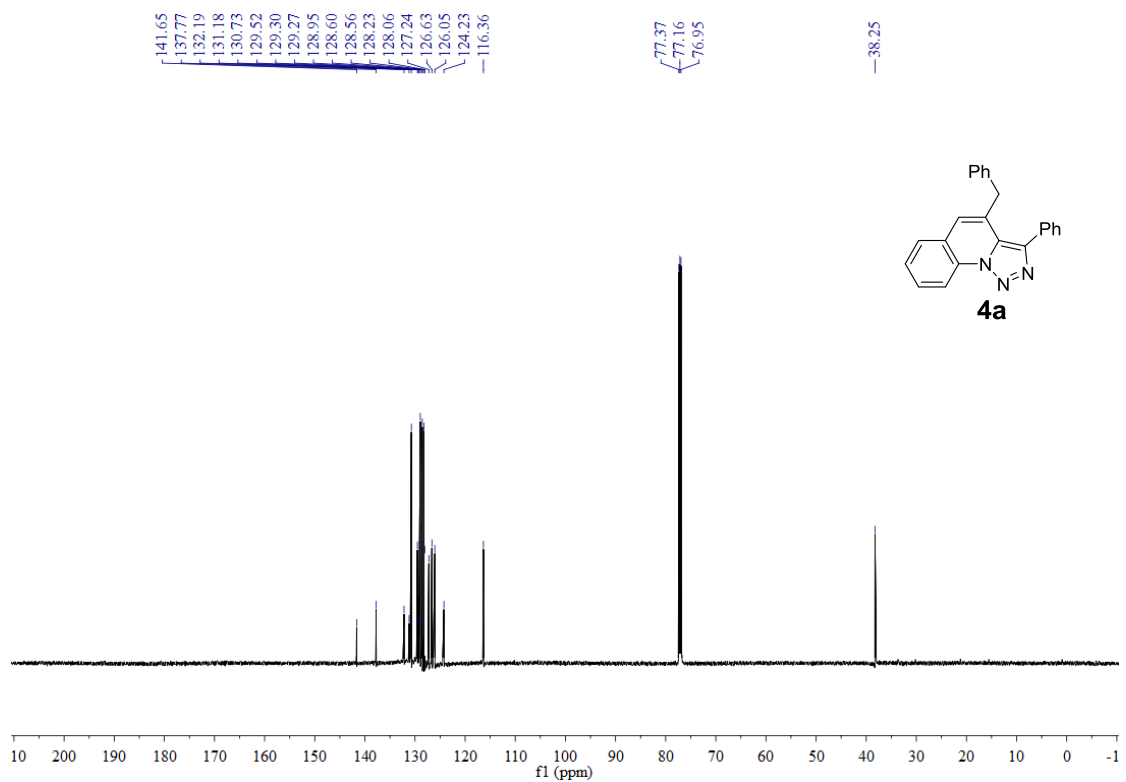

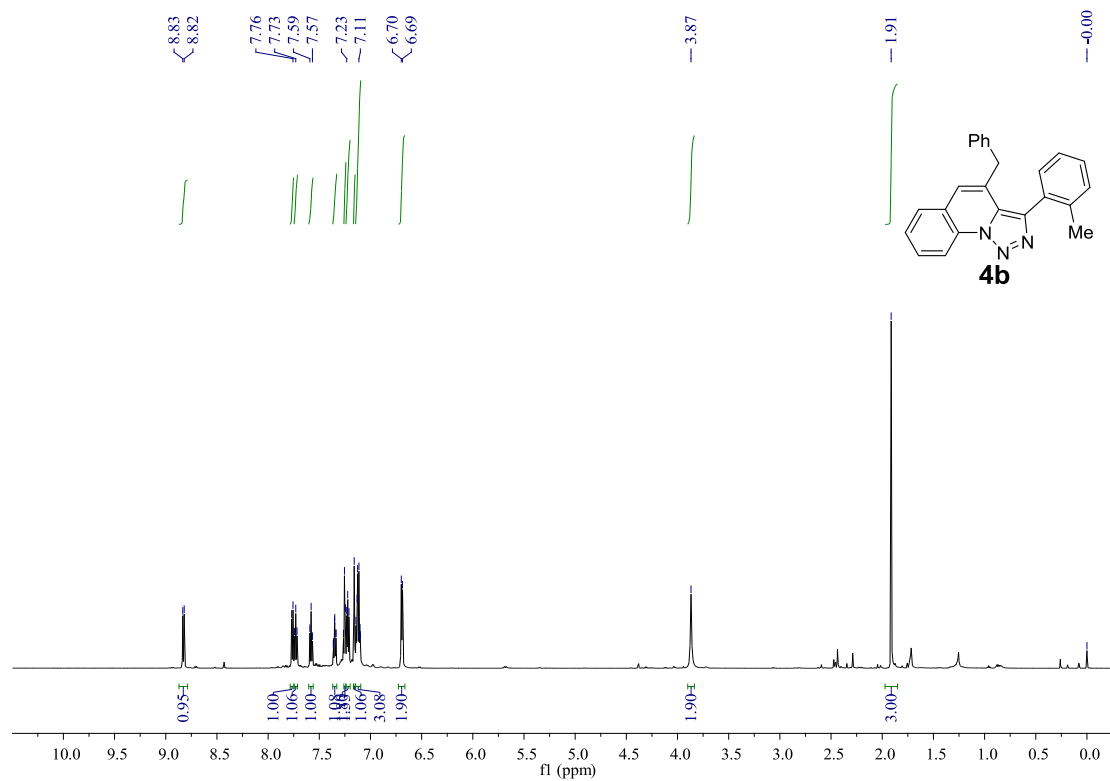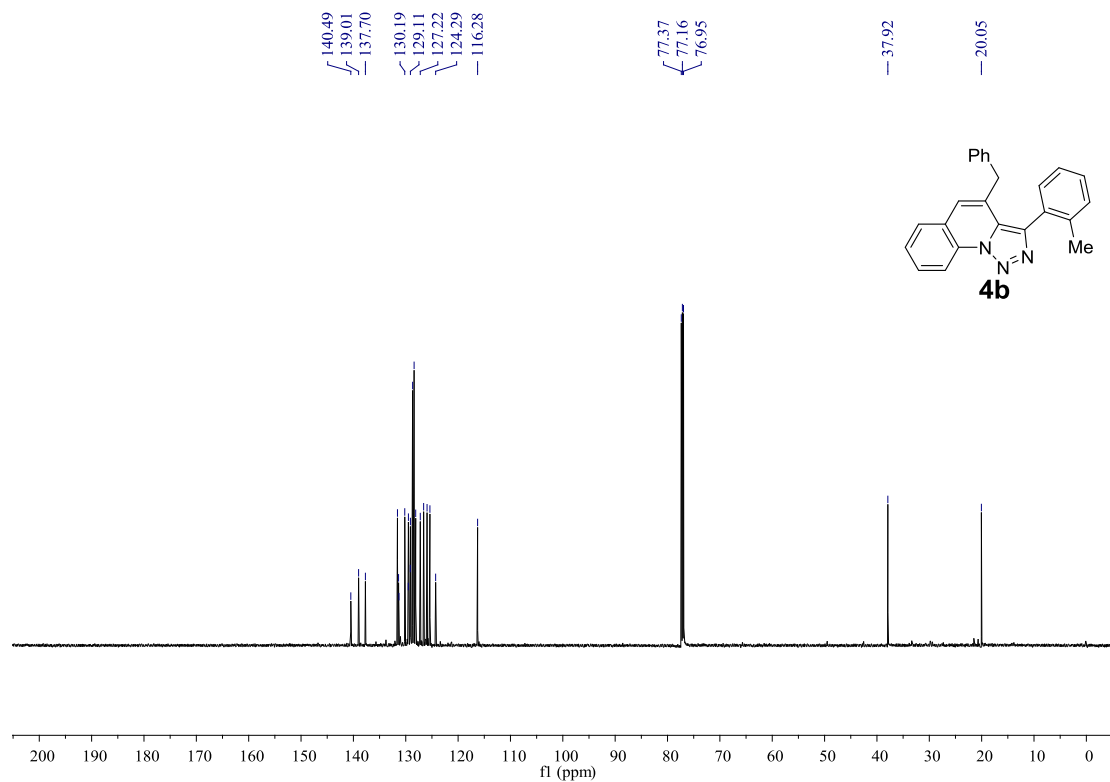

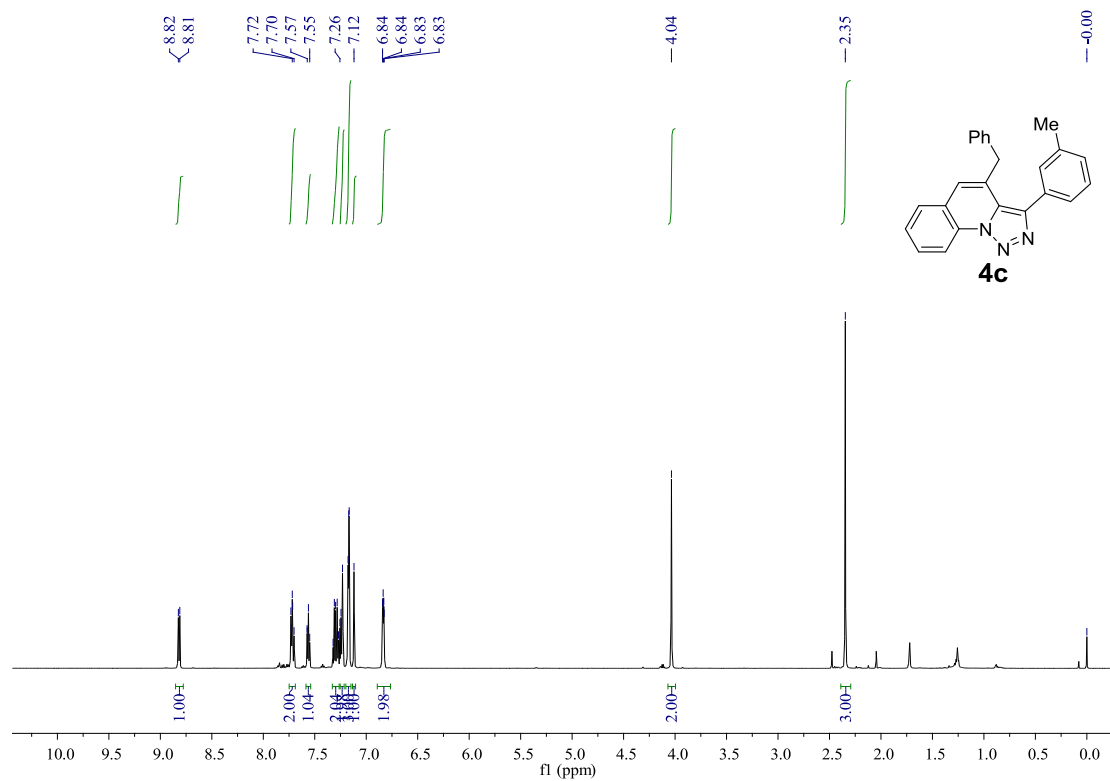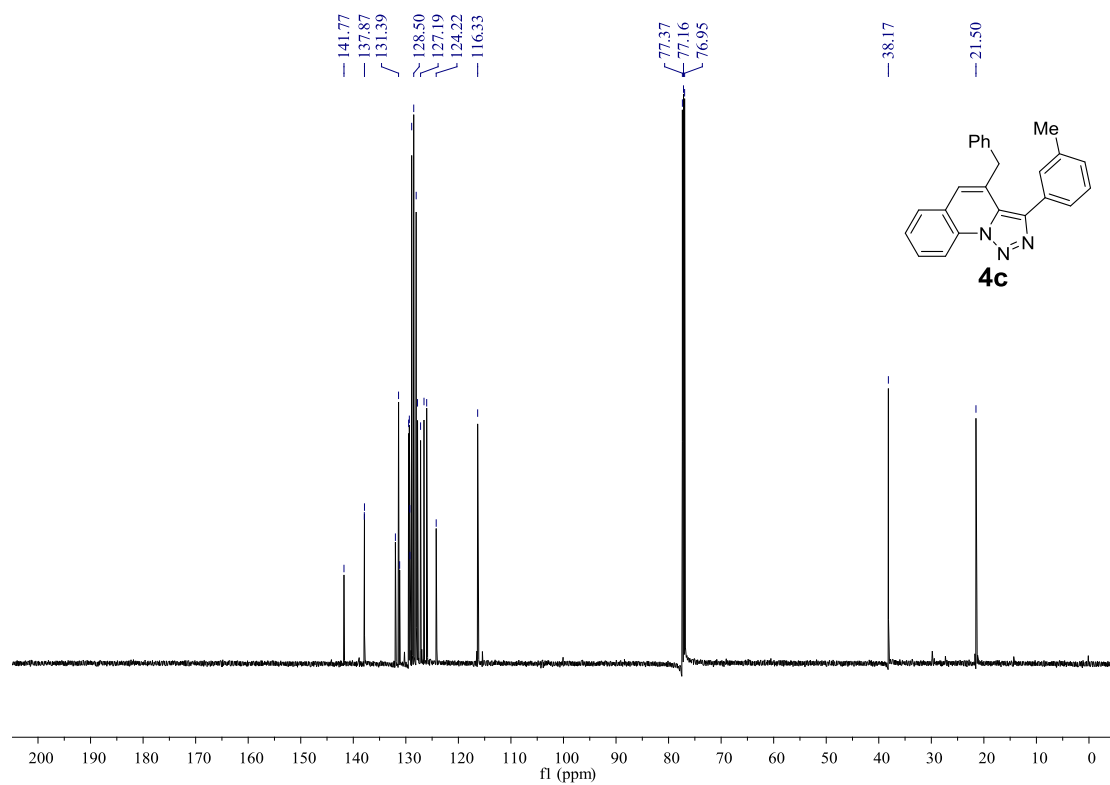

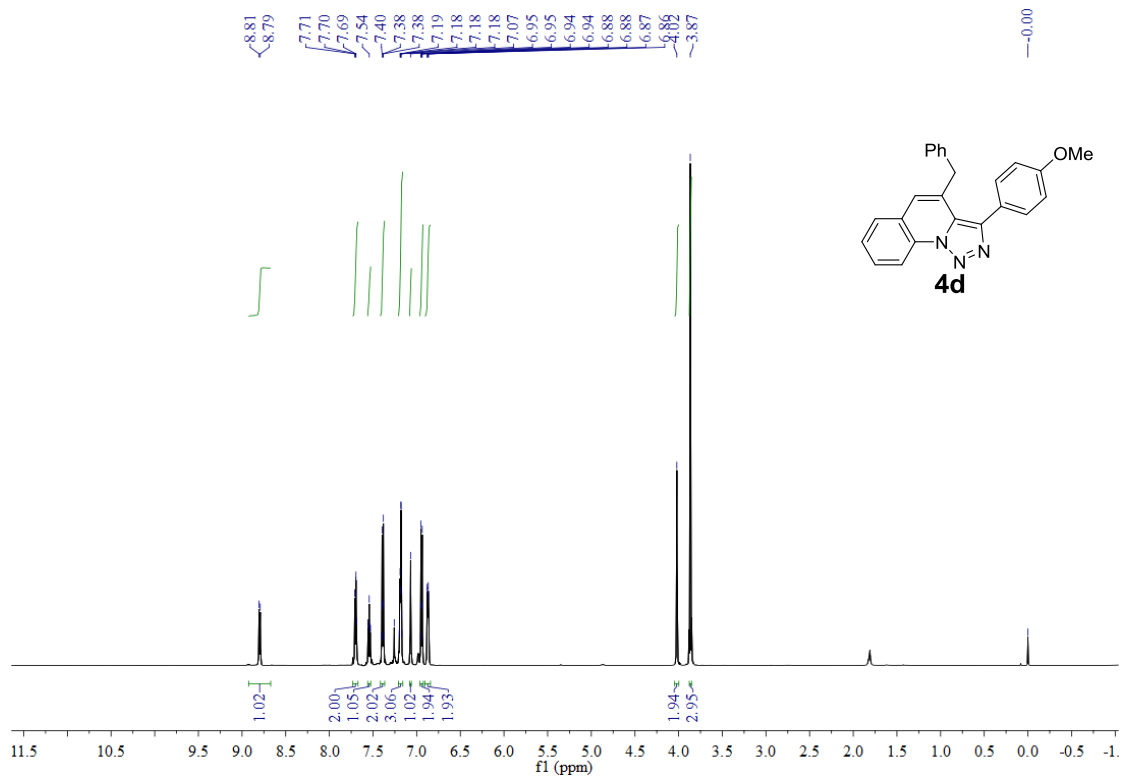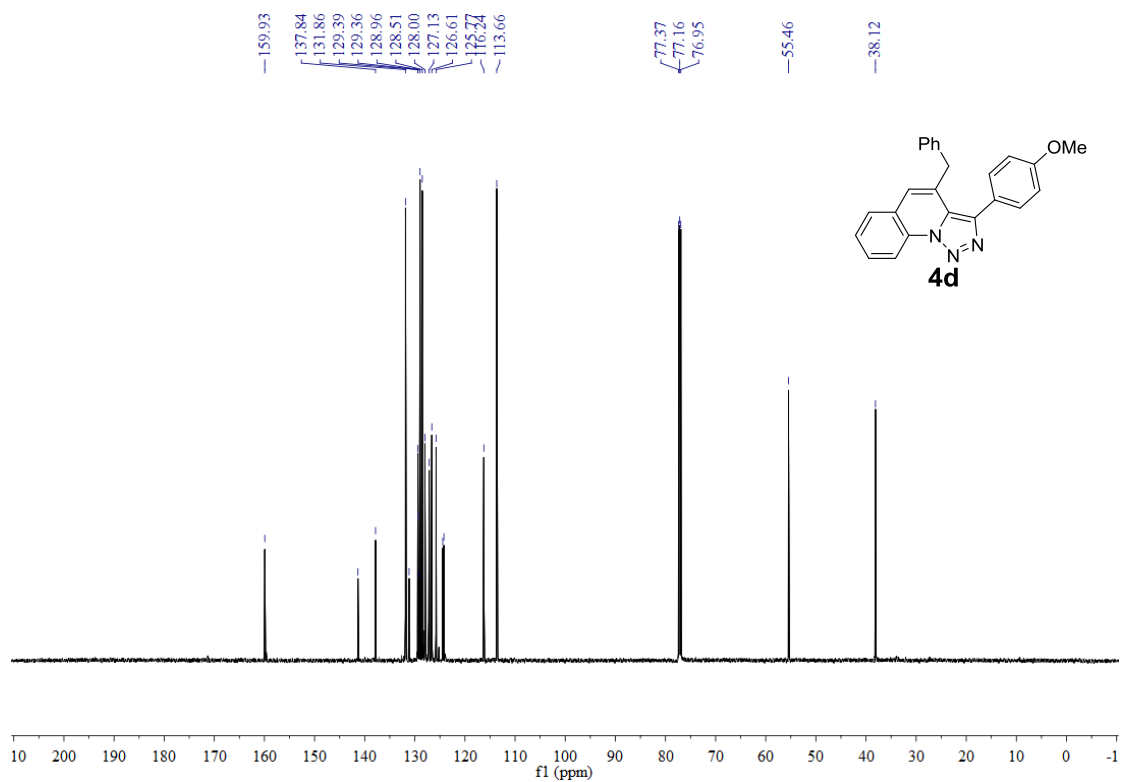

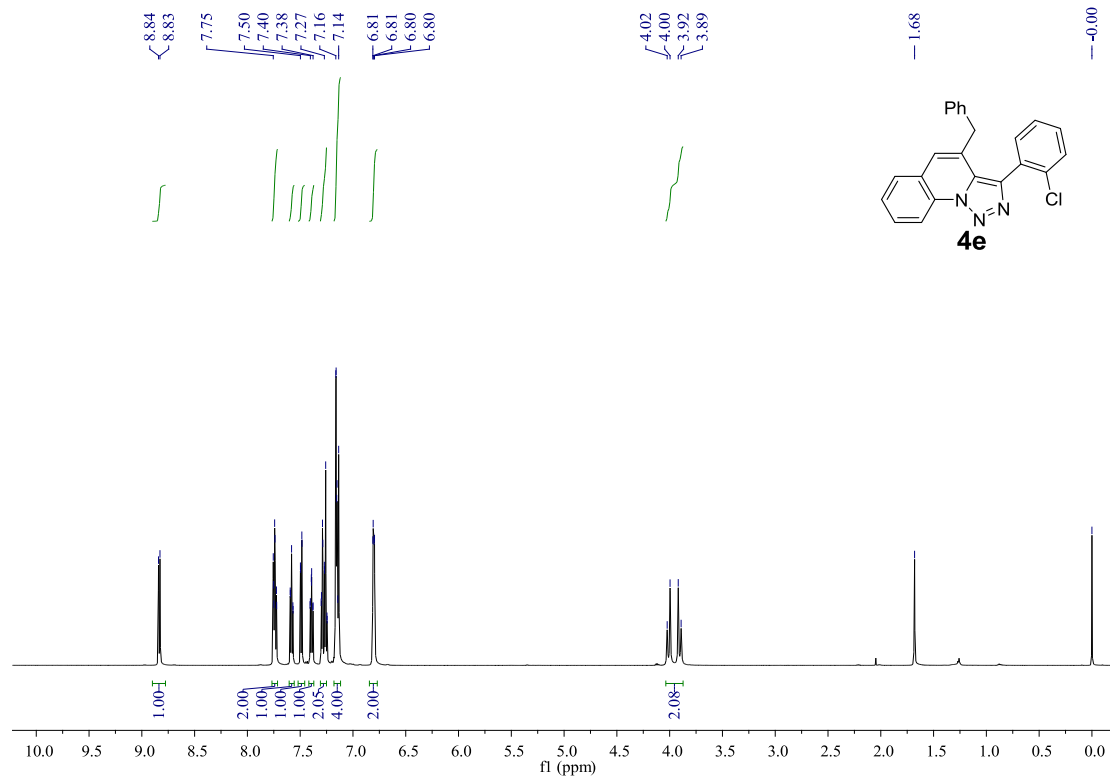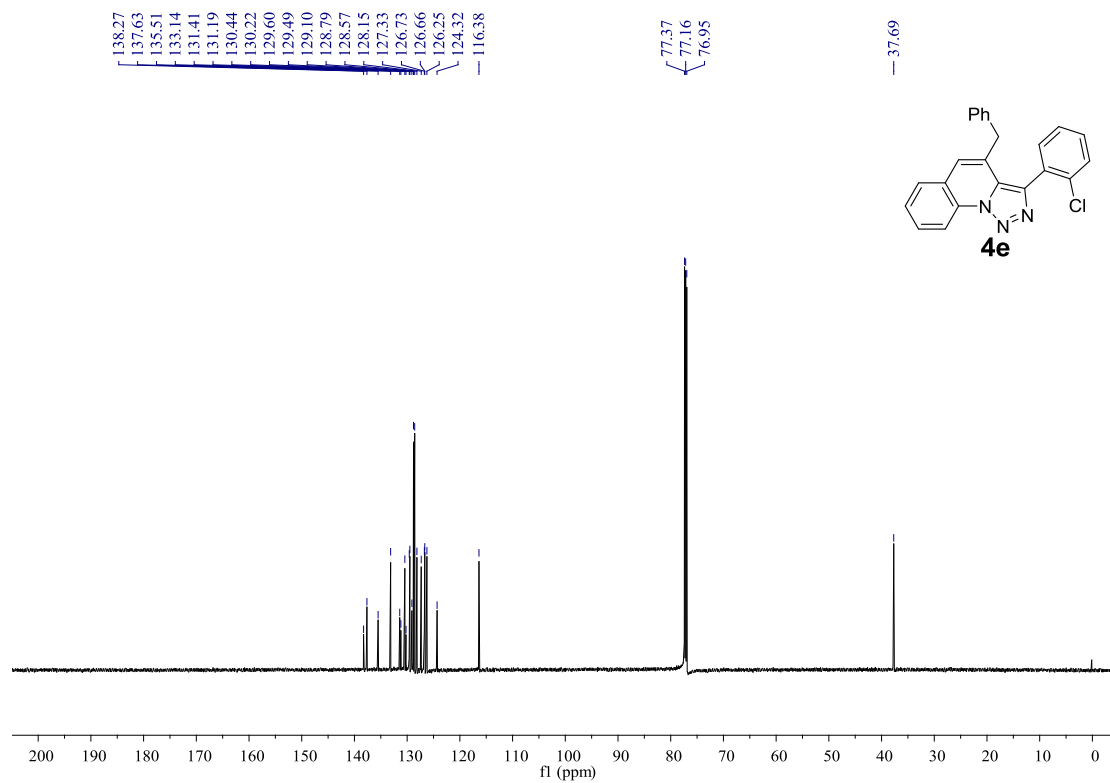

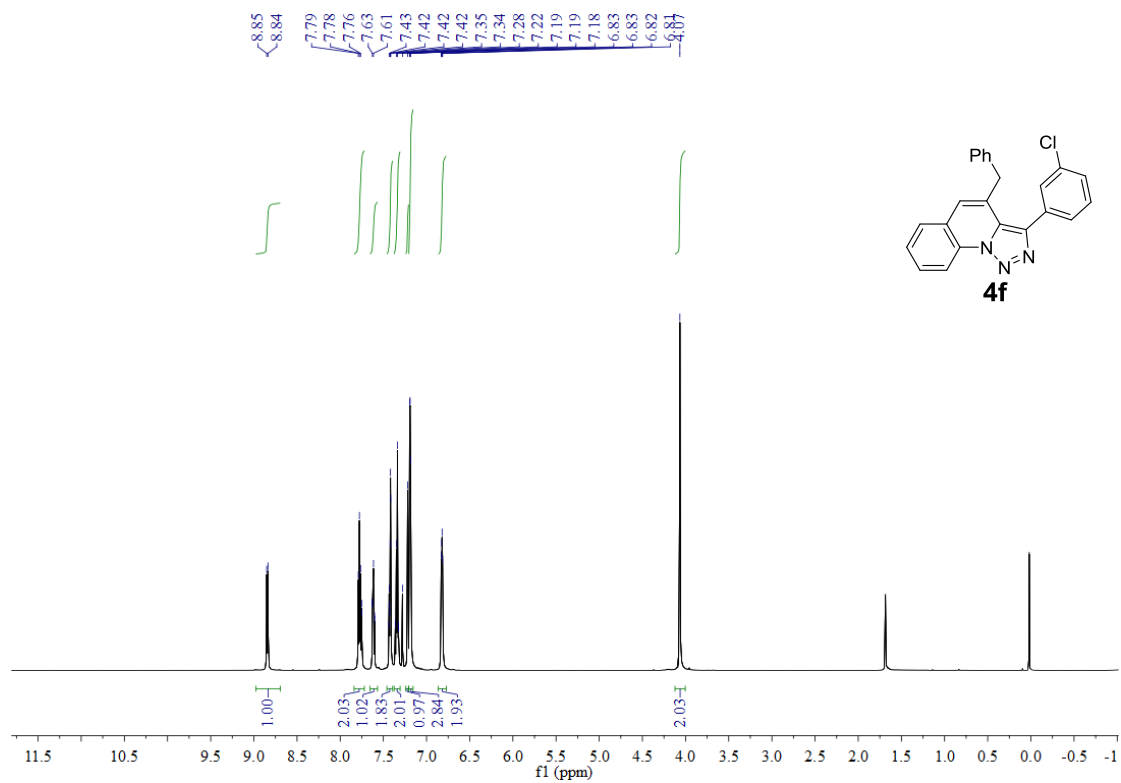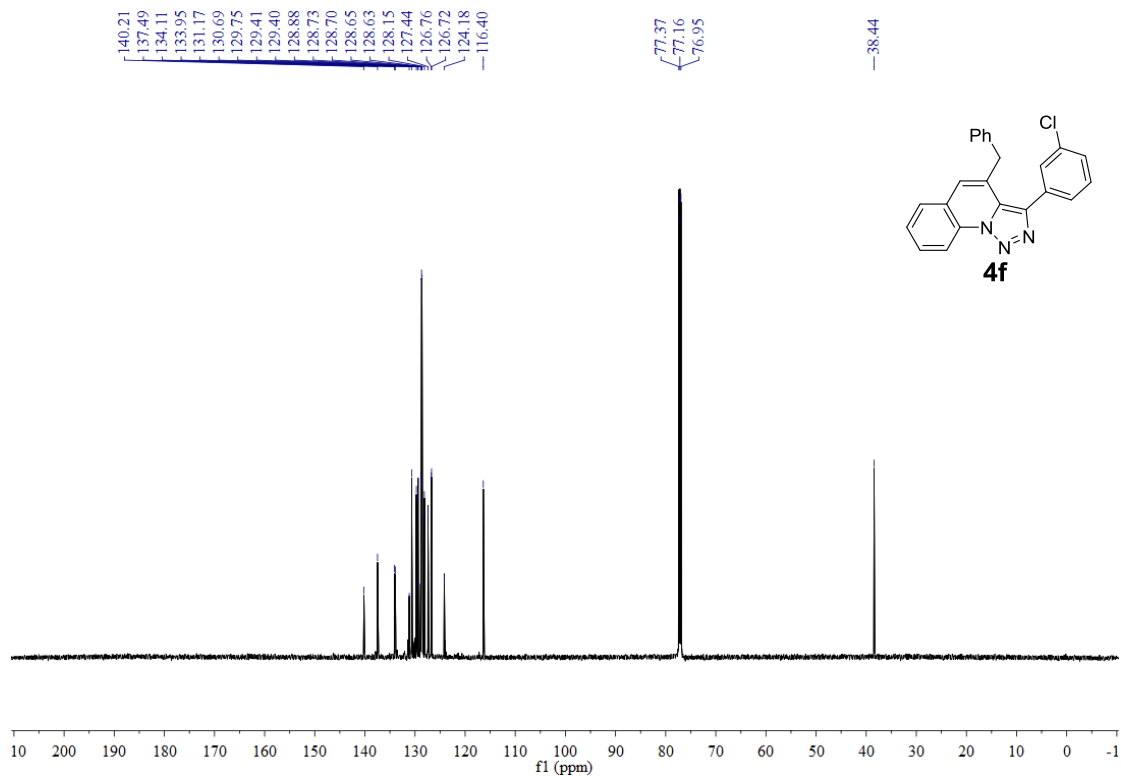

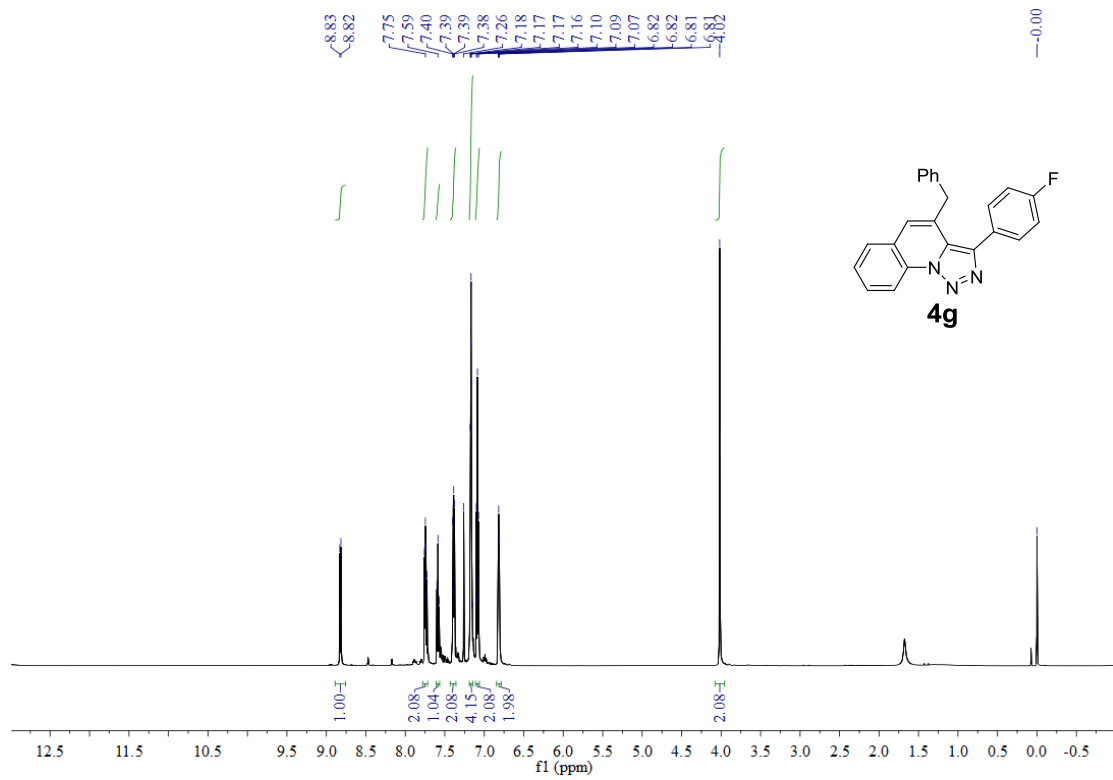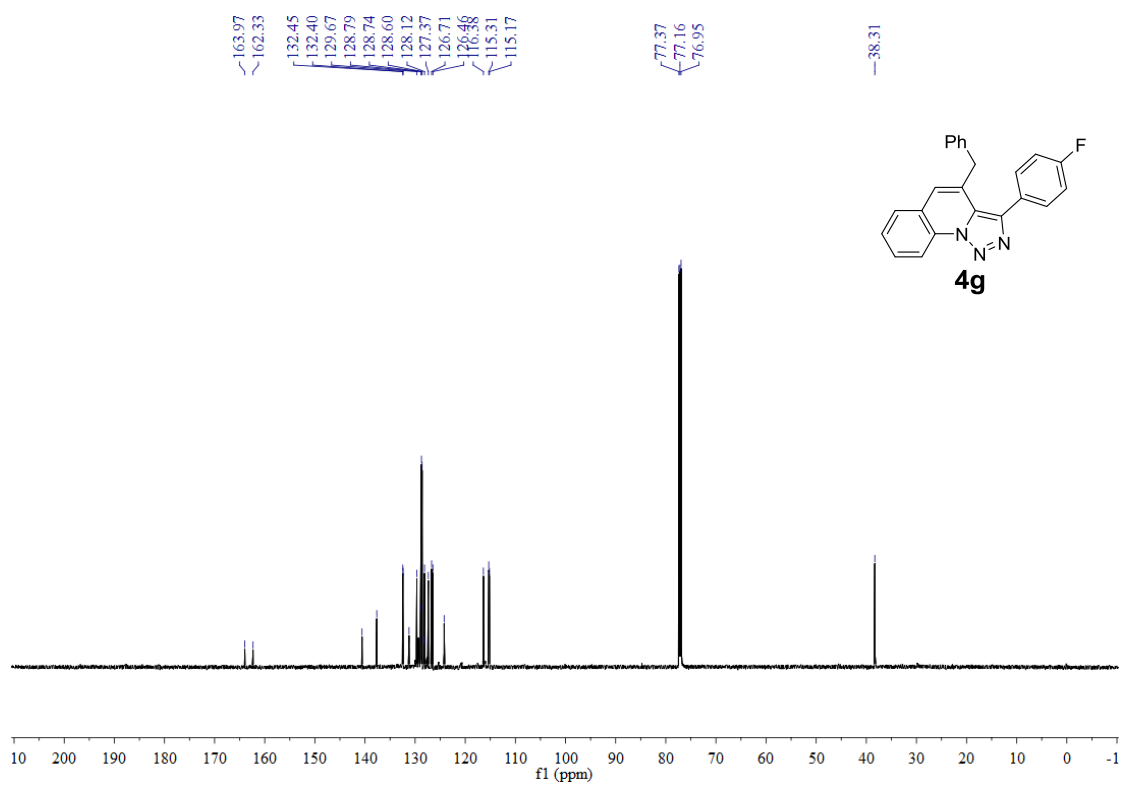

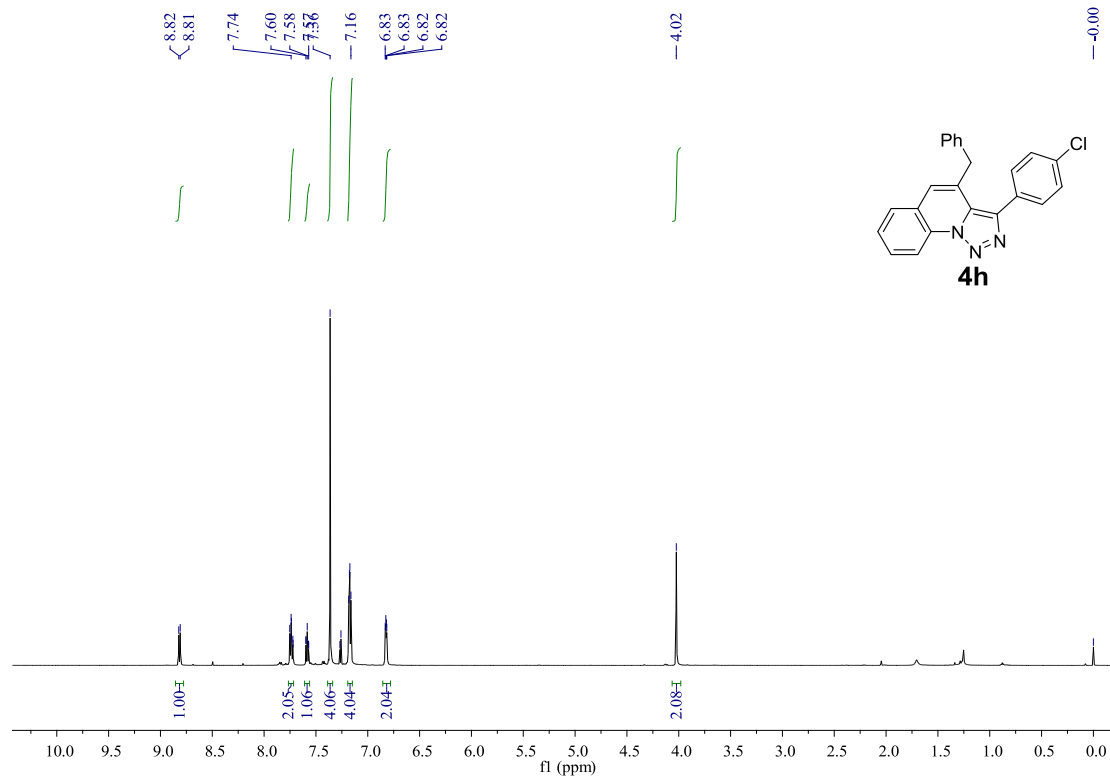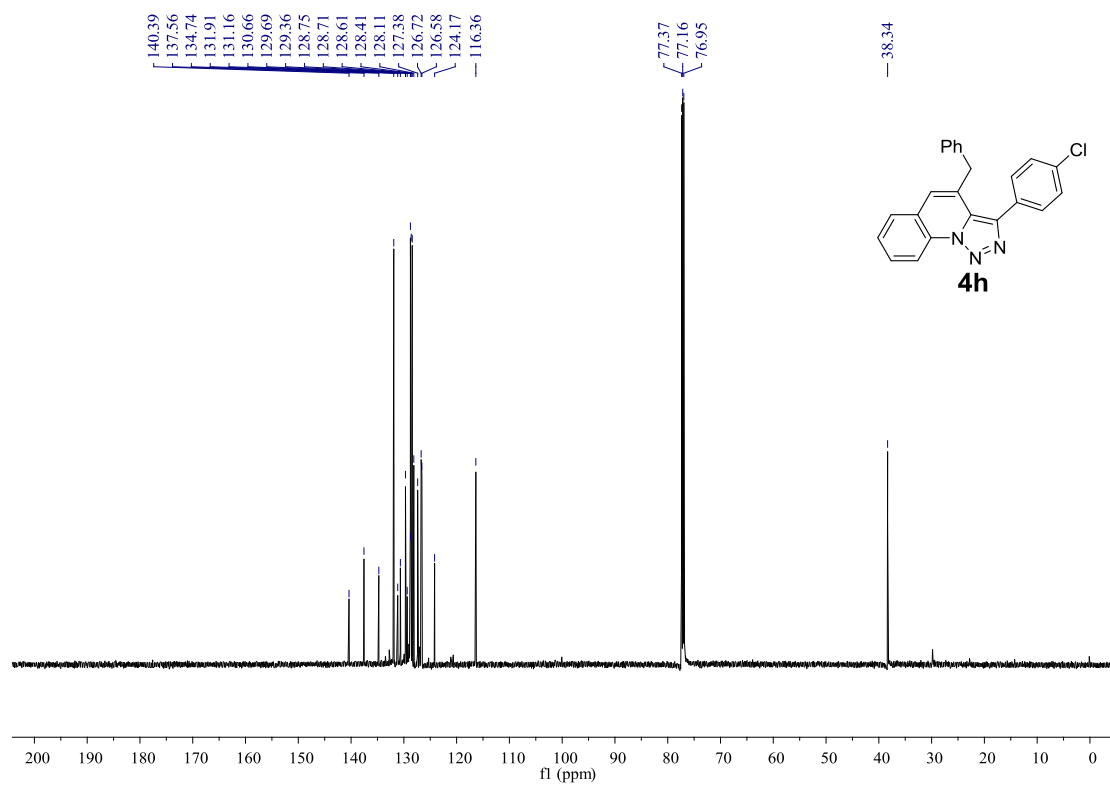



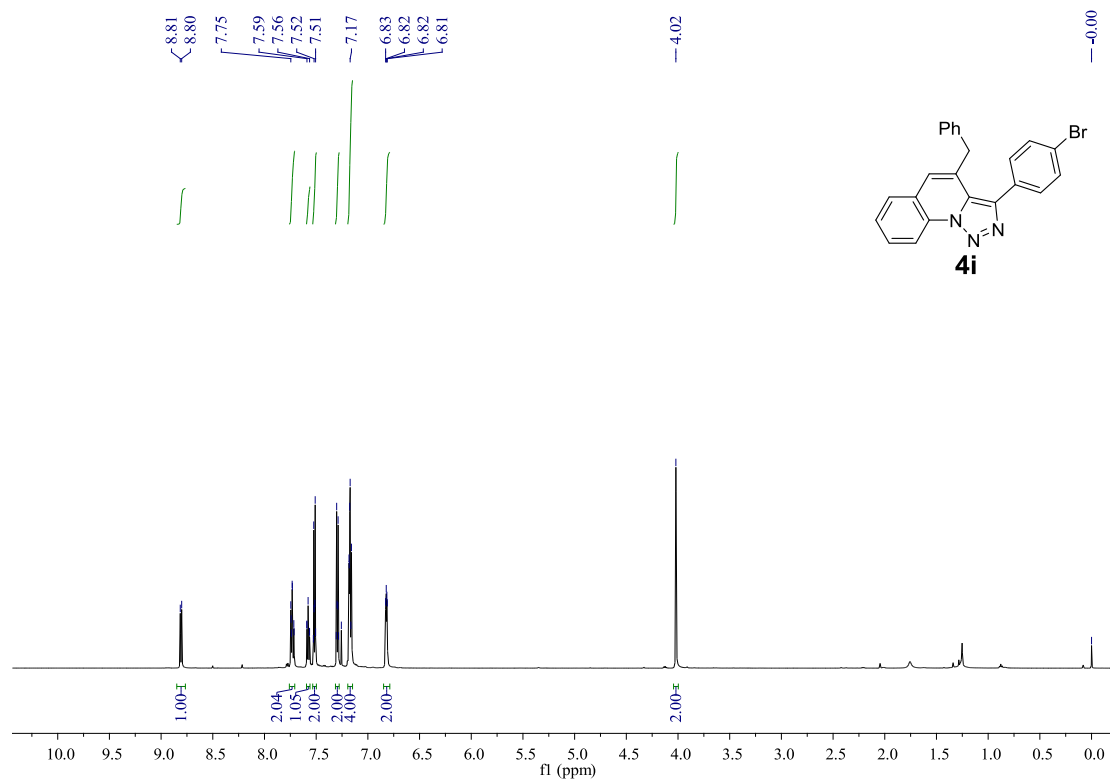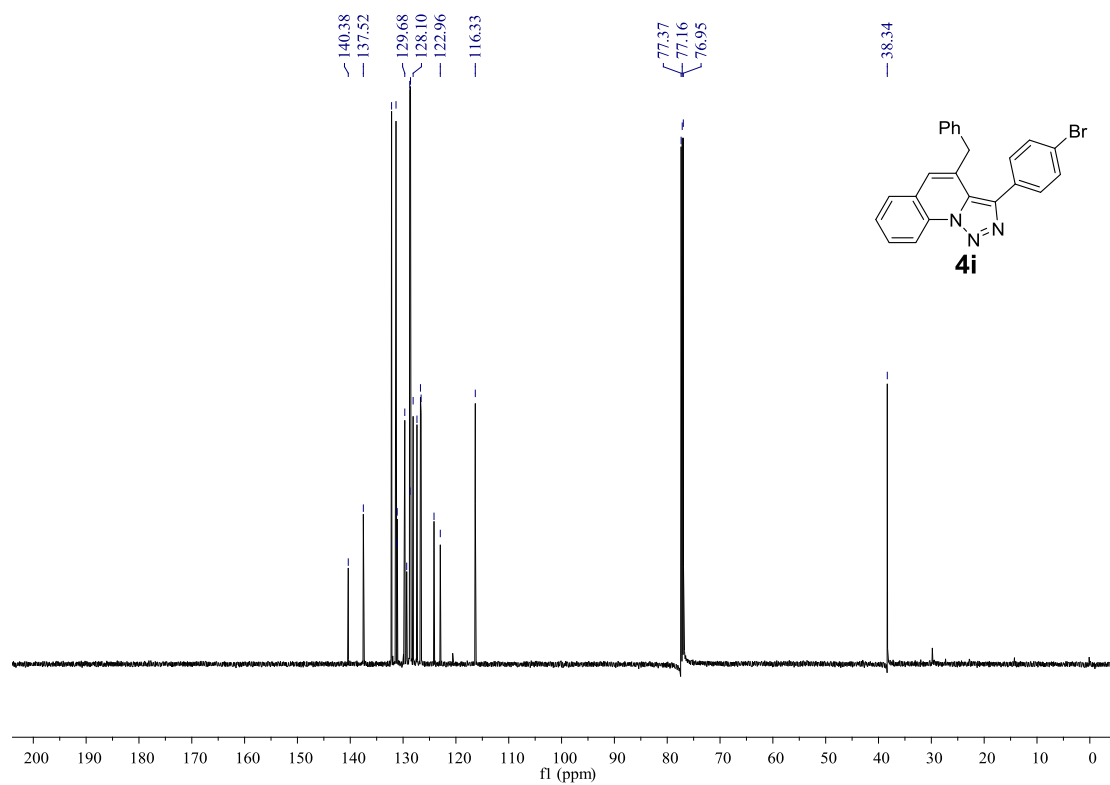

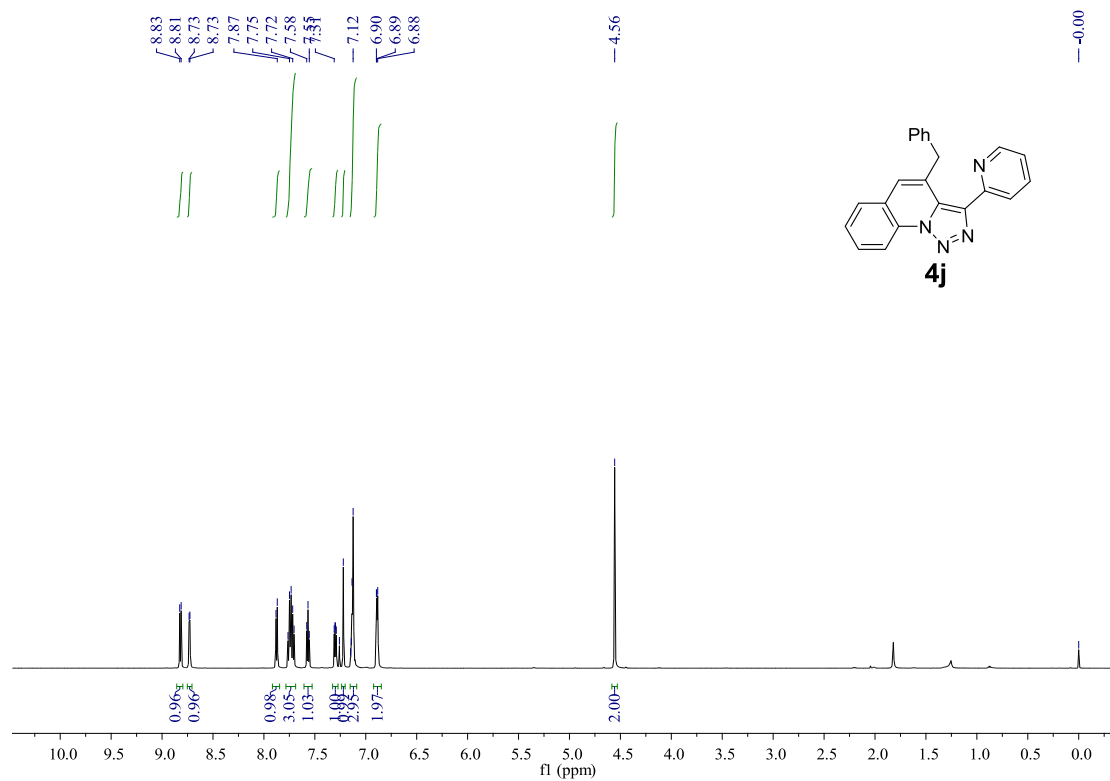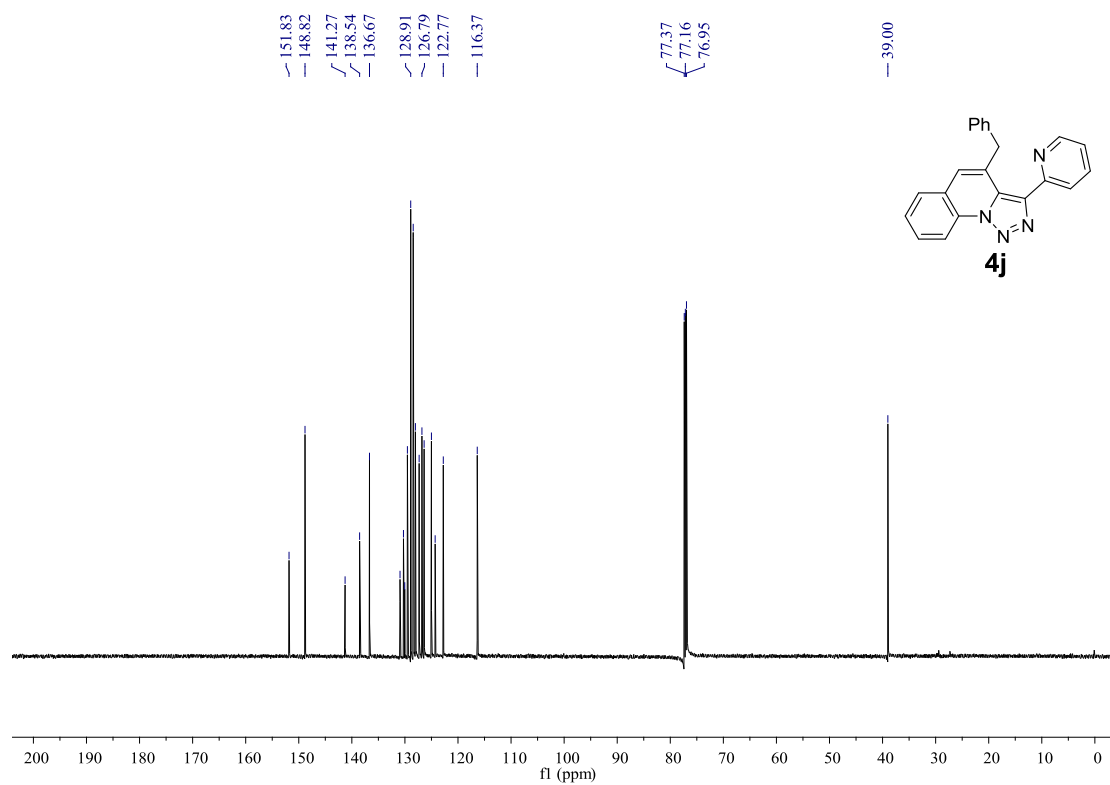

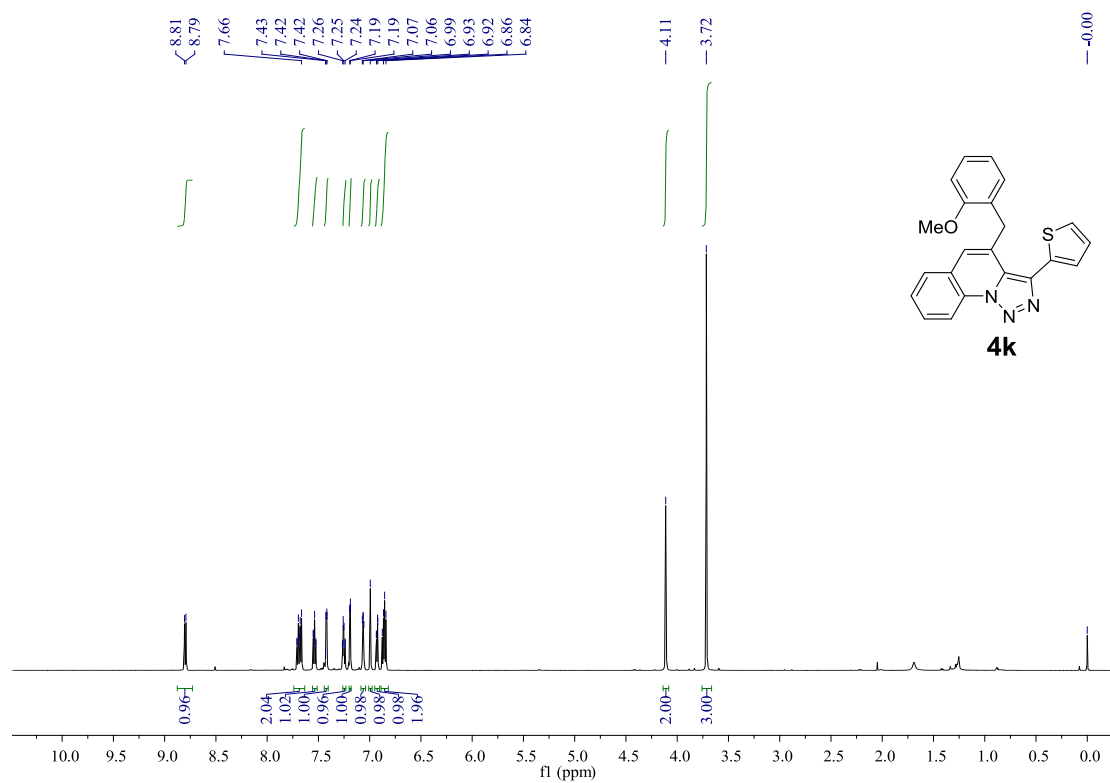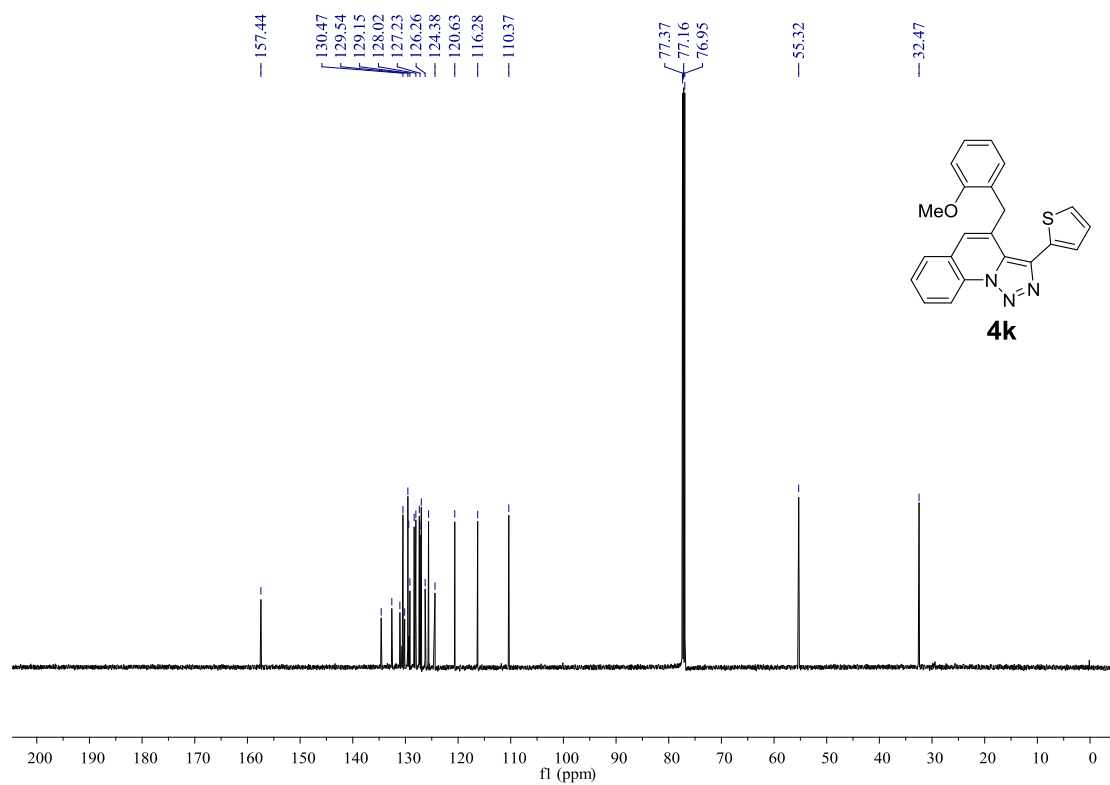

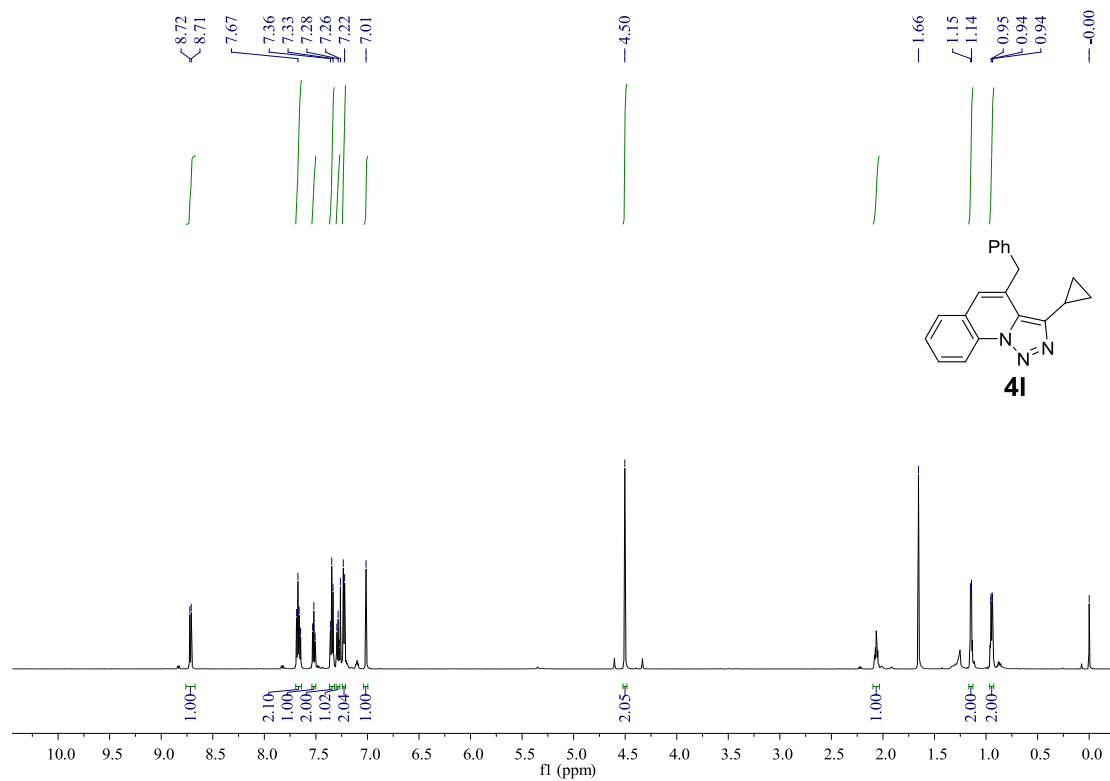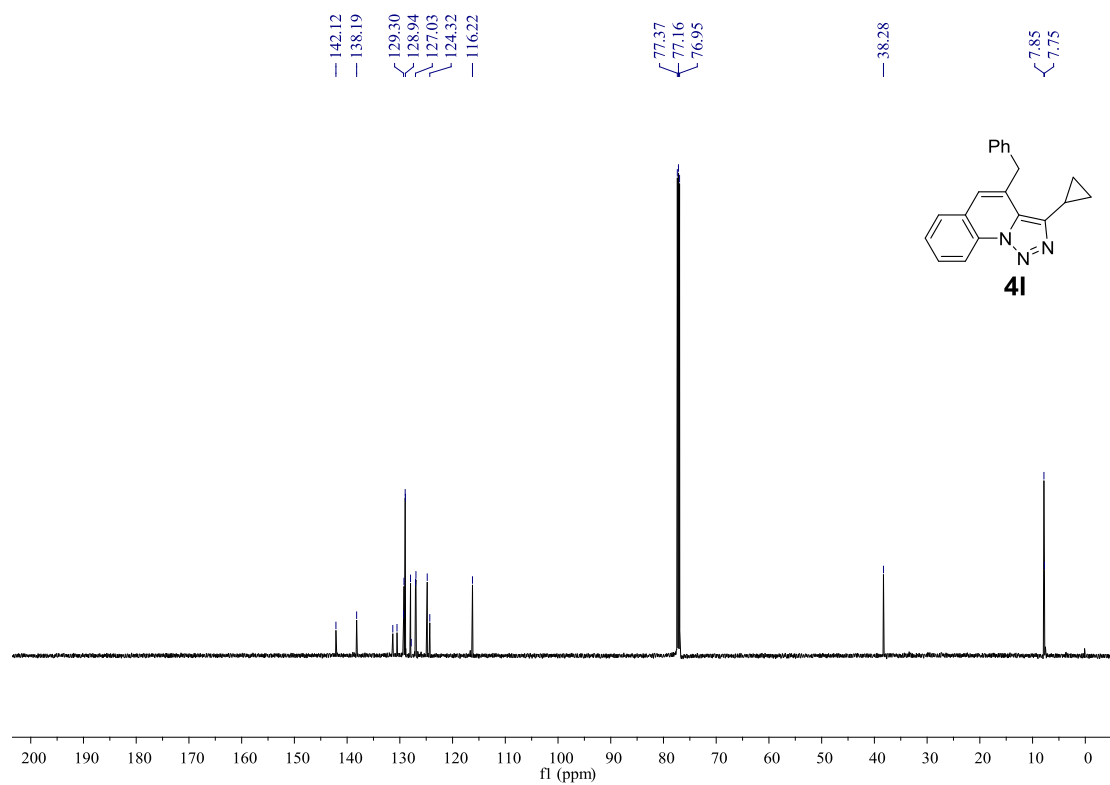

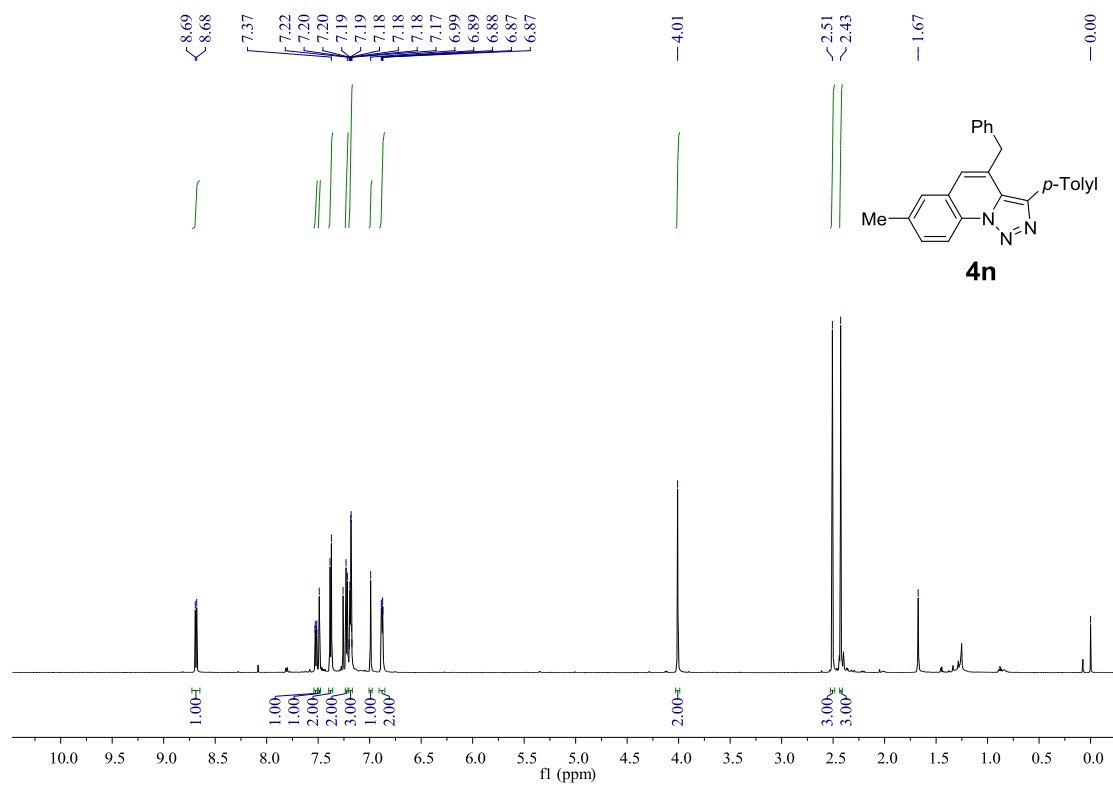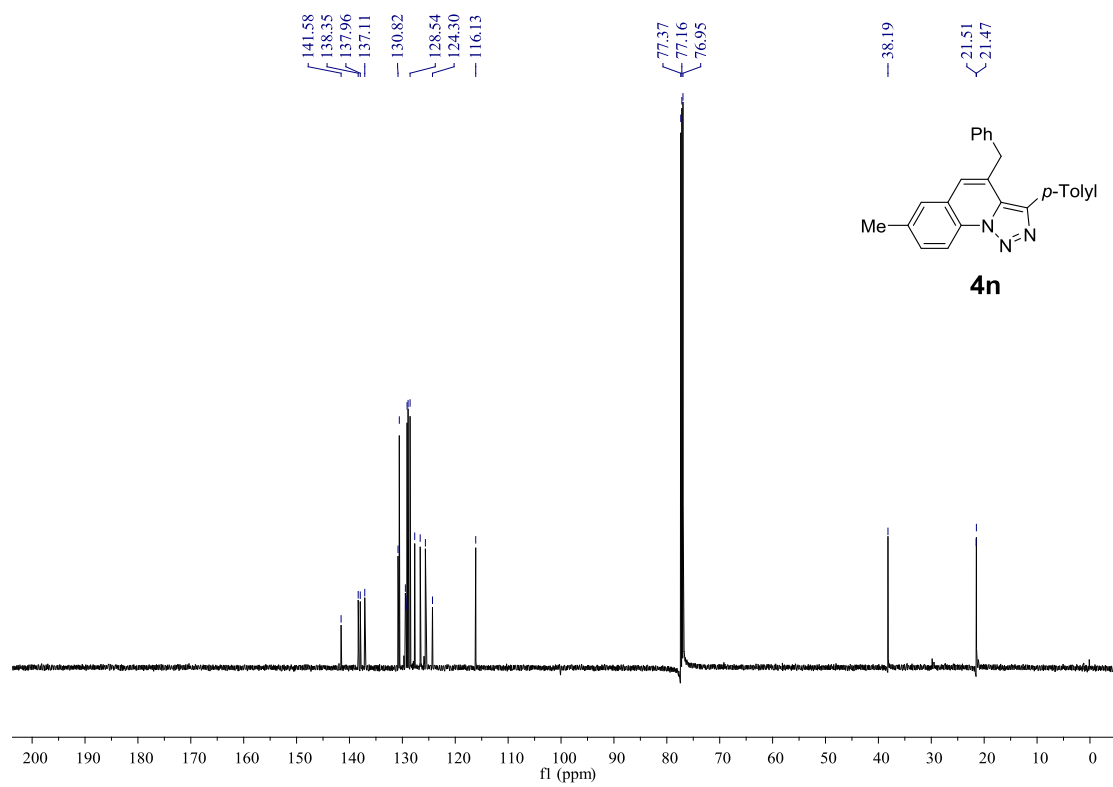

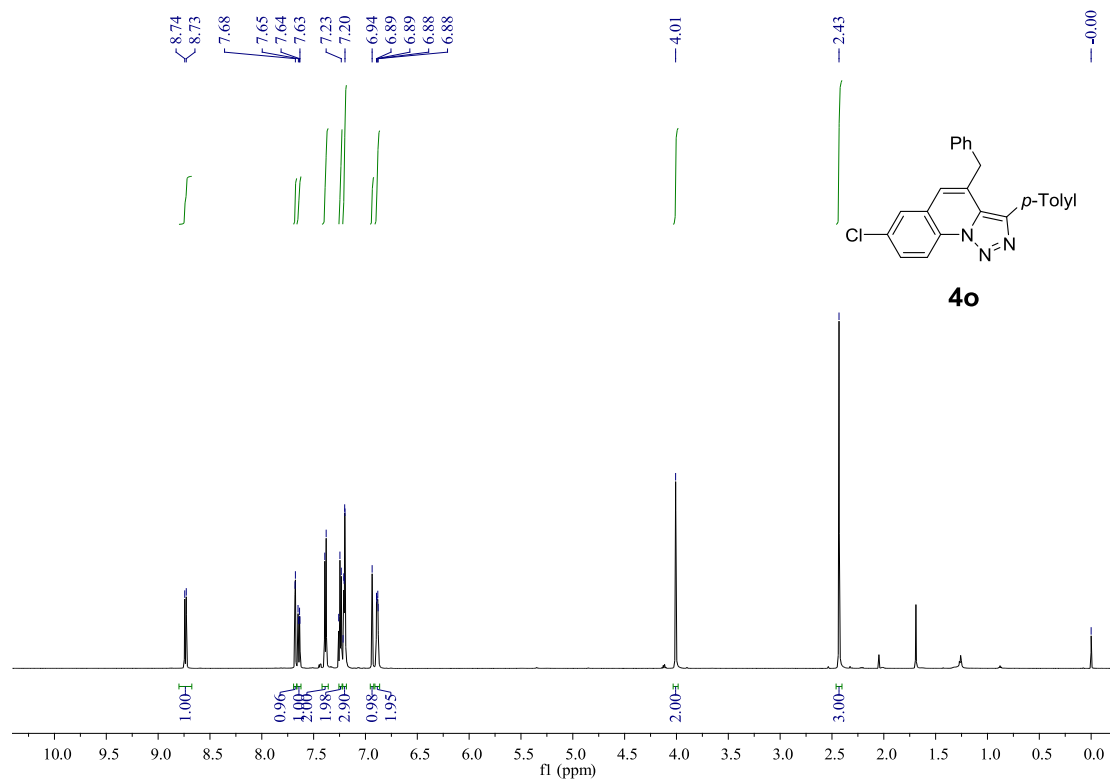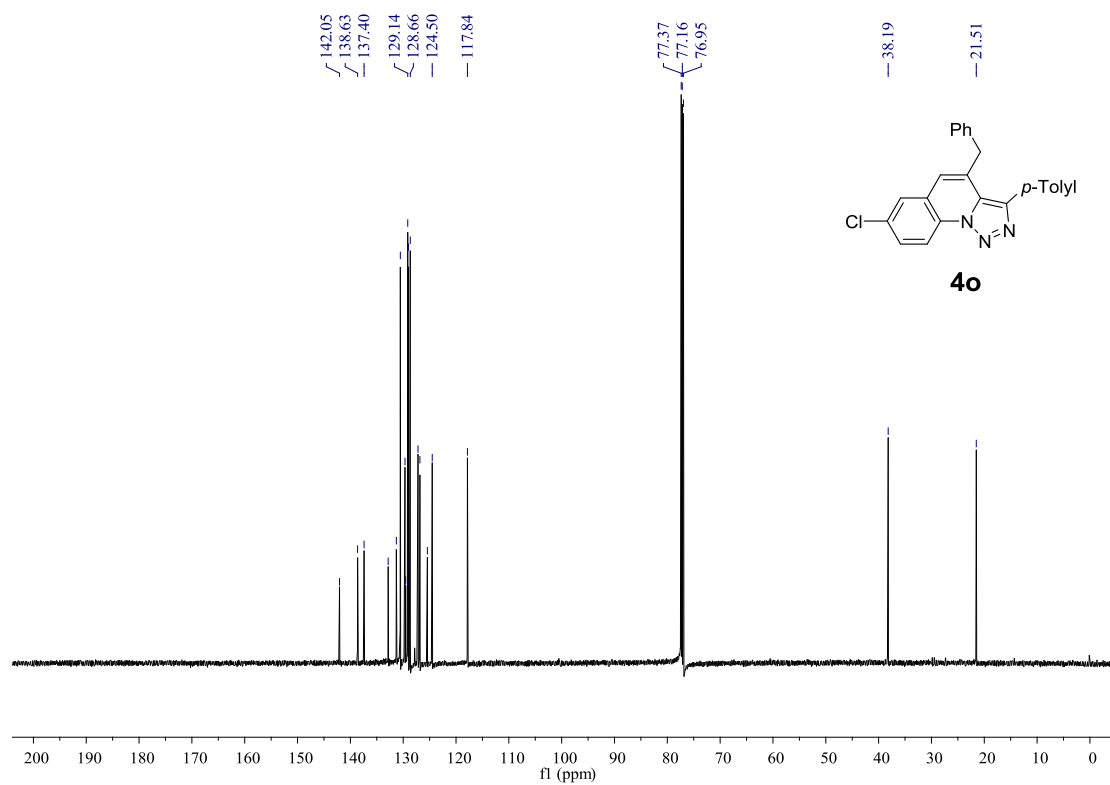

Supplement: d0ob00435a1.pdf [file d0ob00435a1.pdf]
